# Supplementary material for: Magnetic sensitivity of cryptochrome 4 from a migratory songbird
Source: Springer Nature journal article supplement (doi:10.1038/s41586-021-03618-9), 2021-06-23
Supplement: MOESM3 [file 41586_2021_3618_MOESM3_ESM.xlsx]

## Sheet: Fig1a
Absorbance			Conductivity
-0.002454	0		-0.002454	8.80866
0.130699	-0.136273		0.130699	8.71398
0.263851	0.26965		0.263851	8.74324
0.397004	0.23964		0.397004	8.74044
0.530156	0.233544		0.530156	8.73902
0.663308	0.233368		0.663308	8.73773
0.796461	0.265803		0.796461	8.73578
0.929613	0.296274		0.929613	8.73522
1.06276	0.306392		1.06276	8.73387
1.19592	0.382011		1.19592	8.73161
1.32907	0.500596		1.32907	8.73238
1.46222	0.511108		1.46222	8.73325
1.59537	0.293055		1.59537	8.73168
1.72853	0.134018		1.72853	8.73048
1.86168	0.081283		1.86168	8.72908
1.99483	0.070947		1.99483	8.72736
2.12798	0.059238		2.12798	8.7281
2.26114	0.042065		2.26114	8.72769
2.39429	0.022291		2.39429	8.72726
2.52744	0.024179		2.52744	8.72549
2.66059	0.030681		2.66059	8.72577
2.79375	0.040859		2.79375	8.72504
2.9269	0.062658		2.9269	8.72562
3.06005	0.076484		3.06005	8.723
3.1932	0.113213		3.1932	8.7244
3.32636	0.240489		3.32636	8.723
3.45951	0.641704		3.45951	8.74642
3.59266	1.64203		3.59266	8.74114
3.72581	4.01281		3.72581	8.73376
3.85896	8.72993		3.85896	8.72724
3.99212	16.7003		3.99212	8.72252
4.12527	27.7714		4.12527	8.72493
4.25842	39.8089		4.25842	8.76358
4.39157	49.0702		4.39157	8.9286
4.52473	54.014		4.52473	9.32937
4.65788	57.1808		4.65788	9.98494
4.79103	60.9506		4.79103	10.7656
4.92418	68.6948		4.92418	11.5031
5.05734	83.9187		5.05734	12.0617
5.19049	99.9003		5.19049	12.4045
5.32364	109.64		5.32364	12.5712
5.45679	113.002		5.45679	12.6317
5.58995	114.129		5.58995	12.639
5.7231	114.992		5.7231	12.6338
5.85625	115.567		5.85625	12.6217
5.9894	115.619		5.9894	12.6084
6.12256	115.264		6.12256	12.5875
6.25571	114.596		6.25571	12.5584
6.38886	113.656		6.38886	12.5239
6.52201	112.435		6.52201	12.4752
6.65517	110.851		6.65517	12.414
6.78832	108.679		6.78832	12.3416
6.92147	105.655		6.92147	12.2635
7.05462	101.506		7.05462	12.1741
7.18778	96.0503		7.18778	12.0837
7.32093	89.3327		7.32093	11.9853
7.45408	81.5963		7.45408	11.8566
7.58723	73.3218		7.58723	11.646
7.72039	64.8993		7.72039	11.3015
7.85354	56.626		7.85354	10.8346
7.98669	48.5594		7.98669	10.3015
8.11984	40.7415		8.11984	9.78978
8.25299	33.3144		8.25299	9.38152
8.38615	26.6125		8.38615	9.11378
8.5193	20.991		8.5193	8.96128
8.65245	16.6213		8.65245	8.88412
8.7856	13.4006		8.7856	8.83894
8.91876	11.0868		8.91876	8.8093
9.05191	9.42642		9.05191	8.78473
9.18506	8.20551		9.18506	8.7688
9.31821	7.28947		9.31821	8.75317
9.45136	6.56803		9.45136	8.7491
9.58452	6.01631		9.58452	8.74151
9.71767	5.55283		9.71767	8.73585
9.85082	5.1804		9.85082	8.73405
9.98397	4.86977		9.98397	8.73126
10.1171	4.5954		10.1171	8.72688
10.2503	4.41974		10.2503	8.73057
10.3834	4.18079		10.3834	8.73086
10.5166	4.0058		10.5166	8.72858
10.6497	3.83982		10.6497	8.72707
10.7829	3.67307		10.7829	8.72795
10.916	3.53721		10.916	8.72794
11.0492	3.40025		11.0492	8.72807
11.1823	3.30658		11.1823	8.7252
11.3155	3.1765		11.3155	8.7264
11.4487	3.09439		11.4487	8.72709
11.5818	2.97704		11.5818	8.72261
11.715	2.8907		11.715	8.72412
11.8481	2.8191		11.8481	8.72324
11.9813	2.72054		11.9813	8.725
12.1144	2.65942		12.1144	8.7242
12.2476	2.59408		12.2476	8.72413
12.3807	2.53372		12.3807	8.72247
12.5139	2.48027		12.5139	8.72021
12.647	2.41603		12.647	8.72681
12.7802	2.42837		12.7802	8.78939
12.9133	2.36015		12.9133	8.77126
13.0465	2.29549		13.0465	8.75352
13.1796	2.24559		13.1796	8.74094
13.3128	2.21163		13.3128	8.73387
13.4459	2.17605		13.4459	8.72838
13.5791	2.14326		13.5791	8.72768
13.7122	2.10428		13.7122	8.72523
13.8454	2.07922		13.8454	8.72465
13.9785	2.0501		13.9785	8.72352
14.1117	2.03687		14.1117	8.72185
14.2449	2.00919		14.2449	8.72315
14.378	1.97972		14.378	8.72074
14.5112	1.95446		14.5112	8.71986
14.6443	1.9288		14.6443	8.71864
14.7775	1.89948		14.7775	8.7185
14.9106	1.88077		14.9106	8.71811
15.0438	1.86482		15.0438	8.71729
15.1769	1.83079		15.1769	8.71542
15.3101	1.8046		15.3101	8.71415
15.4432	1.79463		15.4432	8.71565
15.5764	1.76789		15.5764	8.71523
15.7095	1.73701		15.7095	8.7152
15.8427	1.74318		15.8427	8.7149
15.9758	1.71313		15.9758	8.71253
16.109	1.68864		16.109	8.71445
16.2421	1.66982		16.2421	8.71291
16.3753	1.64999		16.3753	8.71337
16.5084	1.64564		16.5084	8.71274
16.6416	1.63081		16.6416	8.71358
16.7747	1.61316		16.7747	8.7126
16.9079	1.59721		16.9079	8.71308
17.0411	1.57668		17.0411	8.71207
17.1742	1.55305		17.1742	8.71106
17.3074	1.56269		17.3074	8.71149
17.4405	1.54922		17.4405	8.71052
17.5737	1.53788		17.5737	8.71123
17.7068	1.52829		17.7068	8.70935
17.84	1.51357		17.84	8.70849
17.9731	1.50627		17.9731	8.71125
18.1063	1.48369		18.1063	8.71036
18.2394	1.49628		18.2394	8.70727
18.3726	1.49101		18.3726	8.70781
18.5057	1.48299		18.5057	8.70792
18.6389	1.47231		18.6389	8.7097
18.772	1.47206		18.772	8.70927
18.9052	1.46062		18.9052	8.70949
19.0383	1.45168		19.0383	8.70704
19.1715	1.44103		19.1715	8.70877
19.3046	1.44595		19.3046	8.70854
19.4378	1.45286		19.4378	8.70705
19.5709	1.43768		19.5709	8.70699
19.7041	1.44769		19.7041	8.70929
19.8373	1.44438		19.8373	8.70718
19.9704	1.43973		19.9704	8.70785
20.1036	1.42284		20.1036	8.7071
20.2367	1.41273		20.2367	8.70828
20.3699	1.42769		20.3699	8.70789
20.503	1.41938		20.503	8.70834
20.6362	1.42169		20.6362	8.70612
20.7693	1.42602		20.7693	8.70716
20.9025	1.42285		20.9025	8.7069
21.0356	1.42515		21.0356	8.70572
21.1688	1.41779		21.1688	8.70599
21.3019	1.41802		21.3019	8.70641
21.4351	1.42922		21.4351	8.70586
21.5682	1.41604		21.5682	8.70559
21.7014	1.44166		21.7014	8.70462
21.8345	1.43521		21.8345	8.70488
21.9677	1.43598		21.9677	8.7047
22.1008	1.44165		22.1008	8.70512
22.234	1.44951		22.234	8.70561
22.3671	1.4387		22.3671	8.70434
22.5003	1.43657		22.5003	8.70501
22.6335	1.44558		22.6335	8.70529
22.7666	1.44824		22.7666	8.70327
22.8998	1.44852		22.8998	8.70404
23.0329	1.45141		23.0329	8.70499
23.1661	1.45735		23.1661	8.70256
23.2992	1.45717		23.2992	8.70332
23.4324	1.46242		23.4324	8.70268
23.5655	1.45701		23.5655	8.70353
23.6987	1.46064		23.6987	8.70294
23.8318	1.47265		23.8318	8.70303
23.965	1.47116		23.965	8.70144
24.0981	1.48128		24.0981	8.70352
24.2313	1.47192		24.2313	8.70429
24.3644	1.46976		24.3644	8.70213
24.4976	1.47365		24.4976	8.70249
24.6307	1.47763		24.6307	8.70225
24.7639	1.46843		24.7639	8.70192
24.897	1.469		24.897	8.70279
25.0302	1.47615		25.0302	8.70125
25.1633	1.4702		25.1633	8.70154
25.2965	1.4672		25.2965	8.70064
25.4297	1.47491		25.4297	8.70059
25.5628	1.48024		25.5628	8.70113
25.696	1.47762		25.696	8.70074
25.8291	1.46947		25.8291	8.70046
25.9623	1.47304		25.9623	8.70298
26.0954	1.47385		26.0954	8.69921
26.2286	1.47232		26.2286	8.70269
26.3617	1.46428		26.3617	8.70152
26.4949	1.46097		26.4949	8.70003
26.628	1.45227		26.628	8.70111
26.7612	1.46264		26.7612	8.70055
26.8943	1.46389		26.8943	8.70216
27.0275	1.47147		27.0275	8.70178
27.1606	1.46914		27.1606	8.70329
27.2938	1.45749		27.2938	8.70038
27.4269	1.4443		27.4269	8.70251
27.5601	1.43838		27.5601	8.69892
27.6932	1.43183		27.6932	8.70133
27.8264	1.42866		27.8264	8.69899
27.9595	1.42063		27.9595	8.70089
28.0927	1.43006		28.0927	8.7008
28.2259	1.4267		28.2259	8.70076
28.359	1.41336		28.359	8.69912
28.4922	1.4169		28.4922	8.70045
28.6253	1.40386		28.6253	8.6999
28.7585	1.41211		28.7585	8.69994
28.8916	1.40754		28.8916	8.70058
29.0248	1.38936		29.0248	8.70023
29.1579	1.39305		29.1579	8.70164
29.2911	1.38252		29.2911	8.69764
29.4242	1.37282		29.4242	8.6987
29.5574	1.38705		29.5574	8.69882
29.6905	1.37396		29.6905	8.69841
29.8237	1.36548		29.8237	8.69904
29.9568	1.37795		29.9568	8.69881
30.09	1.36208		30.09	8.69961
30.2231	1.3571		30.2231	8.69733
30.3563	1.3443		30.3563	8.69724
30.4894	1.3458		30.4894	8.69946
30.6226	1.3455		30.6226	8.69708
30.7557	1.33758		30.7557	8.69734
30.8889	1.33055		30.8889	8.69842
31.0221	1.34287		31.0221	8.70149
31.1552	1.3401		31.1552	8.70399
31.2884	1.33998		31.2884	8.71236
31.4215	1.32543		31.4215	8.72045
31.5547	1.32391		31.5547	8.73366
31.6878	1.33118		31.6878	8.74997
31.821	1.34264		31.821	8.77324
31.9541	1.35711		31.9541	8.80265
32.0873	1.37471		32.0873	8.83738
32.2204	1.40605		32.2204	8.88161
32.3536	1.43854		32.3536	8.937
32.4867	1.47788		32.4867	8.99814
32.6199	1.52215		32.6199	9.06707
32.753	1.56648		32.753	9.14091
32.8862	1.62371		32.8862	9.21332
33.0193	1.67277		33.0193	9.29195
33.1525	1.7313		33.1525	9.36938
33.2856	1.79265		33.2856	9.44651
33.4188	1.84123		33.4188	9.52643
33.5519	1.89829		33.5519	9.6019
33.6851	1.9463		33.6851	9.67478
33.8183	1.9949		33.8183	9.75383
33.9514	2.05016		33.9514	9.82733
34.0846	2.10785		34.0846	9.90367
34.2177	2.15949		34.2177	9.97608
34.3509	2.19969		34.3509	10.0502
34.484	2.25292		34.484	10.1241
34.6172	2.29579		34.6172	10.1974
34.7503	2.32705		34.7503	10.2717
34.8835	2.37688		34.8835	10.3437
35.0166	2.42096		35.0166	10.418
35.1498	2.45213		35.1498	10.4909
35.2829	2.46935		35.2829	10.5673
35.4161	2.48631		35.4161	10.638
35.5492	2.51217		35.5492	10.7116
35.6824	2.5101		35.6824	10.7829
35.8155	2.50977		35.8155	10.8559
35.9487	2.50041		35.9487	10.93
36.0818	2.51045		36.0818	11.0016
36.215	2.48811		36.215	11.0761
36.3481	2.46713		36.3481	11.1532
36.4813	2.43816		36.4813	11.2269
36.6145	2.41785		36.6145	11.3027
36.7476	2.39525		36.7476	11.3765
36.8808	2.3608		36.8808	11.4502
37.0139	2.34121		37.0139	11.523
37.1471	2.31088		37.1471	11.5957
37.2802	2.2944		37.2802	11.6731
37.4134	2.27023		37.4134	11.7441
37.5465	2.25669		37.5465	11.8153
37.6797	2.24356		37.6797	11.89
37.8128	2.2356		37.8128	11.9649
37.946	2.23713		37.946	12.0375
38.0791	2.25066		38.0791	12.1081
38.2123	2.26297		38.2123	12.1834
38.3454	2.27302		38.3454	12.2577
38.4786	2.30022		38.4786	12.3313
38.6117	2.3289		38.6117	12.4037
38.7449	2.36545		38.7449	12.4811
38.878	2.39056		38.878	12.5533
39.0112	2.42391		39.0112	12.6241
39.1443	2.47361		39.1443	12.6976
39.2775	2.53023		39.2775	12.7714
39.4107	2.57343		39.4107	12.8424
39.5438	2.61989		39.5438	12.916
39.677	2.68371		39.677	12.9856
39.8101	2.72382		39.8101	13.0559
39.9433	2.78076		39.9433	13.1292
40.0764	2.84135		40.0764	13.2002
40.2096	2.89199		40.2096	13.2744
40.3427	2.94947		40.3427	13.3446
40.4759	3.01417		40.4759	13.4174
40.609	3.07504		40.609	13.4888
40.7422	3.13208		40.7422	13.5628
40.8753	3.20914		40.8753	13.6293
41.0085	3.27582		41.0085	13.7029
41.1416	3.34597		41.1416	13.7762
41.2748	3.40553		41.2748	13.8444
41.4079	3.49098		41.4079	13.9181
41.5411	3.5659		41.5411	13.991
41.6742	3.6334		41.6742	14.0587
41.8074	3.71412		41.8074	14.1275
41.9405	3.78035		41.9405	14.1978
42.0737	3.85088		42.0737	14.2704
42.2069	3.92856		42.2069	14.3389
42.34	4.00167		42.34	14.4095
42.4732	4.07123		42.4732	14.4787
42.6063	4.15333		42.6063	14.552
42.7395	4.23887		42.7395	14.6213
42.8726	4.30678		42.8726	14.6918
43.0058	4.38946		43.0058	14.761
43.1389	4.47706		43.1389	14.8303
43.2721	4.55412		43.2721	14.899
43.4052	4.63798		43.4052	14.9703
43.5384	4.70989		43.5384	15.0428
43.6715	4.79272		43.6715	15.1089
43.8047	4.8776		43.8047	15.1831
43.9378	4.9684		43.9378	15.251
44.071	5.04962		44.071	15.3233
44.2041	5.14261		44.2041	15.3871
44.3373	5.22292		44.3373	15.4623
44.4704	5.3086		44.4704	15.5363
44.6036	5.40347		44.6036	15.6042
44.7367	5.48764		44.7367	15.6762
44.8699	5.58053		44.8699	15.747
45.0031	5.67357		45.0031	15.8151
45.1362	5.75218		45.1362	15.8855
45.2694	5.8566		45.2694	15.96
45.4025	5.95469		45.4025	16.0286
45.5357	6.05183		45.5357	16.1006
45.6688	6.15281		45.6688	16.1677
45.802	6.26367		45.802	16.2401
45.9351	6.37831		45.9351	16.3106
46.0683	6.50635		46.0683	16.3816
46.2014	6.6462		46.2014	16.4484
46.3346	6.81524		46.3346	16.5231
46.4677	6.98634		46.4677	16.5926
46.6009	7.18427		46.6009	16.6641
46.734	7.40127		46.734	16.7336
46.8672	7.642		46.8672	16.8008
47.0003	7.89652		47.0003	16.8737
47.1335	8.16585		47.1335	16.9372
47.2666	8.44326		47.2666	17.0092
47.3998	8.73295		47.3998	17.0821
47.5329	9.02846		47.5329	17.1492
47.6661	9.32333		47.6661	17.2187
47.7993	9.62118		47.7993	17.2919
47.9324	9.91098		47.9324	17.3644
48.0656	10.2038		48.0656	17.4313
48.1987	10.5127		48.1987	17.4982
48.3319	10.8319		48.3319	17.5727
48.465	11.1908		48.465	17.641
48.5982	11.587		48.5982	17.7095
48.7313	12.0529		48.7313	17.7776
48.8645	12.609		48.8645	17.8499
48.9976	13.2875		48.9976	17.9182
49.1308	14.1068		49.1308	17.9869
49.2639	15.1089		49.2639	18.0595
49.3971	16.3132		49.3971	18.1264
49.5302	17.8168		49.5302	18.1994
49.6634	19.6201		49.6634	18.2697
49.7965	21.8186		49.7965	18.3372
49.9297	24.4841		49.9297	18.4064
50.0628	27.6982		50.0628	18.4748
50.196	31.5908		50.196	18.5451
50.3291	36.2592		50.3291	18.6058
50.4623	41.8799		50.4623	18.6766
50.5955	48.5894		50.5955	18.7404
50.7286	56.622		50.7286	18.8056
50.8618	66.1429		50.8618	18.8783
50.9949	77.2541		50.9949	18.9534
51.1281	90.404		51.1281	19.0173
51.2612	105.513		51.2612	19.0823
51.3944	122.784		51.3944	19.1485
51.5275	142.356		51.5275	19.2129
51.6607	163.93		51.6607	19.2781
51.7938	187.773		51.7938	19.3464
51.927	213.182		51.927	19.408
52.0601	240.26		52.0601	19.4715
52.1933	267.935		52.1933	19.5415
52.3264	295.888		52.3264	19.6052
52.4596	322.997		52.4596	19.6716
52.5927	348.717		52.5927	19.7384
52.7259	371.886		52.7259	19.8044
52.859	391.492		52.859	19.8634
52.9922	406.917		52.9922	19.9318
53.1253	417.147		53.1253	20.0028
53.2585	422.051		53.2585	20.0677
53.3917	420.929		53.3917	20.1383
53.5248	413.94		53.5248	20.2055
53.658	401.362		53.658	20.2776
53.7911	383.787		53.7911	20.3496
53.9243	362.139		53.9243	20.4198
54.0574	337.45		54.0574	20.4858
54.1906	310.84		54.1906	20.5643
54.3237	283.418		54.3237	20.6349
54.4569	256.285		54.4569	20.7087
54.59	230.139		54.59	20.7808
54.7232	205.912		54.7232	20.8524
54.8563	183.866		54.8563	20.9267
54.9895	164.21		54.9895	20.9982
55.1226	147.031		55.1226	21.0674
55.2558	132.293		55.2558	21.1382
55.3889	119.713		55.3889	21.2058
55.5221	109		55.5221	21.2765
55.6552	99.9508		55.6552	21.3473
55.7884	92.1543		55.7884	21.4154
55.9215	85.3975		55.9215	21.4748
56.0547	79.4701		56.0547	21.5453
56.1879	74.1682		56.1879	21.6152
56.321	69.4257		56.321	21.6842
56.4542	65.1119		56.4542	21.7527
56.5873	61.187		56.5873	21.8221
56.7205	57.5916		56.7205	21.8987
56.8536	54.3459		56.8536	21.963
56.9868	51.4101		56.9868	22.0345
57.1199	48.7929		57.1199	22.1022
57.2531	46.4776		57.2531	22.1692
57.3862	44.4458		57.3862	22.2366
57.5194	42.6895		57.5194	22.3032
57.6525	41.1931		57.6525	22.3701
57.7857	39.8797		57.7857	22.4406
57.9188	38.7735		57.9188	22.5098
58.052	37.8388		58.052	22.5729
58.1851	37.0651		58.1851	22.6432
58.3183	36.4131		58.3183	22.7142
58.4514	35.8814		58.4514	22.7788
58.5846	35.4845		58.5846	22.8409
58.7177	35.2314		58.7177	22.9142
58.8509	35.127		58.8509	22.9859
58.9841	35.2019		58.9841	23.0525
59.1172	35.5465		59.1172	23.1177
59.2504	36.2181		59.2504	23.1838
59.3835	37.3197		59.3835	23.2509
59.5167	38.9765		59.5167	23.3159
59.6498	41.359		59.6498	23.3807
59.783	44.6523		59.783	23.4475
59.9161	49.0482		59.9161	23.5104
60.0493	54.775		60.0493	23.5772
60.1824	62.0171		60.1824	23.6488
60.3156	70.915		60.3156	23.7124
60.4487	81.7496		60.4487	23.7712
60.5819	94.3686		60.5819	23.8344
60.715	108.903		60.715	23.9032
60.8482	125.205		60.8482	23.9652
60.9813	142.859		60.9813	24.0288
61.1145	161.824		61.1145	24.0967
61.2476	181.439		61.2476	24.1542
61.3808	201.386		61.3808	24.2253
61.5139	221.008		61.5139	24.2855
61.6471	239.814		61.6471	24.3466
61.7803	257.763		61.7803	24.4045
61.9134	273.838		61.9134	24.4774
62.0466	287.831		62.0466	24.5364
62.1797	299.584		62.1797	24.5995
62.3129	308.598		62.3129	24.669
62.446	315.073		62.446	24.7265
62.5792	318.869		62.5792	24.799
62.7123	320.151		62.7123	24.8652
62.8455	319.123		62.8455	24.9347
62.9786	315.935		62.9786	24.9973
63.1118	310.788		63.1118	25.0639
63.2449	304.008		63.2449	25.1351
63.3781	295.829		63.3781	25.201
63.5112	286.395		63.5112	25.2692
63.6444	276.159		63.6444	25.3351
63.7775	265.27		63.7775	25.4062
63.9107	253.748		63.9107	25.4723
64.0438	241.901		64.0438	25.5394
64.177	229.814		64.177	25.616
64.3101	217.509		64.3101	25.687
64.4433	205.299		64.4433	25.7517
64.5764	193.042		64.5764	25.8226
64.7096	180.887		64.7096	25.8994
64.8428	168.95		64.8428	25.9657
64.9759	157.2		64.9759	26.0332
65.1091	145.799		65.1091	26.1126
65.2422	134.917		65.2422	26.1818
65.3754	124.452		65.3754	26.2474
65.5085	114.698		65.5085	26.31
65.6417	105.76		65.6417	26.3784
65.7748	97.6658		65.7748	26.4515
65.908	90.4127		65.908	26.5135
66.0411	84.0889		66.0411	26.5818
66.1743	78.5151		66.1743	26.6493
66.3074	73.7392		66.3074	26.7222
66.4406	69.6453		66.4406	26.7877
66.5737	66.1427		66.5737	26.8613
66.7069	63.1943		66.7069	26.9256
66.84	60.7392		66.84	26.9924
66.9732	58.6995		66.9732	27.0623
67.1063	57.0037		67.1063	27.129
67.2395	55.6102		67.2395	27.1849
67.3726	54.4598		67.3726	27.2523
67.5058	53.4868		67.5058	27.3212
67.639	52.6342		67.639	27.3918
67.7721	51.8982		67.7721	27.4585
67.9053	51.2178		67.9053	27.5187
68.0384	50.5967		68.0384	27.5788
68.1716	50.0244		68.1716	27.6511
68.3047	49.4725		68.3047	27.7183
68.4379	48.9595		68.4379	27.7809
68.571	48.4788		68.571	27.8544
68.7042	48.0655		68.7042	27.9231
68.8373	47.7264		68.8373	27.9857
68.9705	47.4711		68.9705	28.0572
69.1036	47.3442		69.1036	28.1211
69.2368	47.3095		69.2368	28.1879
69.3699	47.4277		69.3699	28.2556
69.5031	47.6545		69.5031	28.3201
69.6362	48.0429		69.6362	28.3826
69.7694	48.5588		69.7694	28.4505
69.9025	49.2058		69.9025	28.5159
70.0357	50.0077		70.0357	28.572
70.1688	50.9357		70.1688	28.6433
70.302	51.9883		70.302	28.7171
70.4351	53.1343		70.4351	28.7766
70.5683	54.3699		70.5683	28.8458
70.7015	55.6855		70.7015	28.9098
70.8346	57.0934		70.8346	28.9788
70.9678	58.5618		70.9678	29.0367
71.1009	60.1131		71.1009	29.1008
71.2341	61.6919		71.2341	29.1676
71.3672	63.3106		71.3672	29.2321
71.5004	64.931		71.5004	29.3052
71.6335	66.5367		71.6335	29.3623
71.7667	68.0821		71.7667	29.4276
71.8998	69.5305		71.8998	29.5045
72.033	70.8599		72.033	29.5568
72.1661	72.0343		72.1661	29.6311
72.2993	73.0341		72.2993	29.695
72.4324	73.8864		72.4324	29.7542
72.5656	74.5813		72.5656	29.8107
72.6987	75.1568		72.6987	29.8817
72.8319	75.6439		72.8319	29.9483
72.9651	76.0213		72.9651	30.0159
73.0982	76.291		73.0982	30.0916
73.2314	76.4734		73.2314	30.1486
73.3645	76.5637		73.3645	30.2212
73.4977	76.6025		73.4977	30.2874
73.6308	76.6356		73.6308	30.3541
73.764	76.6879		73.764	30.4182
73.8971	76.7765		73.8971	30.4758
74.0303	76.9265		74.0303	30.5377
74.1634	77.1493		74.1634	30.6085
74.2966	77.4496		74.2966	30.6628
74.4297	77.8411		74.4297	30.737
74.5629	78.3312		74.5629	30.7917
74.696	78.9256		74.696	30.8654
74.8292	79.5706		74.8292	30.9257
74.9623	80.3306		74.9623	30.9884
75.0955	81.1469		75.0955	31.0632
75.2286	82.0427		75.2286	31.1209
75.3618	82.9587		75.3618	31.1797
75.4949	83.9397		75.4949	31.2404
75.6281	84.9395		75.6281	31.3077
75.7612	85.9708		75.7612	31.3708
75.8944	87.0282		75.8944	31.4364
76.0276	88.0877		76.0276	31.506
76.1607	89.141		76.1607	31.5727
76.2939	90.1753		76.2939	31.6302
76.427	91.1546		76.427	31.7033
76.5602	92.123		76.5602	31.7585
76.6933	92.9931		76.6933	31.8273
76.8265	93.832		76.8265	31.8907
76.9596	94.5787		76.9596	31.9493
77.0928	95.2541		77.0928	32.0265
77.2259	95.8224		77.2259	32.0925
77.3591	96.2979		77.3591	32.1513
77.4922	96.6692		77.4922	32.2136
77.6254	96.972		77.6254	32.2772
77.7585	97.1909		77.7585	32.3443
77.8917	97.3228		77.8917	32.4111
78.0248	97.3495		78.0248	32.4758
78.158	97.3031		78.158	32.539
78.2911	97.1882		78.2911	32.5983
78.4243	97.0262		78.4243	32.6711
78.5574	96.8061		78.5574	32.7314
78.6906	96.591		78.6906	32.798
78.8238	96.3426		78.8238	32.8679
78.9569	96.0656		78.9569	32.9317
79.0901	95.769		79.0901	32.9916
79.2232	95.467		79.2232	33.0617
79.3564	95.1688		79.3564	33.12
79.4895	94.8902		79.4895	33.188
79.6227	94.5749		79.6227	33.2561
79.7558	94.2797		79.7558	33.3246
79.889	93.9818		79.889	33.3901
80.0221	93.6828		80.0221	33.4469
80.1553	93.3566		80.1553	33.5149
80.2884	93.0287		80.2884	33.5807
80.4216	92.6518		80.4216	33.6428
80.5547	92.2403		80.5547	33.7176
80.6879	91.7365		80.6879	33.7777
80.821	91.1659		80.821	33.8463
80.9542	90.5016		80.9542	33.9086
81.0873	89.7401		81.0873	33.97
81.2205	88.8455		81.2205	34.031
81.3536	87.78		81.3536	34.0998
81.4868	86.4989		81.4868	34.168
81.6199	84.9659		81.6199	34.2409
81.7531	83.1452		81.7531	34.3039
81.8863	81.0262		81.8863	34.367
82.0194	78.6411		82.0194	34.4325
82.1526	76.0197		82.1526	34.4897
82.2857	73.2514		82.2857	34.5607
82.4189	70.3822		82.4189	34.6229
82.552	67.5468		82.552	34.6909
82.6852	64.8505		82.6852	34.7534
82.8183	62.3704		82.8183	34.8188
82.9515	60.166		82.9515	34.8857
83.0846	58.2867		83.0846	34.9497
83.2178	56.7481		83.2178	35.0184
83.3509	55.5531		83.3509	35.0838
83.4841	54.614		83.4841	35.1487
83.6172	53.9439		83.6172	35.2066
83.7504	53.5661		83.7504	35.2763
83.8835	53.4583		83.8835	35.3304
84.0167	53.6005		84.0167	35.4055
84.1498	53.9826		84.1498	35.4603
84.283	54.6346		84.283	35.5275
84.4162	55.5399		84.4162	35.5815
84.5493	56.6995		84.5493	35.6434
84.6825	58.1476		84.6825	35.7122
84.8156	59.8588		84.8156	35.768
84.9488	61.8359		84.9488	35.8374
85.0819	64.0544		85.0819	35.9065
85.2151	66.4818		85.2151	35.9593
85.3482	69.1051		85.3482	36.0277
85.4814	71.8912		85.4814	36.0822
85.6145	74.7593		85.6145	36.1505
85.7477	77.7378		85.7477	36.2144
85.8808	80.7719		85.8808	36.2624
86.014	83.811		86.014	36.3233
86.1471	86.8231		86.1471	36.3908
86.2803	89.7968		86.2803	36.4432
86.4134	92.6616		86.4134	36.5121
86.5466	95.3604		86.5466	36.5581
86.6797	97.8452		86.6797	36.6335
86.8129	100.198		86.8129	36.6852
86.946	102.344		86.946	36.7503
87.0792	104.344		87.0792	36.8119
87.2123	106.203		87.2123	36.8698
87.3455	107.882		87.3455	36.9191
87.4787	109.335		87.4787	36.9865
87.6118	110.623		87.6118	37.0448
87.745	111.72		87.745	37.1054
87.8781	112.629		87.8781	37.1657
88.0113	113.358		88.0113	37.2365
88.1444	113.866		88.1444	37.298
88.2776	114.19		88.2776	37.365
88.4107	114.306		88.4107	37.4265
88.5439	114.221		88.5439	37.4822
88.677	113.958		88.677	37.5445
88.8102	113.491		88.8102	37.6024
88.9433	112.816		88.9433	37.6761
89.0765	111.885		89.0765	37.7386
89.2096	110.665		89.2096	37.8079
89.3428	109.131		89.3428	37.8705
89.4759	107.289		89.4759	37.9286
89.6091	105.121		89.6091	37.9944
89.7422	102.668		89.7422	38.0657
89.8754	99.9434		89.8754	38.1272
90.0086	96.9681		90.0086	38.201
90.1417	93.724		90.1417	38.2619
90.2749	90.2522		90.2749	38.3327
90.408	86.6103		90.408	38.3853
90.5412	82.858		90.5412	38.4652
90.6743	78.9703		90.6743	38.5269
90.8075	75.0675		90.8075	38.5981
90.9406	71.1009		90.9406	38.6596
91.0738	67.1347		91.0738	38.7329
91.2069	63.1864		91.2069	38.797
91.3401	59.3421		91.3401	38.8654
91.4732	55.5799		91.4732	38.9333
91.6064	51.9373		91.6064	38.9987
91.7395	48.4855		91.7395	39.0651
91.8727	45.1402		91.8727	39.1277
92.0058	41.9458		92.0058	39.2017
92.139	38.9286		92.139	39.2663
92.2721	36.0856		92.2721	39.3324
92.4053	33.4153		92.4053	39.4002
92.5384	30.8826		92.5384	39.4724
92.6716	28.559		92.6716	39.5411
92.8048	26.3675		92.8048	39.6103
92.9379	24.3785		92.9379	39.6784
93.0711	22.5125		93.0711	39.7399
93.2042	20.8403		93.2042	39.8006
93.3374	19.3195		93.3374	39.8687
93.4705	17.9185		93.4705	39.9441
93.6037	16.6524		93.6037	40.012
93.7368	15.5098		93.7368	40.0905
93.87	14.498		93.87	40.1564
94.0031	13.5737		94.0031	40.2276
94.1363	12.7286		94.1363	40.2928
94.2694	11.9766		94.2694	40.3571
94.4026	11.2933		94.4026	40.4269
94.5357	10.6644		94.5357	40.5026
94.6689	10.0896		94.6689	40.572
94.802	9.58154		94.802	40.6463
94.9352	9.10855		94.9352	40.7153
95.0683	8.66376		95.0683	40.7788
95.2015	8.26238		95.2015	40.843
95.3346	7.88178		95.3346	40.9047
95.4678	7.55443		95.4678	40.9702
95.601	7.24885		95.601	41.0469
95.7341	6.97215		95.7341	41.1086
95.8673	6.71523		95.8673	41.174
96.0004	6.49084		96.0004	41.2352
96.1336	6.41462		96.1336	42.2482
96.2667	6.43172		96.2667	41.8357
96.3999	6.39345		96.3999	41.8183
96.533	6.26133		96.533	41.8281
96.6662	6.11344		96.6662	41.8354
96.7993	5.97391		96.7993	41.8669
96.9325	5.85378		96.9325	41.9216
97.0656	5.80019		97.0656	41.9644
97.1988	6.30138		97.1988	42.0116
97.3319	7.13181		97.3319	42.0633
97.4651	7.19631		97.4651	42.1313
97.5982	6.71917		97.5982	42.1805
97.7314	6.08678		97.7314	42.2326
97.8645	5.56474		97.8645	42.2924
97.9977	5.21621		97.9977	42.3462
98.1308	4.99731		98.1308	42.4068
98.264	4.83243		98.264	42.4731
98.3972	4.71946		98.3972	42.5293
98.5303	4.63518		98.5303	42.5809
98.6635	4.54955		98.6635	42.6411
98.7966	4.49385		98.7966	42.7056
98.9298	4.45211		98.9298	42.7607
99.0629	4.41491		99.0629	42.8172
99.1961	4.36885		99.1961	42.8906
99.3292	4.32625		99.3292	42.9433
99.4624	4.27802		99.4624	43.0113
99.5955	4.22829		99.5955	43.0687
99.7287	4.16088		99.7287	43.1262
99.8618	4.09628		99.8618	43.1894
99.995	4.03336		99.995	43.2374
100.128	3.97422		100.128	43.3155
100.261	3.90459		100.261	43.379
100.394	3.83692		100.394	43.4472
100.528	3.78298		100.528	43.5155
100.661	3.7325		100.661	43.5769
100.794	3.67751		100.794	43.6679
100.927	3.63444		100.927	43.7599
101.06	3.57273		101.06	43.8743
101.193	3.48748		101.193	43.9844
101.327	3.38199		101.327	44.0777
101.46	3.2691		101.46	44.125
101.593	3.17754		101.593	44.1387
101.726	3.09198		101.726	44.1404
101.859	3.01201		101.859	44.1478
101.992	2.96444		101.992	44.1738
102.125	2.91851		102.125	44.2143
102.259	2.88913		102.259	44.2675
102.392	2.86548		102.392	44.2997
102.525	2.86225		102.525	44.3573
102.658	2.83572		102.658	44.425
102.791	2.83301		102.791	44.4929
102.924	2.8007		102.924	44.5507
103.057	2.80473		103.057	44.6092
103.191	2.79667		103.191	44.6732
103.324	2.79847		103.324	44.7415
103.457	2.78958		103.457	44.8056
103.59	2.78447		103.59	44.8619
103.723	2.79929		103.723	44.9247
103.856	2.93096		103.856	45.6045
103.99	2.96621		103.99	45.4344
104.123	3.06951		104.123	45.7989
104.256	3.03116		104.256	45.701
104.389	2.99839		104.389	45.5915
104.522	2.98331		104.522	45.5575
104.655	2.99453		104.655	45.5581
104.788	3.06359		104.788	45.6006
104.922	3.3186		104.922	45.6333
105.055	3.60312		105.055	45.6866
105.188	3.65816		105.188	45.7421
105.321	3.62024		105.321	45.7995
105.454	3.59034		105.454	45.8625
105.587	3.58843		105.587	45.9185
105.721	3.67176		105.721	45.9776
105.854	3.80733		105.854	46.0414
105.987	3.9742		105.987	46.0843
106.12	4.1579		106.12	46.1274
106.253	4.3868		106.253	46.1706
106.386	4.62092		106.386	46.2192
106.519	4.88235		106.519	46.2511
106.653	5.13895		106.653	46.2848
106.786	5.39275		106.786	46.3124
106.919	5.64127		106.919	46.3479
107.052	5.91424		107.052	46.3568
107.185	6.14516		107.185	46.388
107.318	6.30585		107.318	46.4073
107.452	6.38499		107.452	46.4212
107.585	6.38329		107.585	46.4384
107.718	6.36472		107.718	46.4419
107.851	6.30333		107.851	46.4715
107.984	6.23371		107.984	46.4793
108.117	6.25023		108.117	46.4833
108.25	6.39777		108.25	46.5185
108.384	7.00928		108.384	46.6042
108.517	8.65487		108.517	46.8316
108.65	12.1098		108.65	47.3391
108.783	18.3354		108.783	48.2438
108.916	34.4833		108.916	49.6617
109.049	77.3991		109.049	51.4997
109.182	154.047		109.182	53.6555
109.316	239.06		109.316	55.9703
109.449	286.063		109.449	58.2332
109.582	277.968		109.582	60.4299
109.715	233.486		109.715	62.4304
109.848	181.003		109.848	64.2742
109.981	135.402		109.981	65.921
110.115	101.158		110.115	67.3967
110.248	76.9393		110.248	68.7193
110.381	60.12		110.381	69.8911
110.514	48.3911		110.514	70.9204
110.647	40.1436		110.647	71.8687
110.78	34.1753		110.78	72.7015
110.913	29.7403		110.913	73.4433
111.047	26.3549		111.047	74.1149
111.18	23.7095		111.18	74.7036
111.313	21.5766		111.313	75.2226
111.446	19.8239		111.446	75.7031
111.579	18.3442		111.579	76.1149
111.712	17.1223		111.712	76.5033
111.846	16.0414		111.846	76.8065
111.979	15.128		111.979	77.1034
112.112	14.3067		112.112	77.3826
112.245	13.5908		112.245	77.6268
112.378	12.9494		112.378	77.8265
112.511	12.3706		112.511	78.0048
112.644	11.8601		112.644	78.1888
112.778	11.3816		112.778	78.3288
112.911	10.9403		112.911	78.4707
113.044	10.5265		113.044	78.5968
113.177	10.1584		113.177	78.6976
113.31	9.813		113.31	78.7823
113.443	9.50029		113.443	78.8863
113.577	9.21207		113.577	78.946
113.71	8.93076		113.71	79.0157
113.843	8.6617		113.843	79.0807
113.976	8.42554		113.976	79.1455
114.109	8.18557		114.109	79.1681
114.242	7.97282		114.242	79.2311
114.375	7.76418		114.375	79.2586
114.509	7.56959		114.509	79.3017
114.642	7.36644		114.642	79.3193
114.775	7.20529		114.775	79.3509
114.908	7.03058		114.908	79.3621
115.041	6.87111		115.041	79.3933
115.174	6.72226		115.174	79.4036
115.308	6.55729		115.308	79.4257
115.441	6.42273		115.441	79.4552
115.574	6.28092		115.574	79.45
115.707	6.15031		115.707	79.4759
115.84	6.02649		115.84	79.4955
115.973	5.90616		115.973	79.493
116.106	5.79484		116.106	79.4741
116.24	5.69187		116.24	79.5042
116.373	5.58889		116.373	79.5016
116.506	5.47123		116.506	79.5068
116.639	5.3645		116.639	79.5165
116.772	5.27736		116.772	79.5205
116.905	5.16912		116.905	79.531
117.038	5.08832		117.038	79.5317
117.172	4.99081		117.172	79.5381
117.305	4.91145		117.305	79.5586
117.438	4.82972		117.438	79.5479
117.571	4.72428		117.571	79.5578
117.704	4.65649		117.704	79.5548
117.837	4.57396		117.837	79.5506
117.971	4.51054		117.971	79.5637
118.104	4.43924		118.104	79.554
118.237	4.3605		118.237	79.5677
118.37	4.29273		118.37	79.5639
118.503	4.22481		118.503	79.5638
118.636	4.15941		118.636	79.5762
118.769	4.10322		118.769	79.5333
118.903	4.02926		118.903	79.5422
119.036	3.9775		119.036	79.5554
119.169	3.91627		119.169	79.5589
119.302	3.85815		119.302	79.5632
119.435	3.82071		119.435	79.564
119.568	3.7614		119.568	79.5594
119.702	3.70287		119.702	79.5619
119.835	3.64692		119.835	79.5594
119.968	3.60538		119.968	79.5672
120.101	3.548		120.101	79.5604
120.234	3.49523		120.234	79.5509
120.367	3.45353		120.367	79.5616
120.5	3.40746		120.5	79.5533
120.634	3.36803		120.634	79.5579
120.767	3.3212		120.767	79.5571
120.9	3.27883		120.9	79.575

## Sheet: Fig1d
wavelength	0	42	102	162	222	282	402	582	867
799.991	2.5148e-06	-5.246e-07	-3.6226e-06	9.1632e-06	-4.5718e-06	-6.1228e-06	9.5514e-06	-8.9786e-06	1.6112e-06
798.012	-0.00488	0.000906986	0.000177337	0.000145419	-0.00338	-0.00224	-0.00422	0.00406	0.0024
795.996	-0.00102	0.00488	0.00564	0.00434	3.49758e-05	-0.000848814	0.00358	0.00204	0.00156
794.014	-0.00546	-0.00131	0.00526	0.00096856	-0.000135881	-0.00246	-0.00138	-0.00184	0.00422
791.996	0.00232	0.00258	0.00574	0.00354	0.000458496	0.00428	0.00238	0.0046	0.00372
790.011	-0.00145	-0.0045	0.00524	0.000480158	-0.00368	-0.00278	-0.00414	0.000844172	0.00080082
787.989	-0.00394	-0.00175	0.00252	-0.00123	0.00206	0.000329124	0.000162288	0.0018	0.00102
786.001	-0.00486	0.0033	0.00346	-0.00139	-0.0026	0.00183	0.00376	0.00252	0.00312
784.011	0.0022	0.0038	0.0037	0.00376	-0.000131887	-0.00096704	0.00452	0.00292	0.00526
781.985	0.00342	0.00118	0.001	0.0031	-0.00394	0.00266	-0.00050296	-0.000133165	0.00436
779.992	-0.00145	0.00060023	0.00466	0.00286	-0.00274	0.00238	0.00294	0.00131	0.00181
777.997	-0.00306	0.00114	0.00608	0.00656	0.00147	0.0021	0.00452	0.0042	0.00252
776.001	-0.000606198	-0.00128	0.000651314	0.00324	-0.00101	0.00262	0.00131	0.00137	0.00298
774.004	0.00188	0.0027	0.000309242	0.00438	0.00208	0.00364	0.00268	0.00264	0.00412
772.005	0.0042	1.353e-06	0.00514	0.00372	0.000993478	0.00414	0.00392	0.00522	0.00732
770.004	0.005	0.000515474	0.00548	0.00688	-0.00208	0.00334	0.00248	0.0035	0.00664
768.002	0.000477474	0.00113	0.00334	0.00111	-0.00234	0.000844614	0.00298	0.0061	6.9203e-05
765.999	0.00232	0.00508	0.00736	0.00666	-0.00121	0.0042	0.00324	0.00183	0.00236
763.994	0.0049	-0.00218	0.00674	0.00105	0.00082742	-0.00248	0.00129	0.0027	0.00178
761.987	0.00109	0.000700814	0.00502	0.00584	0.00125	-0.00212	0.0045	0.0034	0.000949056
760.015	0.0044	0.00404	0.0071	0.00636	0.00312	0.00238	0.00582	0.00188	0.00204
758.005	0.00532	0.0031	0.00742	0.00464	0.00506	0.00314	0.00312	0.0051	0.00484
755.994	0.00484	0.00082798	0.00664	0.00696	-0.000858944	0.0039	0.00536	0.0074	0.0049
754.017	0.00248	0.00646	0.0052	0.00666	0.00158	0.00258	0.0062	0.00638	0.00518
752.003	-0.00324	0.00486	0.00592	0.00326	-0.00157	0.000345306	0.00324	0.00802	0.00438
749.988	0.00482	0.00776	0.00584	0.00528	0.00262	-0.00033508	0.0062	0.0049	0.00372
748.006	0.00268	0.00138	0.0093	0.0039	-0.000145477	-0.00107	0.00762	0.00478	0.00466
745.988	-0.00107	0.00598	0.00718	0.0053	0.0013	-0.00037755	0.00514	0.00432	0.00484
744.004	0.00133	0.0047	0.00542	0.00468	0.0022	0.00282	0.00448	0.0084	0.00502
741.982	0.00458	0.00242	0.0079	0.0078	0.0023	0.00144	0.00356	0.009	0.00694
739.995	0.0053	0.00516	0.00514	0.0083	0.00111	0.0038	0.0049	0.00864	0.00656
738.007	0.00444	0.00838	0.00694	0.00418	0.00316	0.00352	0.0037	0.0063	0.0081
736.017	0.00296	0.00432	0.00628	0.00402	-0.00132	0.0021	0.00478	0.00682	0.00326
733.99	0.00288	0.00654	0.01132	0.0089	0.00131	0.000289904	0.00378	0.0052	0.00652
731.997	0.00302	0.00396	0.00604	0.00648	-0.00025965	-0.000212354	0.00394	0.00364	0.00612
730.003	0.003	0.00354	0.00784	0.00732	0.00398	0.00376	0.00966	0.00584	0.00732
728.008	0.00416	0.00544	0.00698	0.00896	0.00514	0.00234	0.00502	0.00664	0.00738
726.011	0.0027	0.00486	0.00286	0.00196	0.00362	0.00153	0.00576	0.00756	0.00602
724.013	0.00524	0.00632	0.00604	0.00914	0.00778	0.00442	0.01128	0.00626	0.008
722.013	0.00596	0.00794	0.01026	0.00908	0.00442	0.00668	0.00874	0.00812	0.0102
720.012	0.00526	0.00548	0.00744	0.00618	0.00123	0.00151	0.00726	0.0106	0.00538
718.01	0.00524	0.0048	0.01018	0.00656	0.00125	0.00102	0.0055	0.00484	0.00594
716.006	0.00604	0.00668	0.00902	0.0068	0.00248	0.000866608	0.00668	0.00686	0.0058
714.001	0.0066	0.00442	0.00462	0.007	0.0015	0.00468	0.00578	0.00572	0.00664
711.994	0.00918	0.00654	0.011	0.00886	0.00322	0.0035	0.0059	0.00864	0.0092
709.987	0.0083	0.00748	0.0096	0.01	0.00366	0.00358	0.01048	0.00914	0.00816
708.013	0.00514	0.00868	0.00806	0.00996	0.00346	0.00552	0.00518	0.00666	0.00832
706.003	0.00884	0.00464	0.00974	0.01012	0.0053	0.00792	0.00804	0.01134	0.00666
703.991	0.00456	0.00888	0.00632	0.01166	0.00594	0.00304	0.01124	0.00908	0.01102
702.014	0.00964	0.00368	0.00804	0.014	0.00638	0.00662	0.01212	0.00982	0.00968
700	0.00366	0.00756	0.0074	0.01134	0.00338	0.00522	0.01122	0.00658	0.00712
697.984	0.00356	0.00544	0.00696	0.00882	0.00588	0.0036	0.00892	0.00922	0.00776
696.003	0.00914	0.0105	0.0115	0.0151	0.00668	0.00546	0.01024	0.0123	0.00896
693.985	0.0053	0.00806	0.01044	0.01338	0.00454	0.0056	0.01544	0.0127	0.01098
692.001	0.00674	0.01064	0.01096	0.01508	0.01284	0.00816	0.00918	0.01618	0.00864
690.016	0.00686	0.00794	0.0134	0.01556	0.00798	0.008	0.00968	0.01468	0.0124
687.994	0.00848	0.00544	0.01162	0.0146	0.01022	0.0093	0.01268	0.01522	0.01252
686.007	0.00568	0.01412	0.0127	0.01376	0.0099	0.00996	0.01512	0.01658	0.01322
683.982	0.0103	0.01262	0.01856	0.01488	0.01534	0.01124	0.01954	0.01792	0.01524
681.992	0.00966	0.00978	0.01414	0.01876	0.01536	0.01526	0.01742	0.0204	0.01466
680.001	0.00165	0.01024	0.01898	0.01758	0.01668	0.01322	0.0171	0.01918	0.017
678.009	0.00852	0.01002	0.02038	0.01886	0.0182	0.0172	0.02208	0.02186	0.01352
676.015	0.0033	0.01028	0.02	0.02068	0.01772	0.01912	0.02094	0.02038	0.01556
673.984	0.0102	0.01492	0.02028	0.02364	0.02272	0.01988	0.02644	0.03026	0.0225
671.988	0.00478	0.0162	0.02368	0.02916	0.02706	0.02384	0.02938	0.02736	0.02656
669.991	0.00512	0.01266	0.02384	0.0258	0.02824	0.02418	0.03096	0.02918	0.02672
667.992	0.01228	0.0224	0.03346	0.03494	0.03258	0.03222	0.03676	0.03696	0.03006
665.993	0.0124	0.02054	0.03252	0.03922	0.03902	0.03596	0.04498	0.03824	0.03388
663.992	0.01456	0.02594	0.03786	0.04384	0.04558	0.04448	0.05128	0.04698	0.04104
661.99	0.01106	0.0233	0.04364	0.04236	0.0437	0.04264	0.05146	0.04958	0.03694
659.986	0.01208	0.02096	0.03564	0.04926	0.04962	0.04948	0.05586	0.0556	0.0429
658.018	0.0156	0.02758	0.0451	0.05198	0.05286	0.05798	0.06532	0.05724	0.04732
656.012	0.01214	0.03436	0.05254	0.0578	0.06026	0.06274	0.06738	0.06116	0.0522
654.005	0.01806	0.03948	0.05312	0.06576	0.07216	0.07018	0.07696	0.07324	0.05478
651.997	0.01148	0.03286	0.05484	0.06634	0.07028	0.07168	0.07822	0.0728	0.05966
649.988	0.0204	0.03842	0.0627	0.07708	0.07618	0.07878	0.08482	0.08116	0.06492
648.014	0.01574	0.0445	0.06614	0.07722	0.08234	0.08256	0.0917	0.0873	0.07124
646.002	0.02044	0.0451	0.07074	0.08614	0.0902	0.09226	0.0959	0.09358	0.07554
643.989	0.01976	0.04694	0.07388	0.0866	0.09254	0.09502	0.09706	0.0983	0.0761
642.012	0.01708	0.04556	0.075	0.09362	0.09684	0.09582	0.10278	0.10316	0.07946
639.997	0.02072	0.05098	0.07824	0.09516	0.09868	0.10126	0.11028	0.10196	0.0818
638.017	0.02428	0.0498	0.08036	0.09818	0.10336	0.10684	0.11002	0.10516	0.08462
636	0.02126	0.04874	0.07978	0.09704	0.10558	0.10534	0.10918	0.10668	0.08476
634.018	0.0198	0.05332	0.08342	0.09692	0.10284	0.10908	0.11038	0.10854	0.08602
631.998	0.02674	0.05574	0.0813	0.09662	0.10694	0.10724	0.1139	0.10924	0.08726
630.014	0.02214	0.054	0.0838	0.0957	0.10562	0.10822	0.11014	0.10926	0.08426
627.992	0.02244	0.05198	0.08242	0.09856	0.10152	0.10206	0.1107	0.10738	0.08206
626.005	0.02128	0.04944	0.084	0.09916	0.10248	0.10728	0.11144	0.10494	0.08418
624.018	0.01946	0.04922	0.08138	0.10002	0.10062	0.10244	0.11158	0.10748	0.07976
621.992	0.02232	0.05408	0.07818	0.09404	0.09928	0.09988	0.10358	0.10168	0.08302
620.003	0.02426	0.05186	0.08214	0.09412	0.10036	0.10512	0.10564	0.10272	0.08492
618.012	0.02266	0.05028	0.0785	0.09368	0.0972	0.09882	0.10322	0.10218	0.07874
615.983	0.0211	0.04974	0.07726	0.0938	0.09806	0.10004	0.10512	0.10212	0.08046
613.99	0.02088	0.04888	0.07322	0.08916	0.09414	0.09932	0.10168	0.0975	0.07776
611.996	0.02272	0.04712	0.07794	0.0924	0.09738	0.09506	0.10394	0.09624	0.07842
610.001	0.01878	0.04666	0.07676	0.08726	0.09196	0.0954	0.09672	0.0975	0.07444
608.004	0.027	0.04978	0.07616	0.09432	0.09594	0.09706	0.0994	0.10238	0.07982
606.007	0.02432	0.0481	0.07898	0.0931	0.09334	0.09512	0.10436	0.10192	0.08098
604.009	0.01998	0.04764	0.07854	0.09016	0.09742	0.09284	0.09796	0.1	0.0808
602.009	0.02456	0.04932	0.078	0.09278	0.09906	0.0987	0.10482	0.1021	0.07986
600.009	0.0252	0.04802	0.0805	0.09542	0.10002	0.10278	0.10728	0.1015	0.0846
598.007	0.02872	0.05144	0.08152	0.09614	0.10314	0.10492	0.11098	0.10412	0.0863
596.005	0.02172	0.05086	0.0786	0.09726	0.09848	0.10008	0.10386	0.10412	0.08114
594.001	0.0255	0.05066	0.08146	0.09578	0.1019	0.10144	0.10938	0.1059	0.08114
591.996	0.0228	0.05106	0.08462	0.09412	0.10294	0.10566	0.1115	0.10928	0.08412
589.991	0.01926	0.0573	0.08416	0.096	0.1021	0.1055	0.11058	0.10684	0.08722
587.984	0.02594	0.05572	0.08258	0.09706	0.10366	0.10468	0.11434	0.11212	0.08734
586.013	0.02892	0.0545	0.08174	0.10034	0.10756	0.11036	0.11396	0.1079	0.09126
584.004	0.0203	0.05356	0.08012	0.09898	0.10664	0.1056	0.1112	0.1023	0.08752
581.995	0.03114	0.05304	0.08656	0.09774	0.10518	0.10696	0.1143	0.11062	0.08772
579.984	0.02886	0.05708	0.08598	0.1006	0.10482	0.11048	0.11306	0.1097	0.08852
578.009	0.02196	0.05812	0.08526	0.1017	0.10312	0.11104	0.11226	0.10854	0.0858
575.996	0.0243	0.0558	0.0791	0.10014	0.10248	0.10266	0.10806	0.10692	0.08998
573.982	0.02744	0.05852	0.08364	0.09422	0.09858	0.10212	0.10498	0.10408	0.08378
572.005	0.02088	0.05432	0.07826	0.09476	0.09592	0.0984	0.10346	0.0982	0.0827
569.989	0.02198	0.05276	0.07564	0.08962	0.09294	0.09422	0.10032	0.09182	0.07582
568.009	0.0193	0.05358	0.0792	0.09138	0.0937	0.09446	0.10034	0.0988	0.08054
565.992	0.02116	0.0502	0.07652	0.0882	0.09132	0.09134	0.09608	0.09552	0.07778
564.01	0.0221	0.05066	0.0714	0.08542	0.08676	0.08854	0.09422	0.08764	0.07362
561.99	0.02128	0.05246	0.07306	0.08282	0.08744	0.08514	0.09478	0.0904	0.07452
560.007	0.0167	0.04914	0.07236	0.0785	0.08402	0.08358	0.09174	0.08362	0.0714
557.985	0.02202	0.05026	0.07344	0.0828	0.08708	0.08698	0.09368	0.08752	0.07332
556	0.02586	0.05152	0.06896	0.0845	0.08482	0.08766	0.09268	0.0911	0.0707
554.013	0.02094	0.05132	0.07348	0.08244	0.08586	0.0831	0.0913	0.08644	0.0702
551.989	0.02174	0.0477	0.07186	0.07394	0.0784	0.08252	0.08456	0.08272	0.06956
550.001	0.02824	0.04904	0.07154	0.0788	0.08336	0.08502	0.08836	0.08538	0.0709
548.012	0.02692	0.05352	0.07274	0.07734	0.07948	0.08382	0.08654	0.08676	0.07022
545.984	0.02508	0.04762	0.07118	0.08006	0.07978	0.08228	0.08228	0.08172	0.0687
543.993	0.0282	0.0544	0.0735	0.0768	0.08124	0.08274	0.08948	0.08744	0.07174
542.001	0.02478	0.04842	0.06898	0.076	0.08096	0.0781	0.08348	0.08322	0.07034
540.008	0.01966	0.04766	0.06718	0.07216	0.07688	0.07354	0.08312	0.07914	0.06892
538.015	0.0265	0.04932	0.07026	0.07766	0.07904	0.08104	0.08654	0.08458	0.07184
535.983	0.02106	0.04806	0.06088	0.07488	0.07574	0.0766	0.08636	0.08316	0.0677
533.987	0.02464	0.0489	0.07048	0.07606	0.08106	0.08212	0.08444	0.08624	0.07018
531.991	0.02406	0.0501	0.06806	0.07298	0.07622	0.08022	0.08108	0.08048	0.06738
529.993	0.03166	0.05554	0.07578	0.08136	0.07982	0.0819	0.0871	0.08196	0.07492
527.995	0.01928	0.0418	0.0637	0.0723	0.07378	0.0721	0.07438	0.06958	0.06368
525.996	0.02398	0.04586	0.06922	0.07414	0.07842	0.07756	0.08202	0.0787	0.07048
523.996	0.0288	0.0493	0.07102	0.07844	0.08004	0.0796	0.08552	0.0848	0.06768
521.995	0.02996	0.05146	0.06822	0.07972	0.077	0.08	0.08134	0.0843	0.0735
519.993	0.03578	0.05472	0.07548	0.0856	0.08498	0.08422	0.08964	0.08742	0.07464
517.99	0.03092	0.0527	0.07258	0.08178	0.0806	0.08566	0.08814	0.08498	0.07388
515.987	0.02464	0.05358	0.07394	0.0832	0.08328	0.08294	0.0872	0.0872	0.07526
513.982	0.0292	0.05798	0.08078	0.0869	0.08914	0.0892	0.09256	0.0915	0.0769
512.015	0.03236	0.05548	0.0754	0.08656	0.08914	0.09006	0.09552	0.09152	0.07638
510.009	0.0268	0.05754	0.07866	0.08948	0.09064	0.08812	0.09602	0.09554	0.08032
508.002	0.03544	0.0606	0.0857	0.091	0.09412	0.09402	0.10028	0.09996	0.08296
505.994	0.0353	0.06536	0.0848	0.0962	0.0964	0.1001	0.10512	0.09796	0.08618
503.985	0.04464	0.06538	0.09014	0.09908	0.09832	0.0983	0.10546	0.10194	0.08536
502.014	0.04152	0.07382	0.08984	0.1023	0.10254	0.10358	0.1055	0.1012	0.0858
500.003	0.05056	0.07184	0.09442	0.10078	0.1035	0.10428	0.11256	0.11286	0.08954
497.992	0.05392	0.0833	0.10468	0.10662	0.11084	0.10748	0.1087	0.10662	0.09134
496.018	0.06624	0.0871	0.10456	0.10846	0.11104	0.11202	0.1102	0.1064	0.09032
494.005	0.07428	0.09488	0.116	0.11682	0.1179	0.11284	0.11612	0.1136	0.09786
491.991	0.09518	0.11364	0.12142	0.12468	0.12364	0.12178	0.12004	0.11996	0.1007
490.015	0.11038	0.12342	0.1326	0.1297	0.13072	0.12182	0.12042	0.11482	0.10076
487.999	0.14802	0.1556	0.15456	0.15202	0.14326	0.13934	0.1366	0.12664	0.109
485.983	0.17284	0.17176	0.1662	0.1618	0.1493	0.13674	0.1309	0.12416	0.10524
484.004	0.20448	0.20266	0.19172	0.17372	0.16142	0.14962	0.14004	0.1293	0.11082
481.986	0.22254	0.21628	0.19718	0.17712	0.1595	0.1487	0.13916	0.12578	0.10302
480.005	0.2565	0.23966	0.21768	0.19638	0.1776	0.16032	0.14234	0.13212	0.11106
477.986	0.27324	0.24942	0.2279	0.20384	0.18066	0.16666	0.14758	0.13824	0.11566
476.004	0.28042	0.2651	0.23328	0.20456	0.17968	0.16582	0.14978	0.1342	0.11456
473.983	0.2893	0.26612	0.23448	0.20694	0.18522	0.17214	0.1542	0.14	0.11774
471.999	0.28788	0.26304	0.23112	0.205	0.1833	0.16738	0.15086	0.13806	0.11698
470.014	0.28676	0.2591	0.23662	0.20612	0.19104	0.16544	0.1478	0.1395	0.11526
467.991	0.27946	0.2619	0.2301	0.20182	0.1819	0.16614	0.1499	0.1395	0.11734
466.005	0.27456	0.26034	0.22946	0.20066	0.1783	0.16256	0.15172	0.13984	0.11506
464.018	0.2723	0.25412	0.2246	0.20092	0.17872	0.16162	0.14882	0.1395	0.11784
461.992	0.27552	0.25434	0.22662	0.20398	0.1817	0.16252	0.15102	0.14362	0.11964
460.004	0.26996	0.25686	0.22948	0.20198	0.18002	0.16836	0.15428	0.13878	0.12114
458.015	0.28294	0.26018	0.22814	0.20026	0.1827	0.16296	0.15604	0.13924	0.1209
455.987	0.29568	0.27548	0.24116	0.21078	0.19152	0.1688	0.15766	0.14344	0.1199
453.996	0.31422	0.2845	0.24918	0.2197	0.1959	0.17662	0.15642	0.14726	0.1262
452.005	0.32974	0.29846	0.25882	0.22826	0.20248	0.17908	0.16168	0.14496	0.12622
450.013	0.33784	0.3047	0.26692	0.23182	0.20146	0.18368	0.15838	0.15742	0.12878
447.982	0.3489	0.3136	0.27002	0.2332	0.20602	0.1843	0.16554	0.15448	0.13276
445.988	0.35136	0.30948	0.26884	0.2279	0.2018	0.18116	0.1631	0.14836	0.13114
443.994	0.34548	0.309	0.26302	0.23188	0.2021	0.17806	0.15796	0.14042	0.12696
441.999	0.34062	0.3033	0.26208	0.2271	0.19602	0.18128	0.1617	0.14698	0.1261
440.003	0.3296	0.29394	0.2509	0.22088	0.1922	0.17488	0.1557	0.14392	0.1284
438.007	0.32606	0.28454	0.2433	0.21342	0.19034	0.16932	0.15444	0.13986	0.12352
436.01	0.29814	0.2753	0.23716	0.20278	0.1806	0.16504	0.15156	0.13658	0.12564
434.012	0.28676	0.26556	0.22866	0.20116	0.18024	0.16068	0.14594	0.13558	0.12378
432.013	0.2774	0.24804	0.21986	0.20006	0.17426	0.15406	0.15086	0.13752	0.12634
430.014	0.2712	0.24986	0.21788	0.19148	0.17438	0.15556	0.14782	0.14154	0.1276
428.014	0.27158	0.24272	0.21658	0.18878	0.17112	0.1541	0.14662	0.13762	0.12948
426.013	0.26764	0.23856	0.21326	0.192	0.1681	0.15092	0.1413	0.13266	0.12944
424.012	0.26394	0.2446	0.21312	0.18812	0.1698	0.15284	0.14608	0.14024	0.12978
422.01	0.26542	0.23776	0.2096	0.18332	0.1686	0.15016	0.1461	0.13968	0.12692
420.007	0.25432	0.2317	0.20106	0.17846	0.16202	0.1472	0.1418	0.13836	0.12414
418.004	0.24644	0.22898	0.19794	0.17344	0.16122	0.14312	0.13786	0.13262	0.12684
415.999	0.23822	0.22228	0.19892	0.17358	0.15638	0.14364	0.13492	0.13308	0.12854
413.995	0.22652	0.20898	0.18544	0.16892	0.15302	0.13978	0.13368	0.1316	0.12984
411.989	0.21746	0.20426	0.18446	0.1635	0.15112	0.1404	0.1388	0.1321	0.12928
409.983	0.20668	0.1989	0.17618	0.16112	0.14556	0.13624	0.13708	0.13084	0.13292
408.015	0.19152	0.18612	0.16974	0.15208	0.1452	0.13584	0.13322	0.13396	0.13606
406.007	0.1904	0.18018	0.17024	0.15706	0.14632	0.1399	0.13954	0.14102	0.13916
403.999	0.17754	0.17838	0.1573	0.15022	0.14704	0.1351	0.13518	0.13288	0.1401
401.991	0.1759	0.17108	0.1659	0.15328	0.13838	0.1348	0.13884	0.14254	0.14394
399.981	0.17412	0.16864	0.16698	0.15748	0.15086	0.14786	0.14972	0.15304	0.15788
398.01	0.17188	0.17186	0.16734	0.16518	0.1528	0.1524	0.15352	0.16186	0.16646
395.999	0.17	0.1712	0.17082	0.1656	0.16206	0.1567	0.16184	0.16244	0.17064
393.988	0.17112	0.179	0.18234	0.1768	0.1701	0.16438	0.16312	0.17108	0.17578
392.014	0.1761	0.18656	0.19348	0.18964	0.18796	0.1824	0.18958	0.18824	0.18966
390.002	0.1833	0.19414	0.1964	0.19884	0.18782	0.1903	0.19446	0.19414	0.196
387.988	0.20642	0.20854	0.2162	0.21412	0.21004	0.2085	0.2127	0.20872	0.20676
386.013	0.21882	0.22736	0.23252	0.22286	0.22038	0.21616	0.22088	0.21544	0.2104
383.999	0.24664	0.25612	0.25026	0.24416	0.23604	0.2294	0.22912	0.22856	0.22118
381.983	0.27258	0.27504	0.26428	0.24998	0.24318	0.2333	0.23358	0.22406	0.21354
380.006	0.29042	0.2884	0.26976	0.25576	0.2431	0.23278	0.22614	0.22682	0.21484
377.99	0.30738	0.30412	0.27598	0.25782	0.23862	0.22626	0.2223	0.21612	0.20986
376.012	0.30842	0.30382	0.2702	0.25474	0.23668	0.219	0.21774	0.21394	0.203
373.994	0.31338	0.30216	0.27326	0.2519	0.2329	0.21796	0.2056	0.20666	0.19576
372.015	0.30086	0.28952	0.26718	0.24236	0.2239	0.20696	0.2004	0.19744	0.18522
369.996	0.29166	0.28098	0.2564	0.23232	0.2178	0.19954	0.19468	0.18278	0.17406
368.015	0.28384	0.27194	0.25134	0.22564	0.2092	0.20004	0.1863	0.18486	0.17108
365.995	0.27094	0.25982	0.23308	0.20874	0.19992	0.1846	0.17374	0.16804	0.15962
364.014	0.26704	0.25346	0.22786	0.20776	0.19378	0.17588	0.16764	0.1593	0.14606
361.992	0.26162	0.24666	0.22	0.199	0.17848	0.166	0.15082	0.14546	0.13478
360.01	0.26	0.24466	0.21552	0.1864	0.1746	0.15506	0.14438	0.13432	0.1287
357.987	0.26358	0.24336	0.21578	0.19074	0.16768	0.15474	0.14396	0.13402	0.12378
356.003	0.25128	0.23652	0.20108	0.1796	0.1563	0.14188	0.1308	0.12144	0.10948
354.019	0.24992	0.22492	0.20108	0.17798	0.15468	0.14396	0.12908	0.1176	0.10436
351.995	0.23802	0.22364	0.19736	0.1728	0.15554	0.14126	0.12468	0.11792	0.10364
350.009	0.23058	0.22188	0.19184	0.17384	0.15006	0.13946	0.1301	0.12324	0.10404
347.984	0.23048	0.21166	0.19666	0.17142	0.1583	0.13834	0.13418	0.12572	0.10522
345.997	0.21248	0.21018	0.18712	0.17224	0.15816	0.14718	0.13546	0.12778	0.11304
344.009	0.21458	0.21194	0.19146	0.17454	0.16202	0.14644	0.14184	0.12924	0.1158
341.983	0.21424	0.21144	0.19912	0.18796	0.1788	0.1693	0.15994	0.15792	0.13614
339.994	0.21678	0.22336	0.21308	0.20174	0.19256	0.18832	0.17736	0.17674	0.14958
338.005	0.21998	0.23196	0.21858	0.21458	0.20414	0.20334	0.19058	0.18976	0.1694
336.016	0.22234	0.23078	0.23658	0.22842	0.226	0.22142	0.2171	0.20904	0.1842
333.987	0.23816	0.2377	0.25962	0.25194	0.24632	0.24312	0.24636	0.23512	0.21282
331.996	0.23732	0.25274	0.2594	0.26576	0.26824	0.25852	0.26162	0.25062	0.23
330.005	0.25338	0.26606	0.27562	0.28262	0.28884	0.28274	0.28348	0.27796	0.2586
328.013	0.26356	0.27876	0.28976	0.30196	0.31164	0.30308	0.3047	0.30188	0.28384
325.982	0.26434	0.28182	0.30956	0.31962	0.32596	0.32356	0.32882	0.32618	0.30768
323.99	0.27892	0.29934	0.3241	0.33534	0.3407	0.34886	0.35236	0.34944	0.3425
321.996	0.28868	0.3129	0.33656	0.3491	0.35776	0.36166	0.37208	0.37788	0.37198
320.003	0.31804	0.33284	0.35892	0.37216	0.37988	0.386	0.40208	0.40942	0.40608
318.009	0.32892	0.34352	0.3741	0.38918	0.39182	0.40004	0.422	0.42476	0.4343
316.014	0.35464	0.38012	0.40118	0.41064	0.42114	0.42672	0.44894	0.45958	0.48228
314.019	0.38116	0.38216	0.41618	0.42538	0.436	0.44506	0.46784	0.4794	0.50366
311.984	0.39062	0.42332	0.4449	0.45216	0.464	0.47306	0.49828	0.51968	0.54676
309.988	0.4373	0.4431	0.46978	0.47606	0.49884	0.50026	0.52484	0.54686	0.5861
307.991	0.46374	0.48736	0.49744	0.52074	0.53146	0.53246	0.56926	0.58286	0.62722
305.994	0.5223	0.54186	0.5699	0.58492	0.58978	0.58986	0.62364	0.64834	0.68504
303.996	0.61018	0.61278	0.63188	0.6386	0.66426	0.66502	0.70392	0.7279	0.77062
301.998	0.7078	0.73922	0.75536	0.76614	0.76374	0.7833	0.79934	0.82918	0.88064
300	0.87472	0.87526	0.88092	0.91364	0.91544	0.92968	0.95214	0.99772	1.03358
298.001	1.14484	1.13896	1.1472	1.13106	1.14548	1.15136	1.18936	1.22032	1.2882
296.001	1.45416	1.45688	1.47876	1.45658	1.44428	1.49132	1.51496	1.55824	1.55658
294.001	1.94498	1.98752	2.00618	1.99158	1.97428	1.97384	1.99224	2.02466	2.0407
292.001	2.79772	2.78464	2.75224	2.78796	2.76984	2.83972	2.8083	2.8557	2.85654
290	3.20612	3.1392	3.16098	3.18088	3.19376	3.15844	3.21488	3.17444	3.21322
287.999	3.42352	3.45304	3.41916	3.44524	3.44856	3.42486	3.37214	3.39884	3.4515
285.997	3.9335	3.94526	3.87012	3.84282	3.83416	3.80796	3.77388	3.985	3.87972
283.995	4.30508	4.2478	4.28576	4.3043	4.3199	4.33132	4.20536	4.27738	4.24694
281.992	4.54682	4.59584	4.49818	4.53	4.47212	4.5149	4.57252	4.53418	4.41058
279.989	4.77736	4.592	4.75166	4.76092	4.73292	4.64866	4.68674	4.71026	4.43318
277.985	4.6954	4.79482	4.88298	4.764	4.76058	5.15322	4.61766	4.76968	4.69804
275.981	4.89536	4.86556	4.92758	4.87874	4.81374	4.9965	4.70058	5.0015	4.84238
274.016	4.94618	4.8566	4.98326	5.11832	5.05692	5.16388	4.84588	4.93236	4.82846
272.011	4.9126	4.91764	4.89972	4.80406	4.84924	4.91372	4.84254	4.7042	4.58336
270.006	4.96932	5.2285	4.80614	4.85286	4.6237	4.70902	4.80954	4.63394	4.63648
268	4.57454	4.7388	4.59754	4.77906	4.60448	4.57428	4.7344	4.60536	4.56238
265.994	4.43486	4.37468	4.39586	4.40042	4.43794	4.42142	4.3696	4.48284	4.4775
263.988	4.1446	4.19258	4.11346	4.25514	4.16972	4.24818	4.29626	4.37302	4.32408
261.981	3.8626	3.90042	3.91618	3.95346	3.9443	3.97866	4.02276	4.02888	4.041
260.013	3.64624	3.6952	3.70894	3.73652	3.75336	3.73974	3.8173	3.81914	3.89222
258.005	3.39758	3.4048	3.45302	3.42826	3.49298	3.5416	3.55106	3.58942	3.64588
255.997	3.1275	3.14282	3.1904	3.19942	3.21538	3.25724	3.26596	3.27366	3.3502
253.988	2.92582	2.952	2.9767	2.99008	2.99656	3.01182	3.06508	3.08502	3.14256
252.019	2.82868	2.84728	2.86204	2.8794	2.87804	2.9067	2.92424	2.9515	3.00996
250.009	2.74798	2.74916	2.77236	2.79834	2.78886	2.80464	2.83846	2.8618	2.91126
248	2.79038	2.78588	2.79446	2.80784	2.80702	2.82924	2.86156	2.86622	2.89416
245.99	2.8809	2.88054	2.92108	2.9367	2.9567	2.9417	2.9738	2.96662	3.0177
244.018	3.28852	3.32764	3.23078	3.3051	3.38904	3.2743	3.34018	3.33486	3.3346
242.008	3.89788	3.77222	3.76258	3.75376	3.85212	3.84652	3.8199	3.90694	3.73334
239.996	4.48114	4.53576	4.60508	4.86468	4.49872	4.15422	4.11346	4.28394	4.57216
237.985	5.46292	4.6267	4.99164	5.00606	4.3998	19.536	4.12	4.97464	4.31702
236.012	3.80868	4.15242	19.5425	19.5448	4.4963	3.91198	4.2305	5.10618	5.14806
234	3.91132	3.94612	3.15136	3.21924	3.11808	3.3357	3.93912	3.46678	4.52804
231.987	3.01574	2.77266	2.92296	3.5319	2.60518	2.91778	3.25406	4.18416	3.5457
230.013	3.33314	3.30096	19.5425	19.5448	3.24796	2.63992	2.70146	3.85064	19.5163
228	1.66592	2.28772	19.5425	3.14562	19.5308	1.78084	1.58444	1.29556	2.33498
225.986	0.9638	0.30868	19.5425	0.2996	19.5308	0.89208	0.91956	0.27564	0.81462
224.011	2.03714	1.93866	1.1143	2.0038	1.08952	2.0058	1.42286	1.32536	2.03908
221.997	0.71542	0.76356	0.53592	1.34316	0.72706	0.35768	0.79668	1.33538	0.82556
219.982	0.53266	0.38788	1.11238	19.5448	1.15312	1.12058	1.11882	0.11872	1.13702
218.006	0.7848	0.13514	0.19166	0.76716	0.8022	-0.21862	0.14036	0.15802	0.78702
215.99	0.01048	-0.3797	0.28902	0.93996	0.37076	0.2807	-0.0457	-0.55324	-0.96882
214.014	0.25178	0.35464	0.12504	0.1125	0.26986	0.47888	0.1198	-0.0671	-0.11744
211.998	-0.34532	0.59436	-0.02474	-0.0977	-0.42684	-0.49368	-0.39018	-0.02554	0.40534
209.981	0.78342	-0.24376	19.5425	0.71488	0.77894	19.536	19.5373	0.80374	0.6556
208.004	19.5247	-0.0621	-0.57978	-0.462	-0.92426	0.12786	0.0847	0.07908	-0.64832
205.987	-0.04272	0.90452	0.3463	-0.054	0.28454	19.536	-0.00442	0.38116	-0.14634
204.009	-0.38012	0.54932	0.0117	-0.12114	19.5308	-0.60904	0.60398	19.5184	-0.44894
201.991	19.5247	0.8893	0.02982	0.28354	0.85012	-0.20018	0.1864	0.46354	0.1795
200.012	-0.4471	0.11424	0.05796	-0.5729	-1.08086	-0.46246	-0.78706	-0.85952	-0.82442

## Sheet: Fig1e
WT 450			WT 600			WDF 450			WDF 600
0	0.993647		0	0.0740882		0	0.996542		0	0.0538983
42	0.896176		42	0.141235		114	0.926712		114	0.101288
102	0.785029		102	0.236765		258	0.839525		258	0.146102
162	0.681824		162	0.280676		402	0.765153		402	0.181525
222	0.592529		222	0.294147		462	0.722576		462	0.187797
282	0.540206		282	0.302294		632	0.675932		632	0.205288
342	0.522794		342	0.306206		802	0.633085		802	0.218271
402	0.465853		402	0.315529
462	0.462471		462	0.317735
522	0.463		522	0.298559
582	0.434147		582	0.290618
642	0.420353		642	0.286176
702	0.416676		702	0.279412
762	0.413853		762	0.262765
822	0.394324		822	0.258471

## Sheet: Fig1f
WT 435-455			WT 580-600			WDF 435-455			WDF 580-600
0	0.229251		0	0.344536		0	0.271678		0	0.309459
0.5	0.238116		0.5	0.341162		0.5	0.276965		0.5	0.307838
1	0.244597		1	0.334665		1	0.281899		1	0.303178
1.5	0.250079		1.5	0.329371		1.5	0.286263		1.5	0.299048
2	0.255013		2	0.32441		2	0.290052		2	0.295979
2.5	0.259445		2.5	0.320107		2.5	0.293455		2.5	0.292204
3	0.263508		3	0.316151		3	0.296649		3	0.288942
3.5	0.26691		3.5	0.31217		3.5	0.2997		3.5	0.286447
4	0.269784		4	0.307987		4	0.302284		4	0.283602
4.5	0.272936		4.5	0.304551		4.5	0.304817		4.5	0.281054
5	0.275873		5	0.301503		5	0.307109		5	0.278724
5.5	0.278621		5.5	0.298859		5.5	0.309266		5.5	0.276474
6	0.281459		6	0.2958		6	0.311178		6	0.274537
6.5	0.283984		6.5	0.29281		6.5	0.312865		6.5	0.272306
7	0.286515		7	0.290147		7	0.314292		7	0.270231
7.5	0.289264		7.5	0.287581		7.5	0.316034		7.5	0.268238
8	0.291493		8	0.284983		8	0.317502		8	0.266221
8.5	0.294011		8.5	0.282591		8.5	0.318802		8.5	0.264738
9	0.296361		9	0.280192		9	0.320241		9	0.263309
9.5	0.298466		9.5	0.27746		9.5	0.321389		9.5	0.261995
10	0.300604		10	0.274646		10	0.3226		10	0.260289
10.5	0.302527		10.5	0.272312		10.5	0.323635		10.5	0.259008
11	0.30479		11	0.269482		11	0.324842		11	0.257455
11.5	0.307013		11.5	0.267386		11.5	0.325639		11.5	0.255955
12	0.309136		12	0.26478		12	0.326938		12	0.2549
12.5	0.31116		12.5	0.262076		12.5	0.328036		12.5	0.254112
13	0.312913		13	0.260058		13	0.328951		13	0.253169
13.5	0.314906		13.5	0.257941		13.5	0.329578		13.5	0.251954
14	0.316889		14	0.25604		14	0.330554		14	0.251006
14.5	0.318358		14.5	0.254292		14.5	0.331093		14.5	0.249702
15	0.319774		15	0.253072		15	0.33214		15	0.249213
15.5	0.320874		15.5	0.252214		15.5	0.333042		15.5	0.248892
16	0.321589		16	0.251964		16	0.33371		16	0.247704
16.5	0.322185		16.5	0.250858		16.5	0.334295		16.5	0.247194
17	0.323943		17	0.249064		17	0.334744		17	0.245956
17.5	0.32756		17.5	0.244865		17.5	0.334494		17.5	0.244324
18	0.330621		18	0.241449		18	0.335067		18	0.243666
18.5	0.331895		18.5	0.240582		18.5	0.335472		18.5	0.243216
19	0.332027		19	0.240934		19	0.336023		19	0.242314
19.5	0.332409		19.5	0.240868		19.5	0.336631		19.5	0.241916
20	0.333064		20	0.240576		20	0.336868		20	0.241465
20.5	0.333668		20.5	0.239664		20.5	0.337332		20.5	0.240653
21	0.334092		21	0.239405		21	0.337572		21	0.240239
21.5	0.333388		21.5	0.239179		21.5	0.338012		21.5	0.239564
22	0.33229		22	0.239846		22	0.337942		22	0.238974
22.5	0.331728		22.5	0.240715		22.5	0.338316		22.5	0.238535
23	0.332136		23	0.241359		23	0.338193		23	0.237427
23.5	0.332365		23.5	0.240982		23.5	0.338158		23.5	0.237045
24	0.332562		24	0.239756		24	0.338209		24	0.236294
24.5	0.333529		24.5	0.239216		24.5	0.338405		24.5	0.235609
25	0.334021		25	0.238166		25	0.338214		25	0.235395
25.5	0.334485		25.5	0.237482		25.5	0.338634		25.5	0.234719
26	0.335336		26	0.236862		26	0.338427		26	0.234372
26.5	0.335852		26.5	0.235952		26.5	0.339353		26.5	0.234193
27	0.336727		27	0.234496		27	0.339347		27	0.233696
27.5	0.337292		27.5	0.233518		27.5	0.339704		27.5	0.233451
28	0.337514		28	0.23303		28	0.340351		28	0.233582
28.5	0.337961		28.5	0.232157		28.5	0.340668		28.5	0.233442
29	0.339114		29	0.230847		29	0.340954		29	0.232755
29.5	0.339867		29.5	0.22982		29.5	0.341178		29.5	0.232286
30	0.341481		30	0.229566		30	0.341233		30	0.231637
30.5	0.342772		30.5	0.228393		30.5	0.341703		30.5	0.231733
31	0.344029		31	0.227264		31	0.341743		31	0.23109
31.5	0.345305		31.5	0.226612		31.5	0.34223		31.5	0.230952
32	0.346069		32	0.22627		32	0.342363		32	0.230401
32.5	0.346847		32.5	0.225822		32.5	0.342768		32.5	0.230435
33	0.347333		33	0.225614		33	0.343234		33	0.229896
33.5	0.347729		33.5	0.225348		33.5	0.343682		33.5	0.22951
34	0.348192		34	0.224513		34	0.344494		34	0.230236
34.5	0.348455		34.5	0.223816		34.5	0.34467		34.5	0.229469
35	0.349029		35	0.223764		35	0.34482		35	0.229488
35.5	0.349347		35.5	0.223535		35.5	0.34446		35.5	0.228468
36	0.349558		36	0.223454		36	0.344435		36	0.227788
36.5	0.350063		36.5	0.22372		36.5	0.345289		36.5	0.228317
37	0.350271		37	0.224013		37	0.345756		37	0.22821
37.5	0.350257		37.5	0.223595		37.5	0.34629		37.5	0.228256
38	0.350053		38	0.22348		38	0.346633		38	0.227914
38.5	0.350036		38.5	0.223287		38.5	0.346239		38.5	0.227196
39	0.35013		39	0.22351		39	0.346811		39	0.226882
39.5	0.350431		39.5	0.223664		39.5	0.347307		39.5	0.227051
40	0.3504		40	0.223672		40	0.347288		40	0.226665
40.5	0.350277		40.5	0.223274		40.5	0.347148		40.5	0.225786
41	0.350129		41	0.222776		41	0.347466		41	0.226066
41.5	0.350133		41.5	0.222797		41.5	0.34792		41.5	0.226218
42	0.350481		42	0.22247		42	0.348466		42	0.225844
42.5	0.350472		42.5	0.222365		42.5	0.348917		42.5	0.226359
43	0.350691		43	0.222014		43	0.348925		43	0.225886
43.5	0.351115		43.5	0.22183		43.5	0.348727		43.5	0.225601
44	0.351268		44	0.221952		44	0.348765		44	0.225546
44.5	0.351836		44.5	0.22162		44.5	0.348775		44.5	0.225444
45	0.352402		45	0.221509		45	0.349217		45	0.225544
45.5	0.353064		45.5	0.221688		45.5	0.348966		45.5	0.225176
46	0.353496		46	0.221672		46	0.349242		46	0.224778
46.5	0.354131		46.5	0.221621		46.5	0.350256		46.5	0.225585
47	0.354605		47	0.22196		47	0.350534		47	0.225377
47.5	0.354931		47.5	0.221812		47.5	0.350227		47.5	0.224736
48	0.355073		48	0.221481		48	0.349817		48	0.224302
48.5	0.355226		48.5	0.22116		48.5	0.350278		48.5	0.224896
49	0.355937		49	0.221368		49	0.350905		49	0.224832
49.5	0.356282		49.5	0.221369		49.5	0.35105		49.5	0.224688
50	0.356725		50	0.221296		50	0.35073		50	0.224023
