# Supplementary material for: Magnetic sensitivity of cryptochrome 4 from a migratory songbird
Source: Springer Nature journal article supplement (doi:10.1038/s41586-021-03618-9), 2021-06-23
Supplement: MOESM4 [file 41586_2021_3618_MOESM4_ESM.xlsx]

## Sheet: Fig2ab
ErCry4 WT pH7			ErCry4 WT pH8			ErCry4 WDF pH7			AtCry1 WT pH7
0	0		0	0		0	0		0	0
3.006	-0.00435		3.75	-0.0333333		0.9018	-0.00693		3.73	-0.00394
6.012	-0.0075		7.5	-0.057037		3.006	-0.05679		7.46	-0.01767
9.018	-0.0108		11.25	-0.0607407		6.012	-0.11412		11.19	-0.02358
12.024	-0.01694		15	-0.0733333		9.018	-0.14671		14.92	-0.02885
15.03	-0.01699		18.75	-0.077037		12.024	-0.16296		18.65	-0.04101
19.539	-0.01528		22.5	-0.0740741		15.03	-0.17114		22.38	-0.04005
24.7995	-0.0113		26.25	-0.0851852		19.539	-0.17085		26.11	-0.04687
30.06	-0.01378		30	-0.0755556		24.7995	-0.18015		29.84	-0.05233
						30.06	-0.17565

## Sheet: Fig2c
ErCry4 10.4 s			ErCry4 0.78 s			GgCry4			ClCry4
500.467	-3.86026		500.467	-6.97271		500.467	-1.03785		500.467	-0.681978
501.024	-3.7205		501.024	-7.13579		501.024	-0.939643		501.024	-0.626947
501.581	-3.20011		501.581	-7.47323		501.581	-1.05074		501.581	-0.556926
502.138	-3.39243		502.138	-7.79013		502.138	-1.08831		502.138	-0.404101
502.695	-3.03214		502.695	-8.10141		502.695	-1.07731		502.695	-0.318502
503.252	-3.45768		503.252	-7.91538		503.252	-0.96934		503.252	-0.320378
503.81	-3.69691		503.81	-8.19403		503.81	-0.81122		503.81	-0.331646
504.367	-3.8175		504.367	-8.23741		504.367	-0.698601		504.367	-0.390699
504.924	-3.79053		504.924	-8.16092		504.924	-0.580873		504.924	-0.426717
505.481	-3.81336		505.481	-8.1544		505.481	-0.62911		505.481	-0.458196
506.038	-3.713		506.038	-8.21419		506.038	-0.647446		506.038	-0.526351
506.595	-3.61046		506.595	-8.36944		506.595	-0.671891		506.595	-0.571931
507.152	-3.52004		507.152	-8.47198		507.152	-0.726735		507.152	-0.517347
507.709	-3.82846		507.709	-8.46996		507.709	-0.73254		507.709	-0.482018
508.266	-3.77404		508.266	-8.58555		508.266	-0.670999		508.266	-0.448236
508.823	-3.95552		508.823	-8.55643		508.823	-0.731152		508.823	-0.457527
509.38	-3.37516		509.38	-8.56011		509.38	-0.811068		509.38	-0.463671
509.937	-3.44412		509.937	-8.56713		509.937	-0.884507		509.937	-0.495058
510.493	-3.44902		510.493	-8.70951		510.493	-0.816122		510.493	-0.47607
511.05	-3.5487		511.05	-8.64817		511.05	-0.823259		511.05	-0.497452
511.607	-3.00091		511.607	-8.72062		511.607	-0.795592		511.607	-0.504335
512.164	-2.98545		512.164	-8.78028		512.164	-0.922148		512.164	-0.527618
512.721	-2.84039		512.721	-8.98136		512.721	-1.00256		512.721	-0.531283
513.278	-3.2716		513.278	-8.82077		513.278	-1.03418		513.278	-0.565089
513.835	-3.58538		513.835	-8.85724		513.835	-0.818579		513.835	-0.54184
514.391	-3.21724		514.391	-8.77169		514.391	-0.773174		514.391	-0.495933
514.948	-2.91009		514.948	-8.98449		514.948	-0.704791		514.948	-0.450633
515.505	-3.03063		515.505	-9.06996		515.505	-0.778335		515.505	-0.43189
516.062	-3.23805		516.062	-9.19626		516.062	-0.861201		516.062	-0.435681
516.619	-3.30735		516.619	-9.19372		516.619	-0.850611		516.619	-0.473222
517.175	-3.70798		517.175	-9.34753		517.175	-0.757214		517.175	-0.491715
517.732	-3.57453		517.732	-9.43906		517.732	-0.766275		517.732	-0.496459
518.289	-4.17834		518.289	-9.39294		518.289	-0.764901		518.289	-0.488415
518.845	-4.16306		518.845	-9.44408		518.845	-0.793043		518.845	-0.513223
519.402	-4.44806		519.402	-9.53756		519.402	-0.815894		519.402	-0.570939
519.959	-4.08508		519.959	-9.57223		519.959	-0.833751		519.959	-0.594198
520.516	-3.98557		520.516	-9.55227		520.516	-0.827523		520.516	-0.599969
521.072	-3.90252		521.072	-9.40255		521.072	-0.790671		521.072	-0.604043
521.629	-3.9668		521.629	-9.39158		521.629	-0.777577		521.629	-0.572978
522.185	-3.95353		522.185	-9.34117		522.185	-0.694325		522.185	-0.554456
522.742	-3.79808		522.742	-9.47225		522.742	-0.746786		522.742	-0.57123
523.299	-3.52816		523.299	-9.38577		523.299	-0.826756		523.299	-0.557284
523.855	-3.71737		523.855	-9.35932		523.855	-0.90201		523.855	-0.553011
524.412	-3.69441		524.412	-9.4558		524.412	-0.976001		524.412	-0.569706
524.968	-4.01119		524.968	-9.46367		524.968	-1.01704		524.968	-0.572094
525.525	-3.99742		525.525	-9.51978		525.525	-0.939599		525.525	-0.557753
526.081	-4.01728		526.081	-9.54725		526.081	-0.965432		526.081	-0.536203
526.638	-4.00628		526.638	-9.49086		526.638	-0.903547		526.638	-0.525341
527.195	-4.10909		527.195	-9.45934		527.195	-0.855471		527.195	-0.518522
527.751	-4.22128		527.751	-9.36475		527.751	-0.817817		527.751	-0.532867
528.307	-4.03733		528.307	-9.34894		528.307	-0.762742		528.307	-0.541863
528.864	-3.94522		528.864	-9.36612		528.864	-0.759881		528.864	-0.531799
529.42	-3.91827		529.42	-9.32503		529.42	-0.865379		529.42	-0.533183
529.977	-3.94832		529.977	-9.33649		529.977	-0.936547		529.977	-0.545346
530.533	-4.04561		530.533	-9.54104		530.533	-0.962078		530.533	-0.535394
531.09	-4.06589		531.09	-9.4054		531.09	-0.975877		531.09	-0.526857
531.646	-3.91035		531.646	-9.40458		531.646	-0.934648		531.646	-0.526172
532.203	-3.93095		532.203	-9.47974		532.203	-0.919305		532.203	-0.491055
532.759	-3.96248		532.759	-9.32777		532.759	-0.932652		532.759	-0.492369
533.315	-4.09979		533.315	-9.24328		533.315	-0.937267		533.315	-0.489429
533.872	-3.89006		533.872	-9.07906		533.872	-0.895712		533.872	-0.494107
534.428	-3.94391		534.428	-9.11844		534.428	-0.854085		534.428	-0.492012
534.984	-3.73754		534.984	-9.01734		534.984	-0.800485		534.984	-0.505395
535.541	-3.85283		535.541	-9.08969		535.541	-0.787342		535.541	-0.522493
536.097	-3.82776		536.097	-9.00656		536.097	-0.817888		536.097	-0.567507
536.653	-3.81755		536.653	-8.85929		536.653	-0.891612		536.653	-0.583446
537.21	-3.76492		537.21	-8.87421		537.21	-0.900992		537.21	-0.58714
537.766	-3.83586		537.766	-8.75976		537.766	-0.84612		537.766	-0.536334
538.322	-3.69438		538.322	-8.61291		538.322	-0.814544		538.322	-0.497072
538.878	-3.71783		538.878	-8.64875		538.878	-0.843281		538.878	-0.482959
539.435	-3.55334		539.435	-8.48541		539.435	-0.861514		539.435	-0.497667
539.991	-3.42142		539.991	-8.32572		539.991	-0.833118		539.991	-0.479626
540.547	-3.62406		540.547	-8.46174		540.547	-0.840813		540.547	-0.474525
541.103	-3.65345		541.103	-8.32612		541.103	-0.82492		541.103	-0.443821
541.66	-3.85779		541.66	-8.35843		541.66	-0.794851		541.66	-0.437346
542.216	-3.84722		542.216	-8.22338		542.216	-0.782643		542.216	-0.433123
542.772	-3.73759		542.772	-8.14596		542.772	-0.745673		542.772	-0.418473
543.328	-3.75223		543.328	-8.12959		543.328	-0.682617		543.328	-0.370055
543.884	-3.65142		543.884	-8.09384		543.884	-0.691419		543.884	-0.36571
544.44	-3.45341		544.44	-7.93129		544.44	-0.719768		544.44	-0.378617
544.997	-3.37705		544.997	-7.732		544.997	-0.709904		544.997	-0.39499
545.553	-3.31418		545.553	-7.66866		545.553	-0.692803		545.553	-0.39842
546.109	-3.1225		546.109	-7.66081		546.109	-0.697017		546.109	-0.407849
546.665	-2.81084		546.665	-7.64811		546.665	-0.721494		546.665	-0.398246
547.221	-2.82355		547.221	-7.42339		547.221	-0.73147		547.221	-0.416909
547.777	-2.75912		547.777	-7.38929		547.777	-0.730641		547.777	-0.434285
548.333	-2.80757		548.333	-7.28129		548.333	-0.771104		548.333	-0.419132
548.889	-2.8351		548.889	-7.23945		548.889	-0.748495		548.889	-0.378078
549.445	-2.66002		549.445	-7.05328		549.445	-0.720648		549.445	-0.351722
550.001	-2.61204		550.001	-6.97544		550.001	-0.694264		550.001	-0.360158
550.557	-2.68699		550.557	-6.69815		550.557	-0.724537		550.557	-0.387542
551.113	-2.68994		551.113	-6.56373		551.113	-0.724992		551.113	-0.386245
551.669	-2.60976		551.669	-6.18199		551.669	-0.779991		551.669	-0.382379
552.225	-2.46117		552.225	-6.04946		552.225	-0.750401		552.225	-0.358091
552.781	-2.48499		552.781	-6.03026		552.781	-0.700544		552.781	-0.308643
553.337	-2.50168		553.337	-5.7586		553.337	-0.684346		553.337	-0.308048
553.893	-2.32544		553.893	-5.63492		553.893	-0.686093		553.893	-0.311668
554.449	-2.30178		554.449	-5.51138		554.449	-0.628739		554.449	-0.324505
555.005	-2.42289		555.005	-5.44305		555.005	-0.626356		555.005	-0.350913
555.561	-2.4808		555.561	-5.46257		555.561	-0.587937		555.561	-0.355974
556.117	-2.37465		556.117	-5.2567		556.117	-0.545971		556.117	-0.333874
556.673	-2.25714		556.673	-5.08148		556.673	-0.540053		556.673	-0.318663
557.229	-2.16439		557.229	-5.02229		557.229	-0.488954		557.229	-0.314058
557.785	-2.17818		557.785	-4.90952		557.785	-0.45282		557.785	-0.318887
558.341	-2.12038		558.341	-4.80678		558.341	-0.472286		558.341	-0.306503
558.896	-2.05256		558.896	-4.66142		558.896	-0.469701		558.896	-0.294239
559.452	-1.99537		559.452	-4.57772		559.452	-0.462406		559.452	-0.271443
560.008	-1.95972		560.008	-4.54957		560.008	-0.474575		560.008	-0.259851
560.564	-1.83007		560.564	-4.51225		560.564	-0.482962		560.564	-0.252295
561.12	-1.70271		561.12	-4.36536		561.12	-0.512702		561.12	-0.250946
561.676	-1.52969		561.676	-4.14123		561.676	-0.527744		561.676	-0.237113
562.232	-1.53437		562.232	-4.04308		562.232	-0.531652		562.232	-0.238362
562.787	-1.4178		562.787	-3.88267		562.787	-0.5084		562.787	-0.236598
563.343	-1.23917		563.343	-3.80919		563.343	-0.510679		563.343	-0.242993
563.899	-1.21639		563.899	-3.60156		563.899	-0.471318		563.899	-0.236391
564.455	-1.03629		564.455	-3.45005		564.455	-0.453794		564.455	-0.227138
565.011	-1.078		565.011	-3.52617		565.011	-0.436236		565.011	-0.206469
565.566	-1.08929		565.566	-3.43863		565.566	-0.436003		565.566	-0.208844
566.122	-1.07142		566.122	-3.30845		566.122	-0.413628		566.122	-0.22206
566.678	-1.10713		566.678	-3.26814		566.678	-0.43242		566.678	-0.239403
567.234	-1.21509		567.234	-3.21999		567.234	-0.435971		567.234	-0.249491
567.789	-1.29622		567.789	-3.22518		567.789	-0.425313		567.789	-0.236894
568.345	-1.14181		568.345	-3.17453		568.345	-0.40811		568.345	-0.220182
568.901	-1.10903		568.901	-2.96027		568.901	-0.429068		568.901	-0.210213
569.456	-1.05292		569.456	-2.91388		569.456	-0.410125		569.456	-0.212936
570.012	-0.982693		570.012	-3.07365		570.012	-0.41989		570.012	-0.22575
570.568	-0.995515		570.568	-2.97294		570.568	-0.43328		570.568	-0.241767
571.123	-1.059		571.123	-2.76176		571.123	-0.419606		571.123	-0.233018
571.679	-1.02103		571.679	-2.68852		571.679	-0.429797		571.679	-0.243899
572.235	-0.979365		572.235	-2.68868		572.235	-0.450762		572.235	-0.2407
572.79	-0.938189		572.79	-2.49921		572.79	-0.45578		572.79	-0.245771
573.346	-0.874132		573.346	-2.44562		573.346	-0.426181		573.346	-0.263528
573.902	-0.964031		573.902	-2.33197		573.902	-0.393854		573.902	-0.263126
574.457	-0.925034		574.457	-2.3114		574.457	-0.358003		574.457	-0.238252
575.013	-0.832608		575.013	-2.28456		575.013	-0.363848		575.013	-0.246845
575.569	-0.811943		575.569	-2.17143		575.569	-0.310002		575.569	-0.243968
576.124	-0.658509		576.124	-2.11627		576.124	-0.307798		576.124	-0.25077
576.68	-0.794555		576.68	-2.10123		576.68	-0.277432		576.68	-0.276909
577.235	-0.900753		577.235	-1.99753		577.235	-0.289125		577.235	-0.27686
577.791	-0.862529		577.791	-1.93351		577.791	-0.279217		577.791	-0.260027
578.346	-0.934198		578.346	-1.83243		578.346	-0.335429		578.346	-0.242017
578.902	-0.944241		578.902	-1.78943		578.902	-0.303557		578.902	-0.228261
579.458	-1.01668		579.458	-1.74987		579.458	-0.331223		579.458	-0.221313
580.013	-1.10159		580.013	-1.73293		580.013	-0.338115		580.013	-0.22519
580.569	-1.10055		580.569	-1.7843		580.569	-0.35415		580.569	-0.215947
581.124	-1.01098		581.124	-1.74035		581.124	-0.344327		581.124	-0.197937
581.68	-1.0058		581.68	-1.62345		581.68	-0.34875		581.68	-0.191537
582.235	-1.00735		582.235	-1.68766		582.235	-0.315992		582.235	-0.221543
582.791	-0.936704		582.791	-1.63554		582.791	-0.327024		582.791	-0.235853
583.346	-0.900103		583.346	-1.67306		583.346	-0.307583		583.346	-0.243755
583.902	-0.758858		583.902	-1.68803		583.902	-0.314741		583.902	-0.234655
584.457	-0.734354		584.457	-1.64735		584.457	-0.301194		584.457	-0.20116
585.013	-0.746933		585.013	-1.61313		585.013	-0.299187		585.013	-0.190157
585.568	-0.504392		585.568	-1.5379		585.568	-0.289392		585.568	-0.172143
586.124	-0.442773		586.124	-1.55808		586.124	-0.319949		586.124	-0.162949
586.679	-0.409648		586.679	-1.60705		586.679	-0.309651		586.679	-0.155681
587.235	-0.64527		587.235	-1.47397		587.235	-0.321676		587.235	-0.159762
587.79	-0.532428		587.79	-1.48674		587.79	-0.328608		587.79	-0.188236
588.346	-0.617566		588.346	-1.42786		588.346	-0.325344		588.346	-0.217439
588.901	-0.67156		588.901	-1.45781		588.901	-0.337534		588.901	-0.233361
589.456	-0.583393		589.456	-1.44904		589.456	-0.360643		589.456	-0.263345
590.012	-0.697354		590.012	-1.42152		590.012	-0.362289		590.012	-0.254775
590.567	-0.678083		590.567	-1.40465		590.567	-0.378111		590.567	-0.22282
591.123	-0.625298		591.123	-1.48407		591.123	-0.340916		591.123	-0.207855
591.678	-0.507439		591.678	-1.41431		591.678	-0.318249		591.678	-0.222024
592.233	-0.513049		592.233	-1.44497		592.233	-0.324634		592.233	-0.226698
592.789	-0.486352		592.789	-1.35883		592.789	-0.31644		592.789	-0.227644
593.344	-0.494473		593.344	-1.42602		593.344	-0.325934		593.344	-0.207432
593.9	-0.538444		593.9	-1.40826		593.9	-0.345847		593.9	-0.16637
594.455	-0.509438		594.455	-1.34656		594.455	-0.303238		594.455	-0.149954
595.01	-0.489979		595.01	-1.34136		595.01	-0.306257		595.01	-0.174742
595.566	-0.528646		595.566	-1.33346		595.566	-0.281443		595.566	-0.171135
596.121	-0.531463		596.121	-1.41376		596.121	-0.252878		596.121	-0.172751
596.676	-0.542656		596.676	-1.34822		596.676	-0.235034		596.676	-0.147846
597.232	-0.604398		597.232	-1.34248		597.232	-0.251276		597.232	-0.169262
597.787	-0.520064		597.787	-1.3013		597.787	-0.274371		597.787	-0.190467
598.342	-0.567928		598.342	-1.31241		598.342	-0.317061		598.342	-0.191749
598.898	-0.609878		598.898	-1.42145		598.898	-0.332153		598.898	-0.191779
599.453	-0.55041		599.453	-1.34025		599.453	-0.330501		599.453	-0.186872
600.008	-0.487993		600.008	-1.25355		600.008	-0.328002		600.008	-0.179711
600.564	-0.382401		600.564	-1.39581		600.564	-0.304054		600.564	-0.216389
601.119	-0.414811		601.119	-1.3815		601.119	-0.28081		601.119	-0.227585
601.674	-0.440583		601.674	-1.30868		601.674	-0.277703		601.674	-0.204875
602.229	-0.334511		602.229	-1.26982		602.229	-0.256295		602.229	-0.192985
602.785	-0.357204		602.785	-1.34435		602.785	-0.253793		602.785	-0.180949
603.34	-0.401866		603.34	-1.38634		603.34	-0.282345		603.34	-0.163504
603.895	-0.46791		603.895	-1.40388		603.895	-0.324258		603.895	-0.14462
604.451	-0.414367		604.451	-1.36995		604.451	-0.36879		604.451	-0.138706
605.006	-0.384556		605.006	-1.421		605.006	-0.408857		605.006	-0.106
605.561	-0.481135		605.561	-1.4314		605.561	-0.406173		605.561	-0.118413
606.116	-0.484674		606.116	-1.45219		606.116	-0.403607		606.116	-0.135597
606.671	-0.430825		606.671	-1.42624		606.671	-0.408538		606.671	-0.153921
607.227	-0.426294		607.227	-1.4177		607.227	-0.404548		607.227	-0.168875
607.782	-0.5621		607.782	-1.32469		607.782	-0.406948		607.782	-0.184322
608.337	-0.569838		608.337	-1.33588		608.337	-0.405424		608.337	-0.152588
608.892	-0.452092		608.892	-1.37189		608.892	-0.366981		608.892	-0.138624
609.448	-0.438026		609.448	-1.38854		609.448	-0.383501		609.448	-0.126171
610.003	-0.49171		610.003	-1.29026		610.003	-0.384184		610.003	-0.112535
610.558	-0.359286		610.558	-1.3117		610.558	-0.362352		610.558	-0.109509
611.113	-0.326656		611.113	-1.29589		611.113	-0.336596		611.113	-0.144368
611.668	-0.409396		611.668	-1.28531		611.668	-0.310779		611.668	-0.147979
612.224	-0.439059		612.224	-1.25953		612.224	-0.259766		612.224	-0.165715
612.779	-0.596619		612.779	-1.27689		612.779	-0.255126		612.779	-0.180989
613.334	-0.574723		613.334	-1.26436		613.334	-0.243646		613.334	-0.159493
613.889	-0.546062		613.889	-1.30868		613.889	-0.293007		613.889	-0.149363
614.444	-0.566815		614.444	-1.30423		614.444	-0.318357		614.444	-0.149531
614.999	-0.568077		614.999	-1.20513		614.999	-0.374918		614.999	-0.13124
615.555	-0.489076		615.555	-1.20516		615.555	-0.406288		615.555	-0.163706
616.11	-0.436185		616.11	-1.25909		616.11	-0.41863		616.11	-0.156049
616.665	-0.260482		616.665	-1.26381		616.665	-0.378672		616.665	-0.161351
617.22	-0.373374		617.22	-1.24666		617.22	-0.377824		617.22	-0.164961
617.775	-0.464669		617.775	-1.3059		617.775	-0.357724		617.775	-0.130019
618.33	-0.381879		618.33	-1.31704		618.33	-0.325119		618.33	-0.100855
618.886	-0.404393		618.886	-1.39274		618.886	-0.284125		618.886	-0.107189
619.441	-0.519228		619.441	-1.42049		619.441	-0.270479		619.441	-0.113987
619.996	-0.515406		619.996	-1.38762		619.996	-0.251473		619.996	-0.150501
620.551	-0.389058		620.551	-1.36738		620.551	-0.279957		620.551	-0.174121
621.106	-0.437124		621.106	-1.25476		621.106	-0.294813		621.106	-0.164658
621.661	-0.567375		621.661	-1.17192		621.661	-0.255616		621.661	-0.169446
622.216	-0.640881		622.216	-1.18074		622.216	-0.225743		622.216	-0.159683
622.771	-0.565628		622.771	-1.17905		622.771	-0.239099		622.771	-0.171384
623.326	-0.539705		623.326	-1.1148		623.326	-0.252373		623.326	-0.188476
623.882	-0.421787		623.882	-1.09724		623.882	-0.237773		623.882	-0.202732
624.437	-0.253845		624.437	-1.05796		624.437	-0.261609		624.437	-0.214595
624.992	-0.555346		624.992	-1.17127		624.992	-0.278127		624.992	-0.232278
625.547	-0.395043		625.547	-1.20534		625.547	-0.310724		625.547	-0.217514
626.102	-0.424805		626.102	-1.15441		626.102	-0.360871		626.102	-0.187614
626.657	-0.288421		626.657	-1.18313		626.657	-0.345599		626.657	-0.165124
627.212	-0.261949		627.212	-1.23085		627.212	-0.293104		627.212	-0.148856
627.767	-0.421575		627.767	-1.2327		627.767	-0.270267		627.767	-0.1535
628.322	-0.474049		628.322	-1.22774		628.322	-0.219407		628.322	-0.175147
628.877	-0.461845		628.877	-1.1695		628.877	-0.205073		628.877	-0.195929
629.432	-0.442603		629.432	-1.19966		629.432	-0.218101		629.432	-0.211958
629.988	-0.384988		629.988	-1.16249		629.988	-0.217367		629.988	-0.239382
630.543	-0.383048		630.543	-1.10946		630.543	-0.239271		630.543	-0.218011
631.098	-0.38345		631.098	-1.04484		631.098	-0.247613		631.098	-0.1973
631.653	-0.310659		631.653	-1.08604		631.653	-0.224361		631.653	-0.190629
632.208	-0.313353		632.208	-1.07325		632.208	-0.248084		632.208	-0.19176
632.763	-0.38311		632.763	-0.984506		632.763	-0.244307		632.763	-0.177317
633.318	-0.348016		633.318	-1.03899		633.318	-0.228591		633.318	-0.172759
633.873	-0.284053		633.873	-0.997882		633.873	-0.210207		633.873	-0.150693
634.428	-0.316668		634.428	-0.969805		634.428	-0.211248		634.428	-0.161858
634.983	-0.363974		634.983	-1.104		634.983	-0.209859		634.983	-0.162748
635.538	-0.31288		635.538	-1.20236		635.538	-0.257567		635.538	-0.180375
636.093	-0.371539		636.093	-1.12635		636.093	-0.291007		636.093	-0.161426
636.648	-0.285458		636.648	-1.15226		636.648	-0.297998		636.648	-0.143484
637.203	-0.36158		637.203	-1.15945		637.203	-0.302274		637.203	-0.123419
637.758	-0.319226		637.758	-1.08121		637.758	-0.29465		637.758	-0.125152
638.313	-0.294211		638.313	-1.07319		638.313	-0.270469		638.313	-0.119727
638.868	-0.236474		638.868	-1.06874		638.868	-0.288212		638.868	-0.136361
639.423	-0.0765065		639.423	-0.965977		639.423	-0.324247		639.423	-0.152968
639.978	-0.136981		639.978	-0.942772		639.978	-0.322437		639.978	-0.1837
640.533	-0.0247844		640.533	-0.954718		640.533	-0.298814		640.533	-0.192478
641.088	-0.0252444		641.088	-0.971997		641.088	-0.265655		641.088	-0.171555
641.643	-0.0176928		641.643	-0.951777		641.643	-0.242461		641.643	-0.164577
642.198	0.00669861		642.198	-0.936788		642.198	-0.249591		642.198	-0.163391
642.753	0.0248607		642.753	-0.94555		642.753	-0.256683		642.753	-0.173208
643.308	0.0655466		643.308	-0.956493		643.308	-0.254481		643.308	-0.191089
643.863	0.0258095		643.863	-0.941433		643.863	-0.217749		643.863	-0.206265
644.418	-0.104476		644.418	-0.91052		644.418	-0.209065		644.418	-0.188962
644.973	-0.167102		644.973	-0.825323		644.973	-0.257824		644.973	-0.178142
645.528	-0.0699475		645.528	-0.838604		645.528	-0.299898		645.528	-0.190226
646.083	-0.114255		646.083	-0.865326		646.083	-0.322172		646.083	-0.198335
646.638	-0.149784		646.638	-0.81038		646.638	-0.36627		646.638	-0.212563
647.193	-0.118265		647.193	-0.796984		647.193	-0.365551		647.193	-0.199046
647.748	-0.153296		647.748	-0.829264		647.748	-0.359054		647.748	-0.175831
648.303	-0.141848		648.303	-0.833585		648.303	-0.339244		648.303	-0.162597
648.858	0.0411289		648.858	-0.85261		648.858	-0.30512		648.858	-0.177442
649.413	-0.00306313		649.413	-0.788097		649.413	-0.254668		649.413	-0.197727
649.968	0.0014055		649.968	-0.719908		649.968	-0.24728		649.968	-0.211635
650.523	-0.0356508		650.523	-0.809986		650.523	-0.238547		650.523	-0.203994
651.078	-0.0339322		651.078	-0.797523		651.078	-0.254664		651.078	-0.185268
651.633	-0.11466		651.633	-0.736639		651.633	-0.271314		651.633	-0.190229
652.188	-0.102012		652.188	-0.731966		652.188	-0.283898		652.188	-0.186541
652.743	-0.173697		652.743	-0.718259		652.743	-0.272116		652.743	-0.182218
653.298	-0.164913		653.298	-0.78955		653.298	-0.280887		653.298	-0.165966
653.853	-0.187291		653.853	-0.808999		653.853	-0.261239		653.853	-0.157688
654.408	-0.139118		654.408	-0.754671		654.408	-0.256375		654.408	-0.160177
654.963	-0.153456		654.963	-0.715464		654.963	-0.250695		654.963	-0.201997
655.518	-0.15689		655.518	-0.79767		655.518	-0.241217		655.518	-0.211147
656.073	-0.137887		656.073	-0.726496		656.073	-0.216531		656.073	-0.225799
656.628	-0.108233		656.628	-0.675172		656.628	-0.22429		656.628	-0.221572
657.183	-0.0328036		657.183	-0.61945		657.183	-0.196931		657.183	-0.219044
657.738	-0.102604		657.738	-0.708983		657.738	-0.193426		657.738	-0.206915
658.293	-0.123359		658.293	-0.769978		658.293	-0.180818		658.293	-0.198234
658.848	-0.0989474		658.848	-0.702984		658.848	-0.196325		658.848	-0.173535
659.403	0.0474638		659.403	-0.739578		659.403	-0.212811		659.403	-0.153656
659.958	0.0292905		659.958	-0.6765		659.958	-0.214065		659.958	-0.127205
660.513	0.00364831		660.513	-0.728186		660.513	-0.211265		660.513	-0.125842
661.068	-0.0307631		661.068	-0.735242		661.068	-0.202875		661.068	-0.116464
661.623	0.022832		661.623	-0.646929		661.623	-0.197297		661.623	-0.115917
662.178	0.0613259		662.178	-0.530513		662.178	-0.179215		662.178	-0.14476
662.733	0.112203		662.733	-0.581538		662.733	-0.173233		662.733	-0.145162
663.288	0.02821		663.288	-0.566396		663.288	-0.156187		663.288	-0.147362
663.843	-0.0375555		663.843	-0.528486		663.843	-0.145184		663.843	-0.157583
664.398	-0.0337985		664.398	-0.487145		664.398	-0.144106		664.398	-0.157378
664.953	-0.00354192		664.953	-0.500347		664.953	-0.150611		664.953	-0.153502
665.508	0.0861817		665.508	-0.511778		665.508	-0.158075		665.508	-0.163673
666.063	-0.0311037		666.063	-0.509477		666.063	-0.143487		666.063	-0.15716
666.618	-0.041485		666.618	-0.542253		666.618	-0.154847		666.618	-0.138046
667.173	0.0297387		667.173	-0.554545		667.173	-0.129554		667.173	-0.127777
667.728	0.057365		667.728	-0.590737		667.728	-0.132043		667.728	-0.128272
668.283	0.0835558		668.283	-0.610279		668.283	-0.139261		668.283	-0.130325
668.838	-0.0485756		668.838	-0.609881		668.838	-0.160107		668.838	-0.122916
669.393	-0.098062		669.393	-0.592948		669.393	-0.170258		669.393	-0.133199
669.948	-0.121194		669.948	-0.615454		669.948	-0.195429		669.948	-0.119281
670.503	-0.15683		670.503	-0.628704		670.503	-0.179715		670.503	-0.111168
671.058	-0.152097		671.058	-0.572216		671.058	-0.18405		671.058	-0.113487
671.613	-0.140878		671.613	-0.535056		671.613	-0.169403		671.613	-0.103568
672.168	-0.0849748		672.168	-0.615013		672.168	-0.144813		672.168	-0.0885992
672.723	-0.057606		672.723	-0.622916		672.723	-0.137157		672.723	-0.0846997
673.278	-0.0937906		673.278	-0.587652		673.278	-0.11805		673.278	-0.06933
673.833	-0.0733907		673.833	-0.626837		673.833	-0.122743		673.833	-0.0911712
674.388	-0.0277589		674.388	-0.674627		674.388	-0.145614		674.388	-0.0920368
674.943	-0.0335684		674.943	-0.62458		674.943	-0.160028		674.943	-0.101848
675.498	0.040217		675.498	-0.616814		675.498	-0.177349		675.498	-0.118169
676.053	-0.0397011		676.053	-0.655376		676.053	-0.2084		676.053	-0.136227
676.608	0.0724539		676.608	-0.617331		676.608	-0.191937		676.608	-0.140538
677.163	-0.00562394		677.163	-0.709143		677.163	-0.193959		677.163	-0.164853
677.718	-0.00618318		677.718	-0.670788		677.718	-0.190028		677.718	-0.14803
678.273	-0.0623378		678.273	-0.616709		678.273	-0.181709		678.273	-0.128881
678.828	-0.0760467		678.828	-0.646866		678.828	-0.164487		678.828	-0.0886259
679.383	-0.0238964		679.383	-0.638761		679.383	-0.169667		679.383	-0.0725021
679.938	0.023333		679.938	-0.658609		679.938	-0.147381		679.938	-0.0511582
680.493	0.0318598		680.493	-0.68361		680.493	-0.145289		680.493	-0.0427802
681.048	-0.00652595		681.048	-0.631205		681.048	-0.159988		681.048	-0.0571751
681.603	-0.0304791		681.603	-0.611346		681.603	-0.156833		681.603	-0.0785857
682.158	-0.0239033		682.158	-0.612472		682.158	-0.125307		682.158	-0.0925776
682.713	-0.0133941		682.713	-0.609574		682.713	-0.122667		682.713	-0.11572
683.268	-0.0172842		683.268	-0.582297		683.268	-0.134824		683.268	-0.124635
683.823	-0.0966198		683.823	-0.575882		683.823	-0.147772		683.823	-0.133856
684.378	-0.147905		684.378	-0.569618		684.378	-0.158074		684.378	-0.144727
684.933	-0.0391247		684.933	-0.577793		684.933	-0.154282		684.933	-0.149799
685.488	-0.00772638		685.488	-0.596778		685.488	-0.13404		685.488	-0.133234
686.043	0.0159261		686.043	-0.59977		686.043	-0.146819		686.043	-0.117495
686.598	0.0407133		686.598	-0.621612		686.598	-0.163401		686.598	-0.0997097
687.153	0.0174999		687.153	-0.566269		687.153	-0.164965		687.153	-0.0983746
687.708	-0.0707492		687.708	-0.553875		687.708	-0.168408		687.708	-0.0945705
688.263	0.0152297		688.263	-0.590588		688.263	-0.159883		688.263	-0.0896076
688.818	-0.047789		688.818	-0.483966		688.818	-0.14608		688.818	-0.0886615
689.373	-0.0463498		689.373	-0.538164		689.373	-0.13941		689.373	-0.0930955
689.928	-0.034828		689.928	-0.460134		689.928	-0.143414		689.928	-0.0965952
690.483	-0.0191113		690.483	-0.458739		690.483	-0.150209		690.483	-0.087503
691.038	0.00910173		691.038	-0.528341		691.038	-0.171495		691.038	-0.073605
691.594	0.050165		691.594	-0.55316		691.594	-0.181546		691.594	-0.0471352
692.149	0.105871		692.149	-0.526552		692.149	-0.172846		692.149	-0.078391
692.704	0.12972		692.704	-0.587366		692.704	-0.168602		692.704	-0.0900472
693.259	0.0693194		693.259	-0.574243		693.259	-0.149204		693.259	-0.11179
693.814	0.106849		693.814	-0.613807		693.814	-0.14097		693.814	-0.111913
694.369	0.19282		694.369	-0.661615		694.369	-0.115851		694.369	-0.101966
694.924	0.130154		694.924	-0.665773		694.924	-0.136299		694.924	-0.0932019
695.479	0.152223		695.479	-0.625507		695.479	-0.123198		695.479	-0.115706
696.034	0.126078		696.034	-0.683268		696.034	-0.141719		696.034	-0.111517
696.589	0.0787396		696.589	-0.627344		696.589	-0.146937		696.589	-0.105168
697.144	0.0370036		697.144	-0.614368		697.144	-0.15287		697.144	-0.0802147
697.699	0.0368882		697.699	-0.579025		697.699	-0.14978		697.699	-0.0480709
698.254	0.00932587		698.254	-0.5586		698.254	-0.161106		698.254	-0.0386987
698.81	-0.0158459		698.81	-0.566221		698.81	-0.154044		698.81	-0.0312277
699.365	0.0143965		699.365	-0.609535		699.365	-0.163494		699.365	-0.0345211
699.92	0.0709094		699.92	-0.578171		699.92	-0.166412		699.92	-0.0459187
700.475	0.0860834		700.475	-0.605808		700.475	-0.168449		700.475	-0.0501774
701.03	0.0608644		701.03	-0.623442		701.03	-0.174676		701.03	-0.0644701
701.585	-0.0242244		701.585	-0.623325		701.585	-0.161356		701.585	-0.0827861
702.14	0.0248898		702.14	-0.69421		702.14	-0.181587		702.14	-0.0926462
702.695	0.0650354		702.695	-0.67408		702.695	-0.194532		702.695	-0.0964623
703.25	0.0772488		703.25	-0.666044		703.25	-0.174712		703.25	-0.122975
703.806	0.109457		703.806	-0.642236		703.806	-0.166471		703.806	-0.117958
704.361	0.0953469		704.361	-0.662574		704.361	-0.149864		704.361	-0.103568
704.916	0.114546		704.916	-0.639408		704.916	-0.128743		704.916	-0.0793835
705.471	0.158163		705.471	-0.652763		705.471	-0.127882		705.471	-0.0616834
706.026	0.173125		706.026	-0.606927		706.026	-0.128805		706.026	-0.0508822
706.581	0.108395		706.581	-0.667212		706.581	-0.0941407		706.581	-0.0717525
707.136	0.0876238		707.136	-0.655654		707.136	-0.09075		707.136	-0.0724965
707.692	0.0789064		707.692	-0.63702		707.692	-0.116101		707.692	-0.0636652
708.247	0.161651		708.247	-0.562498		708.247	-0.13984		708.247	-0.0630097
708.802	0.146863		708.802	-0.676927		708.802	-0.145169		708.802	-0.0736525
709.357	0.0402135		709.357	-0.629834		709.357	-0.153091		709.357	-0.104131
709.912	0.0753979		709.912	-0.621432		709.912	-0.130686		709.912	-0.115261
710.467	0.201005		710.467	-0.562972		710.467	-0.150531		710.467	-0.128034
711.023	0.156456		711.023	-0.545998		711.023	-0.172454		711.023	-0.117095
711.578	0.140094		711.578	-0.551877		711.578	-0.183053		711.578	-0.0998773
712.133	0.0688865		712.133	-0.604121		712.133	-0.140367		712.133	-0.0868593
712.688	0.0481146		712.688	-0.511204		712.688	-0.110224		712.688	-0.111437
713.243	0.0896864		713.243	-0.504414		713.243	-0.101665		713.243	-0.121873
713.799	-0.0425607		713.799	-0.553684		713.799	-0.121345		713.799	-0.163784
714.354	0.0143418		714.354	-0.557547		714.354	-0.142514		714.354	-0.171239
714.909	0.0981669		714.909	-0.521594		714.909	-0.150708		714.909	-0.173156
715.464	0.127405		715.464	-0.509702		715.464	-0.138377		715.464	-0.128721
716.02	0.132975		716.02	-0.511665		716.02	-0.112897		716.02	-0.123759
716.575	0.186419		716.575	-0.547234		716.575	-0.109314		716.575	-0.112852
717.13	0.0353024		717.13	-0.554083		717.13	-0.0951371		717.13	-0.116651
717.685	0.124335		717.685	-0.459661		717.685	-0.0845939		717.685	-0.132464
718.24	0.159506		718.24	-0.431728		718.24	-0.096112		718.24	-0.150549
718.796	0.208648		718.796	-0.408713		718.796	-0.103398		718.796	-0.109128
719.351	0.13978		719.351	-0.446276		719.351	-0.118417		719.351	-0.0956891
719.906	0.0829817		719.906	-0.458838		719.906	-0.099026		719.906	-0.0911222
720.462	0.0872777		720.462	-0.358515		720.462	-0.0764202		720.462	-0.0825107
721.017	0.0738232		721.017	-0.406945		721.017	-0.046476		721.017	-0.11179
721.572	0.0322023		721.572	-0.424011		721.572	-0.0374883		721.572	-0.141796
722.127	0.0397671		722.127	-0.436754		722.127	-0.0278623		722.127	-0.120839
722.683	0.0954476		722.683	-0.500412		722.683	-0.032808		722.683	-0.105666
723.238	0.173487		723.238	-0.508814		723.238	-0.0480584		723.238	-0.105201
723.793	0.117461		723.793	-0.473943		723.793	-0.105513		723.793	-0.0708826
724.349	0.0484973		724.349	-0.623284		724.349	-0.132299		724.349	-0.0720081
724.904	-0.045446		724.904	-0.697419		724.904	-0.138294		724.904	-0.0675535
725.459	-0.100558		725.459	-0.58849		725.459	-0.140988		725.459	-0.0756281
726.015	0.0235206		726.015	-0.552937		726.015	-0.0953941		726.015	-0.0941662
726.57	-0.0459067		726.57	-0.674125		726.57	-0.0864221		726.57	-0.1223
727.125	-0.137959		727.125	-0.672293		727.125	-0.11257		727.125	-0.117486
727.681	-0.229855		727.681	-0.588042		727.681	-0.0964198		727.681	-0.121387
728.236	-0.227802		728.236	-0.448017		728.236	-0.0785528		728.236	-0.0922848
728.791	-0.0066531		728.791	-0.384		728.791	-0.0866568		728.791	-0.0984751
729.347	0.0225698		729.347	-0.469839		729.347	-0.0924691		729.347	-0.127035
729.902	0.00544463		729.902	-0.329711		729.902	-0.102708		729.902	-0.144572
730.457	0.143075		730.457	-0.469855		730.457	-0.118573		730.457	-0.160165
731.013	0.15697		731.013	-0.617927		731.013	-0.124871		731.013	-0.162553
731.568	0.301405		731.568	-0.625883		731.568	-0.102598		731.568	-0.137001
732.124	0.21669		732.124	-0.58206		732.124	-0.112015		732.124	-0.135258
732.679	0.133945		732.679	-0.696426		732.679	-0.141591		732.679	-0.158624
733.234	0.0736913		733.234	-0.677763		733.234	-0.179493		733.234	-0.174582
733.79	0.0420787		733.79	-0.67991		733.79	-0.225669		733.79	-0.18882
734.345	0.0370706		734.345	-0.587422		734.345	-0.234812		734.345	-0.185298
734.901	-0.100219		734.901	-0.652798		734.901	-0.176276		734.901	-0.165964
735.456	-0.03087		735.456	-0.613473		735.456	-0.174863		735.456	-0.151878
736.012	-0.110563		736.012	-0.632856		736.012	-0.196516		736.012	-0.1291
736.567	-0.0316312		736.567	-0.535358		736.567	-0.236931		736.567	-0.102243
737.122	-0.0966431		737.122	-0.510251		737.122	-0.229924		737.122	-0.0888001
737.678	-0.108076		737.678	-0.540327		737.678	-0.128649		737.678	-0.100565
738.233	-0.0951075		738.233	-0.567499		738.233	-0.0142063		738.233	-0.10728
738.789	0.0782654		738.789	-0.527621		738.789	-0.0262781		738.789	-0.0763044
739.344	0.0719942		739.344	-0.609927		739.344	-0.0664625		739.344	-0.111256
739.9	0.190257		739.9	-0.454426		739.9	-0.0928498		739.9	-0.1044
740.455	0.149932		740.455	-0.402141		740.455	-0.219512		740.455	-0.122912
741.011	0.266933		741.011	-0.449966		741.011	-0.278005		741.011	-0.105452
741.566	0.534485		741.566	-0.420312		741.566	-0.413869		741.566	-0.0847831
742.122	0.339372		742.122	-0.210176		742.122	-0.510176		742.122	-0.0852914
742.677	0.105948		742.677	-0.0960235		742.677	-0.486295		742.677	-0.11565
743.233	0.202603		743.233	-0.212224		743.233	-0.28265		743.233	-0.107323
743.789	0.0281893		743.789	-0.289827		743.789	-0.16191		743.789	-0.144317
744.344	0.162562		744.344	-0.508715		744.344	0.0300375		744.344	-0.106922
744.9	0.0411637		744.9	-0.284968		744.9	0.028554		744.9	-0.0690879
745.455	0.149096		745.455	-0.460947		745.455	0.0351847		745.455	-0.0766739
746.011	0.317961		746.011	-0.298679		746.011	0.0290664		746.011	-0.0457372
746.566	0.340117		746.566	-0.61608		746.566	0.103538		746.566	-0.0225419
747.122	0.209423		747.122	-0.426345		747.122	0.0121007		747.122	-0.040797
747.678	0.0177275		747.678	-0.472312		747.678	-0.117132		747.678	0.0328412
748.233	-0.0178653		748.233	-0.326074		748.233	-0.254731		748.233	0.0987189
748.789	0.227762		748.789	-0.280049		748.789	-0.305684		748.789	-0.0433529
749.344	0.149193		749.344	-0.618376		749.344	-0.257934		749.344	-0.168048
749.9	0.120253		749.9	-0.895683		749.9	-0.138067		749.9	-0.245343

## Sheet: Fig2d
ErCry4			GgCry4			ClCry4
0.25	-2.7325		0.25	-0.4901		0.25	-0.8223
0.45	-3.02		0.45	-0.64915		0.45	-0.2117
0.65	-3.6906		0.65	0.2146		0.65	-0.7765
0.85	-3.55825		0.85	0.5093		0.85	-0.2698
1	-3.3959		1	-0.1544		1	-0.2681
2.5	-3.6078		2.5	0.3178		2.5	0.3712
5	-4.1271		5	-0.8458		5	0.0442
10	-3.0351		10	-0.1599		10	-0.4172
