# Supplementary material for: Magnetic sensitivity of cryptochrome 4 from a migratory songbird
Source: Springer Nature journal article supplement (doi:10.1038/s41586-021-03618-9), 2021-06-23
Supplement: MOESM5 [file 41586_2021_3618_MOESM5_ESM.xlsx]

## Sheet: Fig 3a
WT			WDF
342.552	0.0118932		341.825	-0.0141361
342.585	0.00402932		341.861	-0.0168227
342.619	-0.00124656		341.896	-0.0174551
342.653	-0.00182624		341.931	0.00462757
342.687	0.0165219		341.966	0.0175116
342.721	-0.00294238		342.002	0.0184969
342.754	-0.0268858		342.037	0.00119718
342.788	0.0316547		342.072	-0.0083144
342.822	-0.0356105		342.108	-0.023231
342.856	-0.0286011		342.143	0.0194346
342.889	0.0115985		342.178	0.0237193
342.923	0.0148038		342.213	-0.00370937
342.957	-0.0170914		342.249	0.00466344
342.991	-0.0179162		342.284	0.0047137
343.024	0.0172493		342.319	0.0016352
343.058	0.00271158		342.354	-0.0214382
343.092	-0.0314739		342.389	-0.0123474
343.126	0.00874354		342.425	0.00195922
343.16	0.0175607		342.46	-0.00572633
343.194	-0.0210158		342.495	-0.0028696
343.228	-0.00791643		342.531	-0.0247476
343.261	0.0103312		342.566	-0.00997672
343.295	-0.0268499		342.601	-0.00835041
343.329	0.00151466		342.636	0.0108867
343.362	0.0109868		342.672	-0.00457806
343.396	-0.0190663		342.707	0.0175434
343.43	0.00522		342.742	0.00992732
343.464	0.0156641		342.778	0.00107251
343.498	-0.0218776		342.813	0.000916728
343.532	-0.00622899		342.848	0.00801723
343.565	0.0401743		342.883	0.0071159
343.599	0.0159202		342.919	0.0079208
343.633	0.0349585		342.954	-0.0128655
343.666	0.0237899		342.989	-0.00683228
343.7	0.00404754		343.024	-0.00635088
343.734	0.00325533		343.059	0.00242496
343.768	0.0224208		343.095	-0.00711328
343.802	0.0197897		343.13	-0.000518842
343.836	-0.0100816		343.166	0.0143923
343.869	0.0144445		343.201	0.018512
343.903	-0.0106109		343.236	0.0303739
343.937	0.0374594		343.271	0.0246818
343.971	0.0212142		343.306	0.0170342
344.004	0.0308363		343.342	0.00340223
344.038	0.032479		343.377	0.00312153
344.072	0.0338351		343.412	-0.0114133
344.106	0.0115679		343.447	0.0357632
344.14	0.0141053		343.483	0.0349661
344.173	0.00529814		343.518	0.0306049
344.207	0.00585933		343.553	0.00852147
344.241	0.0383932		343.589	0.0177115
344.275	0.0353845		343.624	0.0100245
344.308	0.0303312		343.659	-0.00152337
344.342	0.0327138		343.694	0.0208277
344.376	0.054997		343.729	0.00881401
344.41	0.0289051		343.765	0.0318314
344.443	0.0296976		343.8	0.0254019
344.478	0.0552338		343.836	0.0348715
344.511	0.0617053		343.871	0.036811
344.545	0.0912127		343.906	0.0405187
344.579	0.0683284		343.941	0.0410968
344.613	0.00591862		343.976	0.0361256
344.646	0.0878425		344.012	0.0713782
344.68	0.0826296		344.047	0.0552868
344.714	0.0286962		344.082	0.0534206
344.748	0.0566161		344.117	0.0661522
344.781	0.053011		344.153	0.0446037
344.815	0.0720748		344.188	0.0510178
344.849	0.124903		344.223	0.0350423
344.883	0.0870039		344.259	0.0648834
344.917	0.0889895		344.294	0.0504946
344.95	0.0823763		344.329	0.0931952
344.984	0.0851368		344.364	0.0917661
345.018	0.0751452		344.399	0.0602309
345.052	0.0793784		344.435	0.0451094
345.085	0.0919926		344.47	0.0864156
345.119	0.0745716		344.505	0.0864616
345.153	0.075908		344.541	0.0949012
345.187	0.0893991		344.576	0.0745987
345.221	0.0872531		344.611	0.106888
345.255	0.0693999		344.647	0.109171
345.288	0.0931315		344.682	0.110183
345.322	0.10351		344.717	0.138456
345.356	0.0677496		344.752	0.150728
345.389	0.0685071		344.787	0.116585
345.423	0.112712		344.822	0.123953
345.457	0.0925848		344.858	0.123559
345.491	0.0566089		344.893	0.130585
345.525	0.05869		344.929	0.145451
345.559	0.0422227		344.964	0.135207
345.592	0.000729782		344.999	0.109268
345.626	-0.016767		345.034	0.102205
345.66	0.0143859		345.069	0.10007
345.694	-0.00500967		345.105	0.123563
345.727	0.0013999		345.14	0.133163
345.761	0.0500449		345.175	0.100337
345.795	0.00213035		345.21	0.124205
345.829	-0.000751855		345.246	0.0895385
345.863	-0.014961		345.281	0.0747061
345.896	0.0173094		345.317	0.0624989
345.93	0.0045264		345.352	0.0644756
345.964	0.0110349		345.387	0.0271585
345.998	-0.0147254		345.422	0.0300901
346.031	-0.0454143		345.457	0.0119023
346.065	-0.0138214		345.493	0.00309257
346.099	-0.0776271		345.528	-0.0384164
346.133	-0.116064		345.563	-0.0449385
346.167	-0.113968		345.599	-0.0521409
346.2	-0.153194		345.634	-0.0667819
346.234	-0.225575		345.669	-0.0376912
346.268	-0.193769		345.704	-0.0593081
346.302	-0.290056		345.74	-0.0523355
346.335	-0.30055		345.775	-0.0368221
346.369	-0.335393		345.81	-0.0310858
346.403	-0.319181		345.845	-0.0487939
346.437	-0.253278		345.88	-0.0451613
346.471	-0.25627		345.916	-0.0607762
346.505	-0.20932		345.951	-0.0889063
346.538	-0.178964		345.986	-0.0863593
346.572	-0.20539		346.022	-0.056502
346.606	-0.232089		346.057	-0.0714113
346.639	-0.295864		346.092	-0.0692886
346.673	-0.35887		346.127	-0.0583361
346.707	-0.407356		346.162	-0.0857109
346.741	-0.536137		346.198	-0.0293636
346.775	-0.641337		346.233	-0.0570416
346.809	-0.675031		346.268	-0.0616023
346.842	-0.747927		346.304	-0.0130673
346.876	-0.867036		346.339	-0.0373386
346.91	-0.892382		346.374	-0.0704173
346.944	-0.919879		346.409	-0.0618134
346.977	-0.981374		346.445	-0.0857094
347.011	-0.993689		346.48	-0.154469
347.045	-0.944764		346.515	-0.216092
347.079	-0.901306		346.55	-0.277894
347.113	-0.833432		346.586	-0.377905
347.147	-0.715613		346.621	-0.414971
347.18	-0.624032		346.656	-0.479951
347.214	-0.508801		346.692	-0.511932
347.248	-0.395021		346.727	-0.537778
347.282	-0.342867		346.762	-0.586276
347.315	-0.300938		346.797	-0.611598
347.349	-0.322616		346.832	-0.6581
347.383	-0.350898		346.868	-0.687095
347.417	-0.36822		346.903	-0.743992
347.45	-0.354003		346.938	-0.773922
347.484	-0.403892		346.973	-0.822574
347.518	-0.370118		347.009	-0.85846
347.552	-0.338655		347.044	-0.89673
347.586	-0.328238		347.079	-0.94823
347.62	-0.201618		347.115	-0.987779
347.653	-0.184802		347.15	-1
347.687	-0.123327		347.185	-0.981392
347.721	-0.0212585		347.22	-0.968472
347.755	0.0901937		347.256	-0.938769
347.788	0.178243		347.291	-0.885662
347.822	0.315788		347.326	-0.787421
347.856	0.459855		347.362	-0.774273
347.89	0.59153		347.397	-0.689939
347.924	0.666477		347.432	-0.618482
347.957	0.706137		347.467	-0.545525
347.991	0.809656		347.503	-0.48486
348.025	0.821672		347.538	-0.385935
348.058	0.81468		347.573	-0.332893
348.092	0.792475		347.608	-0.283299
348.126	0.74458		347.644	-0.177048
348.16	0.752811		347.679	-0.0757644
348.194	0.764498		347.714	0.00248833
348.228	0.741029		347.749	0.0912245
348.262	0.726235		347.785	0.151292
348.295	0.687809		347.82	0.225444
348.329	0.635372		347.855	0.311442
348.363	0.626297		347.89	0.380052
348.396	0.598533		347.926	0.450463
348.43	0.584373		347.961	0.534791
348.464	0.604042		347.996	0.610209
348.498	0.584632		348.031	0.65369
348.532	0.649568		348.067	0.686659
348.566	0.613487		348.102	0.739005
348.599	0.622761		348.137	0.774149
348.633	0.589124		348.173	0.813477
348.667	0.53336		348.208	0.825132
348.7	0.46745		348.243	0.839408
348.734	0.408869		348.278	0.85954
348.768	0.343602		348.313	0.837454
348.802	0.242925		348.349	0.873803
348.836	0.170527		348.384	0.842577
348.87	0.132128		348.42	0.765427
348.904	0.0724165		348.455	0.764766
348.937	0.0731707		348.49	0.743466
348.971	-0.042983		348.525	0.678715
349.005	-0.0344979		348.561	0.658191
349.038	-0.0399778		348.596	0.588763
349.072	0.00435812		348.631	0.569878
349.106	0.0193912		348.666	0.568019
349.14	0.0593235		348.701	0.541072
349.174	0.10104		348.737	0.47151
349.208	0.182186		348.772	0.479661
349.241	0.166566		348.808	0.436705
349.275	0.203369		348.843	0.410059
349.309	0.169354		348.878	0.37962
349.342	0.157354		348.913	0.30482
349.376	0.119529		348.948	0.276227
349.41	0.0615724		348.983	0.237117
349.444	0.0209681		349.019	0.172441
349.478	-0.0439979		349.054	0.169865
349.512	-0.0446851		349.089	0.118154
349.545	-0.00599459		349.125	0.0934073
349.579	-0.104064		349.16	0.0756425
349.613	-0.0908676		349.195	0.0592476
349.647	-0.0893009		349.231	0.0964137
349.68	-0.0924791		349.266	0.10842
349.714	-0.0724499		349.301	0.135734
349.748	-0.0391247		349.336	0.132457
349.782	0.0299263		349.371	0.135858
349.816	0.0332254		349.406	0.126139
349.849	0.021705		349.442	0.138288
349.883	0.0230513		349.477	0.125692
349.917	0.0395853		349.513	0.133281
349.951	0.0888247		349.548	0.105831
349.984	0.0663764		349.583	0.124067
350.018	0.073019		349.618	0.116629
350.052	0.0866785		349.653	0.126016
350.086	0.0478937		349.689	0.124619
350.12	0.0417412		349.724	0.151849
350.154	0.0570376		349.759	0.139253
350.187	0.0269058		349.794	0.145274
350.221	-0.0360976		349.83	0.141393
350.255	-0.0205119		349.865	0.140043
350.289	-0.011941		349.901	0.134019
350.322	-0.024005		349.936	0.144678
350.356	-0.0530293		349.971	0.137623
350.39	-0.0491468		350.006	0.136581
350.424	-0.0639038		350.041	0.124576
350.457	-0.0207857		350.077	0.12715
350.491	-0.0172563		350.112	0.131853
350.525	0.00786244		350.147	0.127676
350.559	-0.0203153		350.183	0.0762721
350.593	-0.0433197		350.218	0.0573755
350.627	-0.0513519		350.253	0.0526529
350.66	-0.0570205		350.288	0.0492929
350.694	-0.0398005		350.324	0.0878726
350.728	-0.0668304		350.359	0.0445913
350.761	-0.0685352		350.394	0.0318332
350.795	-0.054445		350.429	0.00768509
350.829	-0.0119983		350.464	0.00380333
350.863	-0.000638211		350.5	-0.0166276
350.897	-0.0295931		350.535	-0.0374145
350.931	-0.0412952		350.57	-0.0224659
350.964	-0.0509328		350.606	-0.0135927
350.998	-0.0405254		350.641	-0.0322211
351.032	-0.0358585		350.676	-0.0243435
351.065	-0.0668694		350.711	-0.0257272
351.099	-0.0814083		350.747	-0.0660567
351.133	-0.0663226		350.782	-0.053481
351.167	-0.0370202		350.817	-0.0441604
351.201	-0.0434506		350.852	-0.0396662
351.235	-0.0456333		350.888	-0.042961
351.268	-0.0520987		350.923	-0.0604553
351.302	-0.0332203		350.958	-0.0457426
351.336	-0.0588522		350.993	-0.0629863
351.37	-0.0253111		351.029	-0.0789465
351.403	-0.0219238		351.064	-0.0628465
351.437	-0.0254721		351.099	-0.0707589
351.471	-0.0107247		351.135	-0.0579233
351.505	-0.0203018		351.17	-0.0365061
351.539	-0.00880343		351.205	-0.0602606
351.572	-0.0295394		351.24	-0.0466685
351.606	-0.0153487		351.276	-0.0646155
351.64	0.0271489		351.311	-0.0393476
351.674	-0.00187883		351.346	-0.0263729
351.707	-0.00380825		351.381	-0.006615
351.741	-0.0225978		351.417	-0.016176
351.775	-0.043403		351.452	-0.0265703
351.809	-0.0384896		351.487	-0.0155608
351.843	0.00452178		351.522	-0.052496
351.877	-0.000725459		351.558	-0.0217432
351.91	-0.0321285		351.593	-0.0181706
351.944	-0.0104323		351.628	-0.00636083
351.978	-0.0207185		351.664	-0.00377597
352.012	-0.00666184		351.699	-0.0144766
352.045	-0.00484939		351.734	-0.0292594
352.079	0.00445697		351.769	-0.0189286
352.113	-0.00767175		351.805	0.00762407
352.147	-0.0159831		351.84	0.0142066
352.181	-0.0179763		351.875	-0.00359264
352.214	0.012543		351.91	-0.00159794
352.248	0.0136916		351.946	0.009168
352.282	-0.00453895		351.981	0.000140973
352.316	-0.0145635		352.016	-0.00228737
352.349	-0.0349672		352.052	0.00612496
352.383	-0.0164589		352.087	0.0105375
352.417	0.0228429		352.122	-0.0126587
352.451	-0.00232231		352.157	-0.00338629
352.485	0.0136103		352.192	-0.0117766
352.518	-0.00870768		352.228	-0.000721814
352.552	-0.0266742		352.263	-0.00544198
352.586	0.00820933		352.298	-0.0280801
352.62	0.0122405		352.334	0.000656708
352.654	-0.00543898		352.369	0.0112574
352.687	0.00667221		352.404	0.0128056
352.692	0.00356912		352.44	-0.00905391
352.727	0.0148059		352.474	0.0111466
352.763	-0.000728433		352.51	0.00706274
352.798	-0.00410868		352.545	0.0321992
352.834	0.00680738		352.58	0.0017273
352.869	-0.00146303		352.615	0.0258779
352.905	-0.000485522		352.651	0.0206476
352.94	0.0200276		352.686	0.0466321
352.976	0.00884199		352.721	0.0183191
353.011	-0.0140118		352.757	0.0253451
353.046	-0.00698767		352.792	0.025976
353.082	0.0504154		352.827	0.0348838
353.118	-0.0123884		352.862	0.0207115
353.153	-0.0215053		352.897	0.0348781
353.188	-0.00544936		352.933	0.0237308
			352.968	0.0243224
			353.004	0.00660885
			353.039	0.00645845
			353.074	-0.00867017
			353.109	-0.0172711
			353.145	0.00857494
			353.18	-0.000665977
			353.215	-0.00664964
			353.25	0.00823009
			353.285	0.00995551
			353.321	0.0157451
			353.356	0.0112127
			353.392	-0.00477108
			353.427	0.00167587

## Sheet: Fig 3b
WT			WDF
0.08	0.546804		0.08	-0.265234
0.084	0.576209		0.084	-0.372203
0.088	0.637575		0.088	-0.418205
0.092	0.715671		0.092	-0.399482
0.096	0.796061		0.096	-0.405453
0.1	0.85986		0.1	-0.376532
0.104	0.921633		0.104	-0.388845
0.108	0.970878		0.108	-0.393923
0.112	1.00208		0.112	-0.417839
0.116	1.01802		0.116	-0.493846
0.12	1.05621		0.12	-0.562879
0.124	1.05928		0.124	-0.684278
0.128	1.05598		0.128	-0.788767
0.132	1.05554		0.132	-0.867975
0.136	1.04397		0.136	-0.949478
0.14	1.03185		0.14	-1.04115
0.144	1.02381		0.144	-1.08949
0.148	0.991589		0.148	-1.13283
0.152	0.949429		0.152	-1.09994
0.156	0.915729		0.156	-1.12091
0.16	0.882458		0.16	-1.12509
0.164	0.846293		0.164	-1.04417
0.168	0.789368		0.168	-0.972896
0.172	0.749995		0.172	-0.913003
0.176	0.718553		0.176	-0.840781
0.18	0.682436		0.18	-0.744853
0.184	0.639072		0.184	-0.6491
0.188	0.593828		0.188	-0.5239
0.192	0.534155		0.192	-0.440677
0.196	0.484156		0.196	-0.350055
0.2	0.428461		0.2	-0.271812
0.204	0.357549		0.204	-0.20743
0.208	0.293086		0.208	-0.148089
0.212	0.229		0.212	-0.124914
0.216	0.170946		0.216	-0.124426
0.22	0.122078		0.22	-0.150636
0.224	0.0890286		0.224	-0.222651
0.228	0.0712738		0.228	-0.296144
0.232	0.0560033		0.232	-0.424277
0.236	0.0737751		0.236	-0.549113
0.24	0.0973313		0.24	-0.659344
0.244	0.148738		0.244	-0.768828
0.248	0.207638		0.248	-0.916737
0.252	0.269727		0.252	-0.999595
0.256	0.341724		0.256	-1.06106
0.26	0.416681		0.26	-1.10959
0.264	0.476355		0.264	-1.11109
0.268	0.553696		0.268	-1.08778
0.272	0.62043		0.272	-1.07399
0.276	0.683793		0.276	-1.02631
0.28	0.741723		0.28	-0.9525
0.284	0.796735		0.284	-0.86493
0.288	0.834485		0.288	-0.80656
0.292	0.871796		0.292	-0.744652
0.296	0.901645		0.296	-0.691992
0.3	0.921556		0.3	-0.62738
0.304	0.941288		0.304	-0.577082
0.308	0.937671		0.308	-0.518085
0.312	0.953887		0.312	-0.461602
0.316	0.933989		0.316	-0.450605
0.32	0.929536		0.32	-0.396836
0.324	0.911348		0.324	-0.399305
0.328	0.885867		0.328	-0.381263
0.332	0.868582		0.332	-0.391778
0.336	0.845067		0.336	-0.419512
0.34	0.812757		0.34	-0.445779
0.344	0.787686		0.344	-0.49166
0.348	0.753158		0.348	-0.528046
0.352	0.726774		0.352	-0.597214
0.356	0.702387		0.356	-0.646991
0.36	0.687896		0.36	-0.710386
0.364	0.66725		0.364	-0.738254
0.368	0.648866		0.368	-0.761837
0.372	0.628925		0.372	-0.811443
0.376	0.622143		0.376	-0.812581
0.38	0.61368		0.38	-0.829615
0.384	0.594693		0.384	-0.81816
0.388	0.573973		0.388	-0.817906
0.392	0.566578		0.392	-0.81474
0.396	0.554236		0.396	-0.782625
0.4	0.534659		0.4	-0.763248
0.404	0.524144		0.404	-0.753567
0.408	0.510161		0.408	-0.728395
0.412	0.487414		0.412	-0.713184
0.416	0.469395		0.416	-0.647978
0.42	0.460256		0.42	-0.619904
0.424	0.468542		0.424	-0.597371
0.428	0.499625		0.428	-0.582226
0.432	0.557405		0.432	-0.540595
0.436	0.609884		0.436	-0.538685
0.44	0.647212		0.44	-0.506757
0.444	0.66221		0.444	-0.507874
0.448	0.65943		0.448	-0.467935
0.452	0.67028		0.452	-0.521281
0.456	0.69321		0.456	-0.537321
0.46	0.726804		0.46	-0.557754
0.464	0.760394		0.464	-0.581053
0.468	0.793216		0.468	-0.609687
0.472	0.823188		0.472	-0.671978
0.476	0.845108		0.476	-0.696908
0.48	0.862451		0.48	-0.735691
0.484	0.86265		0.484	-0.774752
0.488	0.868832		0.488	-0.772564
0.492	0.858846		0.492	-0.803725
0.496	0.864219		0.496	-0.805062
0.5	0.850348		0.5	-0.799128
0.504	0.837474		0.504	-0.817103
0.508	0.829718		0.508	-0.78669
0.512	0.81089		0.512	-0.760182
0.516	0.800796		0.516	-0.72108
0.52	0.78211		0.52	-0.693979
0.524	0.765749		0.524	-0.678717
0.528	0.747032		0.528	-0.644246
0.532	0.729762		0.532	-0.616161
0.536	0.69992		0.536	-0.586774
0.54	0.681012		0.54	-0.557766
0.544	0.66103		0.544	-0.554337
0.548	0.639787		0.548	-0.545076
0.552	0.616636		0.552	-0.526729
0.556	0.598778		0.556	-0.5311
0.56	0.57668		0.56	-0.517048
0.564	0.553072		0.564	-0.535141
0.568	0.52881		0.568	-0.518817
0.572	0.515135		0.572	-0.529199
0.576	0.499413		0.576	-0.542985
0.58	0.489574		0.58	-0.563547
0.584	0.48331		0.584	-0.574119
0.588	0.473905		0.588	-0.618751
0.592	0.477069		0.592	-0.618794
0.596	0.487459		0.596	-0.643282
0.6	0.498091		0.6	-0.665667
0.604	0.503872		0.604	-0.693257
0.608	0.515923		0.608	-0.706275
0.612	0.536863		0.612	-0.719049
0.616	0.564783		0.616	-0.719721
0.62	0.574266		0.62	-0.716637
0.624	0.604115		0.624	-0.728367
0.628	0.621136		0.628	-0.716513
0.632	0.645208		0.632	-0.719047
0.636	0.670678		0.636	-0.705399
0.64	0.690457		0.64	-0.701402
0.644	0.707535		0.644	-0.680703
0.648	0.732603		0.648	-0.660316
0.652	0.749687		0.652	-0.646714
0.656	0.759263		0.656	-0.644502
0.66	0.778253		0.66	-0.635143
0.664	0.787808		0.664	-0.620126
0.668	0.792958		0.668	-0.622716
0.672	0.802103		0.672	-0.630135
0.676	0.791347		0.676	-0.63965
0.68	0.795683		0.68	-0.631323
0.684	0.785663		0.684	-0.648782
0.688	0.779559		0.688	-0.637068
0.692	0.769239		0.692	-0.655563
0.696	0.753884		0.696	-0.629418
0.7	0.738433		0.7	-0.666366
0.704	0.731595		0.704	-0.698418
0.708	0.720271		0.708	-0.692544
0.712	0.692867		0.712	-0.721489
0.716	0.679744		0.716	-0.723396
0.72	0.667804		0.72	-0.741839
0.724	0.657625		0.724	-0.765721
0.728	0.644828		0.728	-0.740438
0.732	0.634173		0.732	-0.739529
0.736	0.62004		0.736	-0.726927
0.74	0.609758		0.74	-0.739775
0.744	0.601291		0.744	-0.714358
0.748	0.608278		0.748	-0.700141
0.752	0.60053		0.752	-0.696865
0.756	0.59444		0.756	-0.690737
0.76	0.589792		0.76	-0.682827
0.764	0.585117		0.764	-0.654325
0.768	0.589287		0.768	-0.641356
0.772	0.580217		0.772	-0.618071
0.776	0.572152		0.776	-0.616958
0.78	0.577314		0.78	-0.622502
0.784	0.5781		0.784	-0.619489
0.788	0.584647		0.788	-0.585772
0.792	0.594141		0.792	-0.583642
0.796	0.595525		0.796	-0.593047
0.8	0.600959		0.8	-0.594018
0.804	0.621886		0.804	-0.562847
0.808	0.627233		0.808	-0.595973
0.812	0.646752		0.812	-0.59844
0.816	0.658597		0.816	-0.597827
0.82	0.662554		0.82	-0.599685
0.824	0.691627		0.824	-0.619268
0.828	0.695865		0.828	-0.606198
0.832	0.705139		0.832	-0.622758
0.836	0.728177		0.836	-0.649894
0.84	0.734993		0.84	-0.629203
0.844	0.740836		0.844	-0.641413
0.848	0.737689		0.848	-0.651888
0.852	0.742397		0.852	-0.642067
0.856	0.735132		0.856	-0.640462
0.86	0.745613		0.86	-0.629347
0.864	0.74847		0.864	-0.637231
0.868	0.738291		0.868	-0.643277
0.872	0.733739		0.872	-0.615734
0.876	0.726217		0.876	-0.626703
0.88	0.716195		0.88	-0.651352
0.884	0.712652		0.884	-0.631775
0.888	0.703512		0.888	-0.612683
0.892	0.688814		0.892	-0.642559
0.896	0.670947		0.896	-0.643571
0.9	0.656746		0.9	-0.624459
0.904	0.648321		0.904	-0.618338
0.908	0.633253		0.908	-0.603875
0.912	0.620142		0.912	-0.62694
0.916	0.615068		0.916	-0.62471
0.92	0.599314		0.92	-0.645296
0.924	0.590086		0.924	-0.636655
0.928	0.576143		0.928	-0.634416
0.932	0.569749		0.932	-0.643451
0.936	0.568473		0.936	-0.652053
0.94	0.570787		0.94	-0.65096
0.944	0.562745		0.944	-0.661127
0.948	0.567933		0.948	-0.667244
0.952	0.573734		0.952	-0.697243
0.956	0.574344		0.956	-0.690319
0.96	0.582523		0.96	-0.692897
0.964	0.595402		0.964	-0.7018
0.968	0.608323		0.968	-0.698897
0.972	0.614679		0.972	-0.698716
0.976	0.625078		0.976	-0.692828
0.98	0.631824		0.98	-0.684339
0.984	0.650615		0.984	-0.671026
0.988	0.653602		0.988	-0.668332
0.992	0.664519		0.992	-0.690885
0.996	0.676706		0.996	-0.651193
1	0.677446		1	-0.64596
1.004	0.697717		1.004	-0.654184
1.008	0.707142		1.008	-0.65898
1.012	0.707072		1.012	-0.649925
1.016	0.708811		1.016	-0.659856
1.02	0.705899		1.02	-0.645203
1.024	0.713842		1.024	-0.662617
1.028	0.716429		1.028	-0.643181
1.032	0.709946		1.032	-0.622105
1.036	0.718286		1.036	-0.649633
1.04	0.714027		1.04	-0.646508
1.044	0.712675		1.044	-0.633951
1.048	0.699117		1.048	-0.647029
1.052	0.701474		1.052	-0.620979
1.056	0.689318		1.056	-0.641874
1.06	0.679944		1.06	-0.652876
1.064	0.685146		1.064	-0.632011
1.068	0.670533		1.068	-0.629655
1.072	0.664572		1.072	-0.655574
1.076	0.657301		1.076	-0.625138
1.08	0.644854		1.08	-0.640565
1.084	0.64597		1.084	-0.643955
1.088	0.629574		1.088	-0.645419
1.092	0.629385		1.092	-0.647676
1.096	0.621804		1.096	-0.647974
1.1	0.617043		1.1	-0.664823
1.104	0.615156		1.104	-0.640888
1.108	0.612926		1.108	-0.647247
1.112	0.60429		1.112	-0.654652
1.116	0.604247		1.116	-0.63406
1.12	0.603888		1.12	-0.639345
1.124	0.601579		1.124	-0.631519
1.128	0.596063		1.128	-0.61618
1.132	0.603067		1.132	-0.610394
1.136	0.605461		1.136	-0.614356
1.14	0.608672		1.14	-0.61199
1.144	0.609702		1.144	-0.61931
1.148	0.61223		1.148	-0.625338
1.152	0.618376		1.152	-0.622566
1.156	0.628849		1.156	-0.60997
1.16	0.627475		1.16	-0.61591
1.164	0.637664		1.164	-0.595234
1.168	0.645694		1.168	-0.607044
1.172	0.653884		1.172	-0.641487
1.176	0.660916		1.176	-0.631075
1.18	0.666393		1.18	-0.605453
1.184	0.67751		1.184	-0.642457
1.188	0.678143		1.188	-0.64266
1.192	0.688429		1.192	-0.636669
1.196	0.692742		1.196	-0.638217
1.2	0.700906		1.2	-0.639255
1.204	0.694452		1.204	-0.643967
1.208	0.698909		1.208	-0.64951
1.212	0.700243		1.212	-0.642816
1.216	0.693165		1.216	-0.640505
1.22	0.697307		1.22	-0.667028
1.224	0.69135		1.224	-0.665718
1.228	0.692187		1.228	-0.65869
1.232	0.684556		1.232	-0.661386
1.236	0.680659		1.236	-0.643007
1.24	0.67488		1.24	-0.665174
1.244	0.664698		1.244	-0.666208
1.248	0.653959		1.248	-0.650555
1.252	0.653115		1.252	-0.644407
1.256	0.645722		1.256	-0.663531
1.26	0.640296		1.26	-0.665795
1.264	0.629223		1.264	-0.673167
1.268	0.625333		1.268	-0.672284
1.272	0.623411		1.272	-0.67237
1.276	0.61546		1.276	-0.66758
1.28	0.613078		1.28	-0.6481
1.284	0.61543		1.284	-0.648785
1.288	0.608017		1.288	-0.658182
1.292	0.597401		1.292	-0.666864
1.296	0.605089		1.296	-0.676447
1.3	0.607201		1.3	-0.660091
1.304	0.607833		1.304	-0.669263
1.308	0.607529		1.308	-0.681799
1.312	0.609212		1.312	-0.659568
1.316	0.616493		1.316	-0.671878
1.32	0.618496		1.32	-0.665472
1.324	0.62041		1.324	-0.671828
1.328	0.628456		1.328	-0.653298
1.332	0.633696		1.332	-0.647333
1.336	0.634152		1.336	-0.682544
1.34	0.643746		1.34	-0.674915
1.344	0.656972		1.344	-0.659081
1.348	0.653016		1.348	-0.652193
1.352	0.655918		1.352	-0.645423
1.356	0.659433		1.356	-0.675945
1.36	0.661933		1.36	-0.648448
1.364	0.66591		1.364	-0.662982
1.368	0.666188		1.368	-0.64702
1.372	0.672761		1.372	-0.655086
1.376	0.678021		1.376	-0.636646
1.38	0.680522		1.38	-0.640393
1.384	0.671322		1.384	-0.625542
1.388	0.676014		1.388	-0.637161
1.392	0.669768		1.392	-0.620668
1.396	0.669299		1.396	-0.637071
1.4	0.672824		1.4	-0.635733
1.404	0.668226		1.404	-0.647101
1.408	0.666236		1.408	-0.624125
1.412	0.660862		1.412	-0.642502
1.416	0.654535		1.416	-0.640098
1.42	0.654916		1.42	-0.642827
1.424	0.642628		1.424	-0.647959
1.428	0.650105		1.428	-0.64083
1.432	0.641889		1.432	-0.647051
1.436	0.634071		1.436	-0.63296
1.44	0.633759		1.44	-0.628186
1.444	0.632542		1.444	-0.636118
1.448	0.627857		1.448	-0.64572
1.452	0.62082		1.452	-0.651493
1.456	0.620716		1.456	-0.63353
1.46	0.620513		1.46	-0.636391
1.464	0.617129		1.464	-0.646469
1.468	0.614883		1.468	-0.641254
1.472	0.61445		1.472	-0.651777
1.476	0.613293		1.476	-0.644462
1.48	0.617481		1.48	-0.656098
1.484	0.613715		1.484	-0.639471
1.488	0.617369		1.488	-0.62099
1.492	0.622516		1.492	-0.634077
1.496	0.620269		1.496	-0.656275
1.5	0.623127		1.5	-0.642392
1.504	0.632008		1.504	-0.640752
1.508	0.631777		1.508	-0.660102
1.512	0.641462		1.512	-0.652182
1.516	0.635243		1.516	-0.654035
1.52	0.645709		1.52	-0.660235
1.524	0.648031		1.524	-0.648239
1.528	0.64958		1.528	-0.615986
1.532	0.653002		1.532	-0.651195
1.536	0.664975		1.536	-0.675467
1.54	0.662465		1.54	-0.645279
1.544	0.664952		1.544	-0.650724
1.548	0.667466		1.548	-0.644812
1.552	0.668745		1.552	-0.660163
1.556	0.674489		1.556	-0.66912
1.56	0.679786		1.56	-0.664703
1.564	0.677905		1.564	-0.670489
1.568	0.67498		1.568	-0.675267
1.572	0.680474		1.572	-0.6623
1.576	0.671612		1.576	-0.657938
1.58	0.676045		1.58	-0.639218
1.584	0.669945		1.584	-0.669321
1.588	0.664134		1.588	-0.654238
1.592	0.671356		1.592	-0.660971
1.596	0.662929		1.596	-0.652485
1.6	0.653432		1.6	-0.678716
1.604	0.656753		1.604	-0.665601
1.608	0.6538		1.608	-0.655686
1.612	0.647044		1.612	-0.631086
1.616	0.647185		1.616	-0.664482
1.62	0.640707		1.62	-0.665507
1.624	0.643431		1.624	-0.647124
1.628	0.636795		1.628	-0.657618
1.632	0.6417		1.632	-0.6624
1.636	0.630905		1.636	-0.667082
1.64	0.629469		1.64	-0.642737
1.644	0.629296		1.644	-0.646576
1.648	0.627104		1.648	-0.665599
1.652	0.625407		1.652	-0.633894
1.656	0.62401		1.656	-0.642194
1.66	0.623423		1.66	-0.636884
1.664	0.625899		1.664	-0.635988
1.668	0.632569		1.668	-0.665109
1.672	0.631207		1.672	-0.648947
1.676	0.627251		1.676	-0.633546
1.68	0.632558		1.68	-0.659521
1.684	0.636272		1.684	-0.654312
1.688	0.635108		1.688	-0.64826
1.692	0.638974		1.692	-0.64675
1.696	0.645309		1.696	-0.654722
1.7	0.645247		1.7	-0.65108
1.704	0.63826		1.704	-0.629782
1.708	0.652093		1.708	-0.654147
1.712	0.650084		1.712	-0.619518
1.716	0.657491		1.716	-0.650406
1.72	0.655446		1.72	-0.635095
1.724	0.656998		1.724	-0.652419
1.728	0.661837		1.728	-0.62628
1.732	0.659804		1.732	-0.647753
1.736	0.656572		1.736	-0.656108
1.74	0.668341		1.74	-0.641816
1.744	0.664187		1.744	-0.64996
1.748	0.667042		1.748	-0.654782
1.752	0.665089		1.752	-0.651522
1.756	0.663269		1.756	-0.655079
1.76	0.662559		1.76	-0.646489
1.764	0.665856		1.764	-0.642079
1.768	0.66377		1.768	-0.651242
1.772	0.65835		1.772	-0.647514
1.776	0.661193		1.776	-0.655878
1.78	0.65963		1.78	-0.658214
1.784	0.651762		1.784	-0.653981
1.788	0.66055		1.788	-0.623677
1.792	0.654689		1.792	-0.654845
1.796	0.64866		1.796	-0.639485
1.8	0.649658		1.8	-0.626568
1.804	0.648163		1.804	-0.644145
1.808	0.64667		1.808	-0.656175
1.812	0.650737		1.812	-0.646637
1.816	0.642058		1.816	-0.633901
1.82	0.6466		1.82	-0.640365
1.824	0.6387		1.824	-0.647699
1.828	0.635711		1.828	-0.646886
1.832	0.64201		1.832	-0.646268
1.836	0.643032		1.836	-0.659526
1.84	0.642853		1.84	-0.657422
1.844	0.643764		1.844	-0.649123
1.848	0.646537		1.848	-0.6352
1.852	0.639522		1.852	-0.641307
1.856	0.641873		1.856	-0.655623
1.86	0.642592		1.86	-0.661596
1.864	0.647373		1.864	-0.674892
1.868	0.641768		1.868	-0.664467
1.872	0.646941		1.872	-0.650703
1.876	0.646088		1.876	-0.649199
1.88	0.649094		1.88	-0.640083
1.884	0.654405		1.884	-0.656561
1.888	0.652964		1.888	-0.649934
1.892	0.651911		1.892	-0.665343
1.896	0.660767		1.896	-0.664534
1.9	0.652451		1.9	-0.650853
1.904	0.657627		1.904	-0.651391
1.908	0.654002		1.908	-0.655523
1.912	0.659576		1.912	-0.632908
1.916	0.661992		1.916	-0.653884
1.92	0.6688		1.92	-0.655163
1.924	0.66566		1.924	-0.652627
1.928	0.657457		1.928	-0.663642
1.932	0.665699		1.932	-0.65185
1.936	0.666015		1.936	-0.656939
1.94	0.669241		1.94	-0.660312
1.944	0.661332		1.944	-0.647121
1.948	0.660306		1.948	-0.654383
1.952	0.658462		1.952	-0.66274
1.956	0.661624		1.956	-0.654342
1.96	0.660016		1.96	-0.67028
1.964	0.647837		1.964	-0.650869
1.968	0.660645		1.968	-0.666999
1.972	0.652864		1.972	-0.657672
1.976	0.653881		1.976	-0.675929
1.98	0.648661		1.98	-0.640489
1.984	0.648617		1.984	-0.65177
1.988	0.649596		1.988	-0.63732
1.992	0.647206		1.992	-0.660504
1.996	0.654924		1.996	-0.639508
2	0.641317		2	-0.656213

## Sheet: Fig 3c
WT 460-490			WT 600-650			WDF 460-490			WDF 600-650
0.00162031	-5.4946		0.00303455	2.87056		0.0052257	-5.89559		0.00429688	3.28384
0.00228869	-5.39994		0.00386688	2.74629		0.0062622	-5.88859		0.0052257	3.36039
0.00303455	-5.71164		0.0047957	2.76866		0.00741885	-5.60353		0.0062622	3.09167
0.00386688	-5.01546		0.0058322	2.95616		0.00870959	-5.77846		0.00741885	3.25274
0.0047957	-5.37244		0.00698885	2.88268		0.01015	-5.32898		0.00870959	3.07077
0.0058322	-4.81328		0.00827959	2.76486		0.0117573	-5.75632		0.01015	3.06318
0.00698885	-4.54011		0.00971996	3.00657		0.013551	-5.4439		0.0117573	3.11184
0.00827959	-4.52302		0.0113273	2.8917		0.0155526	-5.44814		0.013551	3.02378
0.00971996	-4.64853		0.013121	2.72073		0.0177863	-5.40442		0.0155526	3.22597
0.0113273	-4.05306		0.0151226	2.39818		0.0202789	-5.32317		0.0177863	3.04307
0.013121	-4.24777		0.0173563	2.57174		0.0230605	-5.47739		0.0202789	2.84168
0.0151226	-4.08744		0.0198489	2.59585		0.0261645	-5.3907		0.0230605	2.74873
0.0173563	-4.76957		0.0226305	2.54708		0.0296284	-5.49345		0.0261645	2.86097
0.0198489	-4.24505		0.0257345	2.1281		0.0334938	-4.86888		0.0296284	2.9337
0.0226305	-4.7664		0.0291984	2.25812		0.0378073	-4.88551		0.0334938	2.64262
0.0257345	-4.52339		0.0330638	2.16724		0.0426209	-5.08521		0.0378073	2.74427
0.0291984	-3.85338		0.0373773	2.02143		0.0479925	-4.91162		0.0426209	2.69021
0.0330638	-3.8597		0.0421909	2.34939		0.0539868	-5.08007		0.0479925	2.7545
0.0373773	-4.64968		0.0475625	2.28851		0.0606761	-4.79853		0.0539868	2.53551
0.0421909	-4.31655		0.0535568	2.01591		0.0681408	-4.45467		0.0606761	2.43213
0.0475625	-3.95959		0.0602461	2.14495		0.0764708	-4.4974		0.0681408	2.44785
0.0535568	-4.39565		0.0677108	2.24311		0.0857666	-4.77028		0.0764708	2.51684
0.0602461	-4.25233		0.0760408	1.98895		0.0961399	-4.4768		0.0857666	2.48183
0.0677108	-4.41293		0.0853366	1.93651		0.107716	-4.68701		0.0961399	2.1047
0.0760408	-4.13347		0.0957099	1.52147		0.120634	-3.80096		0.107716	2.14645
0.0853366	-3.58134		0.107286	1.95767		0.135049	-4.45019		0.120634	2.16488
0.0957099	-3.87082		0.120204	1.55402		0.151136	-3.91873		0.135049	2.32686
0.107286	-3.58927		0.134619	1.70583		0.169087	-3.9016		0.151136	2.18236
0.120204	-4.28108		0.150706	1.95803		0.18912	-3.98231		0.169087	1.94214
0.134619	-3.60346		0.168657	1.60858		0.211474	-3.88657		0.18912	2.00063
0.150706	-3.50508		0.18869	-0.669924		0.236421	-3.7989		0.211474	1.70328
0.168657	-3.77592		0.211044	1.17258		0.264259	-3.58644		0.236421	2.00895
0.18869	-2.49419		0.235991	1.37579		0.295324	-3.66026		0.264259	1.50428
0.211044	-3.565		0.263829	1.41816		0.329991	-3.21609		0.295324	1.65179
0.235991	-3.4672		0.294894	1.45509		0.368677	-3.16233		0.329991	1.65696
0.263829	-3.46419		0.329561	1.1726		0.411847	-3.36069		0.368677	1.58244
0.294894	-3.3374		0.368247	0.946495		0.460022	-3.17439		0.411847	1.63386
0.329561	-2.73978		0.411417	1.26076		0.513782	-3.02159		0.460022	1.20638
0.368247	-2.7847		0.459592	1.03719		0.573774	-2.91312		0.513782	1.12096
0.411417	-2.8866		0.513352	1.20411		0.64072	-2.47233		0.573774	1.21151
0.459592	-2.8556		0.573344	1.2172		0.715428	-2.86064		0.64072	1.27513
0.513352	-3.10506		0.64029	1.18999		0.798796	-2.56656		0.715428	1.27007
0.573344	-2.82644		0.714998	0.740618		0.891829	-2.52811		0.798796	0.893227
0.64029	-2.87396		0.798366	1.07744		0.995646	-2.43999		0.891829	0.7878
0.714998	-3.01686		0.891399	0.862818					0.995646	0.791152
0.798366	-2.31954		0.995216	1.06679
0.891399	-2.03908
0.995216	-2.27977
