# Supplementary material for: Magnetic sensitivity of cryptochrome 4 from a migratory songbird
Source: Springer Nature journal article supplement (doi:10.1038/s41586-021-03618-9), 2021-06-23
Supplement: MOESM6 [file 41586_2021_3618_MOESM6_ESM.xlsx]

## Sheet: Fig4b
4	4	-0.000259923
4.1	4	-0.000283973
4.2	4	-0.000306055
4.3	4	-0.000326167
4.4	4	-0.000344471
4.5	4	-0.00036124
4.6	4	-0.000376807
4.7	4	-0.000391524
4.8	4	-0.000405716
4.9	4	-0.00041965
5	4	-0.000433492
5.1	4	-0.000447272
5.2	4	-0.000460852
5.3	4	-0.000473897
5.4	4	-0.000485867
5.5	4	-0.000496019
5.6	4	-0.000503453
5.7	4	-0.000507177
5.8	4	-0.000506208
5.9	4	-0.000499692
6	4	-0.000487032
6.1	4	-0.000468009
6.2	4	-0.000442858
6.3	4	-0.000412296
6.4	4	-0.000377476
6.5	4	-0.000339862
6.6	4	-0.00030107
6.7	4	-0.00026267
6.8	4	-0.000226027
6.9	4	-0.000192184
7	4	-0.000161808
7.1	4	-0.000135201
7.2	4	-0.000112337
7.3	4	-9.29174e-05
7.4	4	-7.64576e-05
7.5	4	-6.24049e-05
7.6	4	-5.02695e-05
7.7	4	-3.97182e-05
7.8	4	-3.05944e-05
7.9	4	-2.28654e-05
8	4	-1.6528e-05
8.1	4	-1.1528e-05
8.2	4	-7.73764e-06
8.3	4	-4.98147e-06
8.4	4	-3.06826e-06
8.5	4	-1.80789e-06
8.6	4	-1.02227e-06
8.7	4	-5.57902e-07
8.8	4	-2.95825e-07
8.9	4	-1.53317e-07
9	4	-7.79932e-08
4	4.1	-0.000296254
4.1	4.1	-0.000329181
4.2	4.1	-0.000359994
4.3	4.1	-0.000388445
4.4	4.1	-0.000414545
4.5	4.1	-0.000438508
4.6	4.1	-0.000460677
4.7	4.1	-0.000481461
4.8	4.1	-0.000501269
4.9	4.1	-0.000520454
5	4.1	-0.000539254
5.1	4.1	-0.000557741
5.2	4.1	-0.000575777
5.3	4.1	-0.000592974
5.4	4.1	-0.000608677
5.5	4.1	-0.000621982
5.6	4.1	-0.000631775
5.7	4.1	-0.000636825
5.8	4.1	-0.000635908
5.9	4.1	-0.000627959
6	4.1	-0.000612237
6.1	4.1	-0.000588469
6.2	4.1	-0.000556958
6.3	4.1	-0.00051861
6.4	4.1	-0.000474878
6.5	4.1	-0.00042761
6.6	4.1	-0.000378839
6.7	4.1	-0.000330548
6.8	4.1	-0.000284457
6.9	4.1	-0.000241879
7	4.1	-0.000203658
7.1	4.1	-0.000170177
7.2	4.1	-0.000141403
7.3	4.1	-0.000116962
7.4	4.1	-9.62445e-05
7.5	4.1	-7.85562e-05
7.6	4.1	-6.32809e-05
7.7	4.1	-4.99991e-05
7.8	4.1	-3.8514e-05
7.9	4.1	-2.87845e-05
8	4.1	-2.08067e-05
8.1	4.1	-1.45124e-05
8.2	4.1	-9.74082e-06
8.3	4.1	-6.27114e-06
8.4	4.1	-3.86263e-06
8.5	4.1	-2.27596e-06
8.6	4.1	-1.28695e-06
8.7	4.1	-7.02348e-07
8.8	4.1	-3.72418e-07
8.9	4.1	-1.93013e-07
9	4.1	-9.81869e-08
4	4.2	-0.000331356
4.1	4.2	-0.000375324
4.2	4.2	-0.000417439
4.3	4.2	-0.000457039
4.4	4.2	-0.000493829
4.5	4.2	-0.000527835
4.6	4.2	-0.000559327
4.7	4.2	-0.000588722
4.8	4.2	-0.000616497
4.9	4.2	-0.00064309
5	4.2	-0.000668826
5.1	4.2	-0.000693833
5.2	4.2	-0.00071798
5.3	4.2	-0.000740822
5.4	4.2	-0.000761578
5.5	4.2	-0.000779144
5.6	4.2	-0.000792151
5.7	4.2	-0.000799075
5.8	4.2	-0.000798397
5.9	4.2	-0.000788791
6	4.2	-0.000769337
6.1	4.2	-0.000739701
6.2	4.2	-0.000700271
6.3	4.2	-0.000652195
6.4	4.2	-0.000597304
6.5	4.2	-0.00053793
6.6	4.2	-0.000476637
6.7	4.2	-0.000415924
6.8	4.2	-0.00035796
6.9	4.2	-0.000304403
7	4.2	-0.000256319
7.1	4.2	-0.000214191
7.2	4.2	-0.000177982
7.3	4.2	-0.000147223
7.4	4.2	-0.000121149
7.5	4.2	-9.88856e-05
7.6	4.2	-7.96585e-05
7.7	4.2	-6.29401e-05
7.8	4.2	-4.84829e-05
7.9	4.2	-3.62353e-05
8	4.2	-2.61927e-05
8.1	4.2	-1.82693e-05
8.2	4.2	-1.22625e-05
8.3	4.2	-7.89464e-06
8.4	4.2	-4.86263e-06
8.5	4.2	-2.8652e-06
8.6	4.2	-1.62014e-06
8.7	4.2	-8.8419e-07
8.8	4.2	-4.6884e-07
8.9	4.2	-2.42987e-07
9	4.2	-1.23609e-07
4	4.3	-0.000362931
4.1	4.3	-0.000419983
4.2	4.3	-0.000476151
4.3	4.3	-0.000530172
4.4	4.3	-0.000581232
4.5	4.3	-0.000628976
4.6	4.3	-0.00067344
4.7	4.3	-0.000714945
4.8	4.3	-0.000753967
4.9	4.3	-0.000791012
5	4.3	-0.000826483
5.1	4.3	-0.000860574
5.2	4.3	-0.000893163
5.3	4.3	-0.000923748
5.4	4.3	-0.000951401
5.5	4.3	-0.000974783
5.6	4.3	-0.000992215
5.7	4.3	-0.00100182
5.8	4.3	-0.00100171
5.9	4.3	-0.000990247
6	4.3	-0.000966289
6.1	4.3	-0.000929431
6.2	4.3	-0.000880171
6.3	4.3	-0.000819963
6.4	4.3	-0.00075112
6.5	4.3	-0.000676583
6.6	4.3	-0.000599586
6.7	4.3	-0.000523282
6.8	4.3	-0.000450407
6.9	4.3	-0.000383054
7	4.3	-0.000322571
7.1	4.3	-0.000269572
7.2	4.3	-0.000224012
7.3	4.3	-0.000185306
7.4	4.3	-0.000152493
7.5	4.3	-0.000124473
7.6	4.3	-0.000100272
7.7	4.3	-7.9229e-05
7.8	4.3	-6.10311e-05
7.9	4.3	-4.56142e-05
8	4.3	-3.29726e-05
8.1	4.3	-2.29984e-05
8.2	4.3	-1.54368e-05
8.3	4.3	-9.93836e-06
8.4	4.3	-6.12149e-06
8.5	4.3	-3.60697e-06
8.6	4.3	-2.03959e-06
8.7	4.3	-1.11311e-06
8.8	4.3	-5.90226e-07
8.9	4.3	-3.05899e-07
9	4.3	-1.55613e-07
4	4.4	-0.00038856
4.1	4.4	-0.000460267
4.2	4.4	-0.000533091
4.3	4.4	-0.000605032
4.4	4.4	-0.00067453
4.5	4.4	-0.000740581
4.6	4.4	-0.000802743
4.7	4.4	-0.000861039
4.8	4.4	-0.000915811
4.9	4.4	-0.000967544
5	4.4	-0.00101668
5.1	4.4	-0.00106347
5.2	4.4	-0.00110779
5.3	4.4	-0.00114908
5.4	4.4	-0.00118622
5.5	4.4	-0.00121761
5.6	4.4	-0.0012412
5.7	4.4	-0.00125467
5.8	4.4	-0.0012557
5.9	4.4	-0.00124226
6	4.4	-0.00121294
6.1	4.4	-0.00116724
6.2	4.4	-0.00110583
6.3	4.4	-0.00103053
6.4	4.4	-0.000944273
6.5	4.4	-0.00085077
6.6	4.4	-0.0007541
6.7	4.4	-0.000658243
6.8	4.4	-0.000566653
6.9	4.4	-0.000481974
7	4.4	-0.000405912
7.1	4.4	-0.000339247
7.2	4.4	-0.00028193
7.3	4.4	-0.000233229
7.4	4.4	-0.000191937
7.5	4.4	-0.000156674
7.6	4.4	-0.000126217
7.7	4.4	-9.97308e-05
7.8	4.4	-7.68252e-05
7.9	4.4	-5.74194e-05
8	4.4	-4.15066e-05
8.1	4.4	-2.89512e-05
8.2	4.4	-1.94327e-05
8.3	4.4	-1.2511e-05
8.4	4.4	-7.70617e-06
8.5	4.4	-4.54075e-06
8.6	4.4	-2.56761e-06
8.7	4.4	-1.40129e-06
8.8	4.4	-7.43035e-07
8.9	4.4	-3.85097e-07
9	4.4	-1.95903e-07
4	4.5	-0.00040607
4.1	4.5	-0.000493129
4.2	4.5	-0.000584617
4.3	4.5	-0.000677801
4.4	4.5	-0.0007702
4.5	4.5	-0.000859876
4.6	4.5	-0.000945575
4.7	4.5	-0.00102671
4.8	4.5	-0.00110325
4.9	4.5	-0.00117546
5	4.5	-0.00124373
5.1	4.5	-0.00130827
5.2	4.5	-0.00136896
5.3	4.5	-0.00142512
5.4	4.5	-0.00147542
5.5	4.5	-0.00151794
5.6	4.5	-0.00155016
5.7	4.5	-0.00156927
5.8	4.5	-0.00157238
5.9	4.5	-0.001557
6	4.5	-0.0015214
6.1	4.5	-0.00146499
6.2	4.5	-0.00138862
6.3	4.5	-0.00129461
6.4	4.5	-0.00118667
6.5	4.5	-0.00106948
6.6	4.5	-0.000948194
6.7	4.5	-0.000827839
6.8	4.5	-0.000712778
6.9	4.5	-0.000606353
7	4.5	-0.000510726
7.1	4.5	-0.00042689
7.2	4.5	-0.000354795
7.3	4.5	-0.000293527
7.4	4.5	-0.000241572
7.5	4.5	-0.000197198
7.6	4.5	-0.000158868
7.7	4.5	-0.000125534
7.8	4.5	-9.67039e-05
7.9	4.5	-7.22782e-05
8	4.5	-5.22484e-05
8.1	4.5	-3.64442e-05
8.2	4.5	-2.44625e-05
8.3	4.5	-1.57494e-05
8.4	4.5	-9.70097e-06
8.5	4.5	-5.71621e-06
8.6	4.5	-3.23231e-06
8.7	4.5	-1.76406e-06
8.8	4.5	-9.35403e-07
8.9	4.5	-4.84799e-07
9	4.5	-2.46623e-07
4	4.6	-0.000413916
4.1	4.6	-0.000515825
4.2	4.6	-0.000626892
4.3	4.6	-0.000743896
4.4	4.6	-0.000863441
4.5	4.6	-0.000982441
4.6	4.6	-0.00109847
4.7	4.6	-0.00120992
4.8	4.6	-0.00131597
4.9	4.6	-0.00141638
5	4.6	-0.00151122
5.1	4.6	-0.00160054
5.2	4.6	-0.00168407
5.3	4.6	-0.00176096
5.4	4.6	-0.00182962
5.5	4.6	-0.0018877
5.6	4.6	-0.00193214
5.7	4.6	-0.0019595
5.8	4.6	-0.00196623
5.9	4.6	-0.00194928
6	4.6	-0.00190652
6.1	4.6	-0.00183726
6.2	4.6	-0.00174258
6.3	4.6	-0.00162547
6.4	4.6	-0.0014906
6.5	4.6	-0.0013439
6.6	4.6	-0.00119187
6.7	4.6	-0.00104086
6.8	4.6	-0.000896392
6.9	4.6	-0.000762695
7	4.6	-0.000642511
7.1	4.6	-0.000537111
7.2	4.6	-0.000446448
7.3	4.6	-0.000369383
7.4	4.6	-0.000304022
7.5	4.6	-0.00024819
7.6	4.6	-0.000199956
7.7	4.6	-0.000158006
7.8	4.6	-0.000121722
7.9	4.6	-9.09792e-05
8	4.6	-6.57684e-05
8.1	4.6	-4.58755e-05
8.2	4.6	-3.07935e-05
8.3	4.6	-1.98258e-05
8.4	4.6	-1.2212e-05
8.5	4.6	-7.19587e-06
8.6	4.6	-4.06905e-06
8.7	4.6	-2.22074e-06
8.8	4.6	-1.17757e-06
8.9	4.6	-6.10311e-07
9	4.6	-3.10473e-07
4	4.7	-0.000411484
4.1	4.7	-0.000526395
4.2	4.7	-0.000656447
4.3	4.7	-0.000798472
4.4	4.7	-0.000948475
4.5	4.7	-0.00110223
4.6	4.7	-0.00125588
4.7	4.7	-0.00140633
4.8	4.7	-0.00155146
4.9	4.7	-0.00169
5	4.7	-0.00182131
5.1	4.7	-0.00194493
5.2	4.7	-0.00206025
5.3	4.7	-0.00216608
5.4	4.7	-0.00226042
5.5	4.7	-0.00234038
5.6	4.7	-0.00240222
5.7	4.7	-0.00244172
5.8	4.7	-0.00245456
5.9	4.7	-0.00243695
6	4.7	-0.00238632
6.1	4.7	-0.00230185
6.2	4.7	-0.00218498
6.3	4.7	-0.00203949
6.4	4.7	-0.00187131
6.5	4.7	-0.00168793
6.6	4.7	-0.00149757
6.7	4.7	-0.00130827
6.8	4.7	-0.001127
6.9	4.7	-0.000959134
7	4.7	-0.000808153
7.1	4.7	-0.00067569
7.2	4.7	-0.000561709
7.3	4.7	-0.000464797
7.4	4.7	-0.000382584
7.5	4.7	-0.000312345
7.6	4.7	-0.000251656
7.7	4.7	-0.000198867
7.8	4.7	-0.000153205
7.9	4.7	-0.000114514
8	4.7	-8.2784e-05
8.1	4.7	-5.77458e-05
8.2	4.7	-3.87621e-05
8.3	4.7	-2.49567e-05
8.4	4.7	-1.53727e-05
8.5	4.7	-9.05843e-06
8.6	4.7	-5.12233e-06
8.7	4.7	-2.79561e-06
8.8	4.7	-1.48241e-06
8.9	4.7	-7.68311e-07
9	4.7	-3.90853e-07
4	4.8	-0.000399209
4.1	4.8	-0.000524046
4.2	4.8	-0.00067079
4.3	4.8	-0.000837139
4.4	4.8	-0.00101919
4.5	4.8	-0.00121197
4.6	4.8	-0.00141019
4.7	4.8	-0.00160897
4.8	4.8	-0.00180429
4.9	4.8	-0.00199321
5	4.8	-0.00217369
5.1	4.8	-0.00234427
5.2	4.8	-0.00250354
5.3	4.8	-0.00264963
5.4	4.8	-0.0027799
5.5	4.8	-0.0028907
5.6	4.8	-0.00297741
5.7	4.8	-0.00303483
5.8	4.8	-0.00305765
5.9	4.8	-0.00304125
6	4.8	-0.00298247
6.1	4.8	-0.0028804
6.2	4.8	-0.00273689
6.3	4.8	-0.00255678
6.4	4.8	-0.00234757
6.5	4.8	-0.00211876
6.6	4.8	-0.00188074
6.7	4.8	-0.00164369
6.8	4.8	-0.00141645
6.9	4.8	-0.00120583
7	4.8	-0.00101627
7.1	4.8	-0.000849864
7.2	4.8	-0.000706618
7.3	4.8	-0.000584781
7.4	4.8	-0.000481396
7.5	4.8	-0.000393048
7.6	4.8	-0.000316699
7.7	4.8	-0.00025028
7.8	4.8	-0.000192821
7.9	4.8	-0.000144131
8	4.8	-0.000104198
8.1	4.8	-7.26849e-05
8.2	4.8	-4.87913e-05
8.3	4.8	-3.14146e-05
8.4	4.8	-1.9351e-05
8.5	4.8	-1.14029e-05
8.6	4.8	-6.44816e-06
8.7	4.8	-3.51925e-06
8.8	4.8	-1.86615e-06
8.9	4.8	-9.67208e-07
9	4.8	-4.92039e-07
4	4.9	-0.000378474
4.1	4.9	-0.000509295
4.2	4.9	-0.000668883
4.3	4.9	-0.000856717
4.4	4.9	-0.00107
4.5	4.9	-0.0013039
4.6	4.9	-0.0015522
4.7	4.9	-0.00180823
4.8	4.9	-0.00206567
4.9	4.9	-0.00231916
5	4.9	-0.00256447
5.1	4.9	-0.00279823
5.2	4.9	-0.00301754
5.3	4.9	-0.00321927
5.4	4.9	-0.00339966
5.5	4.9	-0.0035539
5.6	4.9	-0.00367618
5.7	4.9	-0.00376003
5.8	4.9	-0.00379888
5.9	4.9	-0.00378706
6	4.9	-0.00372073
6.1	4.9	-0.00359882
6.2	4.9	-0.0034238
6.3	4.9	-0.00320181
6.4	4.9	-0.00294239
6.5	4.9	-0.00265755
6.6	4.9	-0.00236048
6.7	4.9	-0.00206405
6.8	4.9	-0.00177948
6.9	4.9	-0.00151544
7	4.9	-0.0012776
7.1	4.9	-0.00106868
7.2	4.9	-0.000888737
7.3	4.9	-0.000735621
7.4	4.9	-0.000605647
7.5	4.9	-0.000494547
7.6	4.9	-0.000398515
7.7	4.9	-0.000314957
7.8	4.9	-0.000242664
7.9	4.9	-0.000181396
8	4.9	-0.000131143
8.1	4.9	-9.14846e-05
8.2	4.9	-6.1413e-05
8.3	4.9	-3.95423e-05
8.4	4.9	-2.43581e-05
8.5	4.9	-1.43537e-05
8.6	4.9	-8.11699e-06
8.7	4.9	-4.43013e-06
8.8	4.9	-2.3492e-06
8.9	4.9	-1.21758e-06
9	4.9	-6.19415e-07
4	5	-0.000351313
4.1	5	-0.000483845
4.2	5	-0.00065133
4.3	5	-0.000855839
4.4	5	-0.00109685
4.5	5	-0.00137093
4.6	5	-0.00167208
4.7	5	-0.00199244
4.8	5	-0.00232343
4.9	5	-0.00265675
5	5	-0.00298501
5.1	5	-0.00330188
5.2	5	-0.00360184
5.3	5	-0.00387957
5.4	5	-0.00412933
5.5	5	-0.00434452
5.6	5	-0.00451757
5.7	5	-0.00464024
5.8	5	-0.00470437
5.9	5	-0.0047029
6	5	-0.00463112
6.1	5	-0.00448784
6.2	5	-0.00427625
6.3	5	-0.00400419
6.4	5	-0.00368378
6.5	5	-0.00333023
6.6	5	-0.00296027
6.7	5	-0.00259023
6.8	5	-0.00223436
6.9	5	-0.00190371
7	5	-0.00160556
7.1	5	-0.00134344
7.2	5	-0.00111752
7.3	5	-0.000925182
7.4	5	-0.000761841
7.5	5	-0.00062217
7.6	5	-0.000501407
7.7	5	-0.000396308
7.8	5	-0.000305363
7.9	5	-0.000228278
8	5	-0.000165046
8.1	5	-0.00011514
8.2	5	-7.72961e-05
8.3	5	-4.97708e-05
8.4	5	-3.06599e-05
8.5	5	-1.80677e-05
8.6	5	-1.02175e-05
8.7	5	-5.57667e-06
8.8	5	-2.95723e-06
8.9	5	-1.53275e-06
9	5	-7.79757e-07
4	5.1	-0.000320036
4.1	5.1	-0.00045022
4.2	5.1	-0.000620218
4.3	5.1	-0.000835186
4.4	5.1	-0.0010979
4.5	5.1	-0.00140783
4.6	5.1	-0.00176076
4.7	5.1	-0.00214908
4.8	5.1	-0.00256274
4.9	5.1	-0.00299051
5	5.1	-0.00342117
5.1	5.1	-0.00384422
5.2	5.1	-0.00425012
5.3	5.1	-0.00462988
5.4	5.1	-0.0049745
5.5	5.1	-0.00527448
5.6	5.1	-0.00551953
5.7	5.1	-0.0056989
5.8	5.1	-0.00580218
5.9	5.1	-0.00582048
6	5.1	-0.00574793
6.1	5.1	-0.00558316
6.2	5.1	-0.00533026
6.3	5.1	-0.00499925
6.4	5.1	-0.00460548
6.5	5.1	-0.00416827
6.6	5.1	-0.00370883
6.7	5.1	-0.00324789
6.8	5.1	-0.00280362
6.9	5.1	-0.00239014
7	5.1	-0.00201678
7.1	5.1	-0.00168821
7.2	5.1	-0.00140477
7.3	5.1	-0.0011633
7.4	5.1	-0.000958114
7.5	5.1	-0.000782587
7.6	5.1	-0.000630768
7.7	5.1	-0.000498607
7.8	5.1	-0.000384219
7.9	5.1	-0.00028725
8	5.1	-0.000207696
8.1	5.1	-0.000144902
8.2	5.1	-9.7281e-05
8.3	5.1	-6.26419e-05
8.4	5.1	-3.85903e-05
8.5	5.1	-2.27419e-05
8.6	5.1	-1.28612e-05
8.7	5.1	-7.01976e-06
8.8	5.1	-3.72257e-06
8.9	5.1	-1.92946e-06
9	5.1	-9.81593e-07
4	5.2	-0.00028687
4.1	5.2	-0.000411291
4.2	5.2	-0.000578662
4.3	5.2	-0.000797291
4.4	5.2	-0.00107389
4.5	5.2	-0.00141212
4.6	5.2	-0.00181144
4.7	5.2	-0.00226654
4.8	5.2	-0.00276762
4.9	5.2	-0.00330153
5	5.2	-0.00385322
5.1	5.2	-0.00440717
5.2	5.2	-0.00494824
5.3	5.2	-0.0054619
5.4	5.2	-0.00593402
5.5	5.2	-0.00635039
5.6	5.2	-0.00669651
5.7	5.2	-0.00695785
5.8	5.2	-0.0071207
5.9	5.2	-0.00717359
6	5.2	-0.00710904
6.1	5.2	-0.00692528
6.2	5.2	-0.00662755
6.3	5.2	-0.00622853
6.4	5.2	-0.00574769
6.5	5.2	-0.00520953
6.6	5.2	-0.00464096
6.7	5.2	-0.00406838
6.8	5.2	-0.00351495
6.9	5.2	-0.00299876
7	5.2	-0.00253188
7.1	5.2	-0.00212045
7.2	5.2	-0.00176517
7.3	5.2	-0.00146223
7.4	5.2	-0.00120463
7.5	5.2	-0.000984145
7.6	5.2	-0.000793354
7.7	5.2	-0.000627208
7.8	5.2	-0.00048337
7.9	5.2	-0.000361411
8	5.2	-0.00026134
8.1	5.2	-0.000182341
8.2	5.2	-0.000122423
8.3	5.2	-7.88363e-05
8.4	5.2	-4.85692e-05
8.5	5.2	-2.86239e-05
8.6	5.2	-1.61882e-05
8.7	5.2	-8.83601e-06
8.8	5.2	-4.68586e-06
8.9	5.2	-2.4288e-06
9	5.2	-1.23565e-06
4	5.3	-0.000253698
4.1	5.3	-0.00036983
4.2	5.3	-0.000530221
4.3	5.3	-0.000745986
4.4	5.3	-0.00102786
4.5	5.3	-0.00138454
4.6	5.3	-0.00182079
4.7	5.3	-0.00233594
4.8	5.3	-0.00292306
4.9	5.3	-0.00356927
5	5.3	-0.00425692
5.1	5.3	-0.00496544
5.2	5.3	-0.00567292
5.3	5.3	-0.0063573
5.4	5.3	-0.00699681
5.5	5.3	-0.00757005
5.6	5.3	-0.00805594
5.7	5.3	-0.00843412
5.8	5.3	-0.00868592
5.9	5.3	-0.00879601
6	5.3	-0.00875444
6.1	5.3	-0.00855868
6.2	5.3	-0.00821519
6.3	5.3	-0.00773993
6.4	5.3	-0.0071575
6.5	5.3	-0.00649896
6.6	5.3	-0.00579847
6.7	5.3	-0.00508965
6.8	5.3	-0.00440211
6.9	5.3	-0.00375908
7	5.3	-0.00317627
7.1	5.3	-0.00266181
7.2	5.3	-0.00221696
7.3	5.3	-0.00183724
7.4	5.3	-0.00151407
7.5	5.3	-0.00123727
7.6	5.3	-0.000997607
7.7	5.3	-0.000788817
7.8	5.3	-0.000608
7.9	5.3	-0.000454649
8	5.3	-0.000328795
8.1	5.3	-0.000229426
8.2	5.3	-0.000154049
8.3	5.3	-9.92092e-05
8.4	5.3	-6.11243e-05
8.5	5.3	-3.60252e-05
8.6	5.3	-2.0375e-05
8.7	5.3	-1.11217e-05
8.8	5.3	-5.89822e-06
8.9	5.3	-3.05729e-06
9	5.3	-1.55544e-06
4	5.4	-0.000221932
4.1	5.4	-0.000328186
4.2	5.4	-0.000478337
4.3	5.4	-0.000685666
4.4	5.4	-0.000964512
4.5	5.4	-0.00132871
4.6	5.4	-0.00178941
4.7	5.4	-0.0023527
4.8	5.4	-0.00301746
4.9	5.4	-0.00377433
5	5.4	-0.00460584
5.1	5.4	-0.00548783
5.2	5.4	-0.00639159
5.3	5.4	-0.00728595
5.4	5.4	-0.00813887
5.5	5.4	-0.0089185
5.6	5.4	-0.00959383
5.7	5.4	-0.0101356
5.8	5.4	-0.0105174
5.9	5.4	-0.010718
6	5.4	-0.0107235
6.1	5.4	-0.0105298
6.2	5.4	-0.0101444
6.3	5.4	-0.00958713
6.4	5.4	-0.00888894
6.5	5.4	-0.00808905
6.6	5.4	-0.00723085
6.7	5.4	-0.00635715
6.8	5.4	-0.00550589
6.9	5.4	-0.00470704
7	5.4	-0.00398107
7.1	5.4	-0.0033389
7.2	5.4	-0.00278269
7.3	5.4	-0.00230726
7.4	5.4	-0.00190221
7.5	5.4	-0.00155494
7.6	5.4	-0.00125407
7.7	5.4	-0.000991809
7.8	5.4	-0.000764593
7.9	5.4	-0.000571829
8	5.4	-0.000413592
8.1	5.4	-0.000288629
8.2	5.4	-0.000193821
8.3	5.4	-0.000124834
8.4	5.4	-7.69182e-05
8.5	5.4	-4.53369e-05
8.6	5.4	-2.56431e-05
8.7	5.4	-1.39981e-05
8.8	5.4	-7.42396e-06
8.9	5.4	-3.84829e-06
9	5.4	-1.95793e-06
4	5.5	-0.000192491
4.1	5.5	-0.000288123
4.2	5.5	-0.000425941
4.3	5.5	-0.000620606
4.4	5.5	-0.000889252
4.5	5.5	-0.00125034
4.6	5.5	-0.00172159
4.7	5.5	-0.00231717
4.8	5.5	-0.00304449
4.9	5.5	-0.00390144
5	5.5	-0.00487477
5.1	5.5	-0.0059402
5.2	5.5	-0.00706402
5.3	5.5	-0.00820578
5.4	5.5	-0.00932107
5.5	5.5	-0.0103641
5.6	5.5	-0.0112897
5.7	5.5	-0.0120551
5.8	5.5	-0.0126225
5.9	5.5	-0.0129612
6	5.5	-0.0130506
6.1	5.5	-0.0128835
6.2	5.5	-0.012468
6.3	5.5	-0.011828
6.4	5.5	-0.0110022
6.5	5.5	-0.0100397
6.6	5.5	-0.00899567
6.7	5.5	-0.00792457
6.8	5.5	-0.0068751
6.9	5.5	-0.00588602
7	5.5	-0.00498419
7.1	5.5	-0.00418435
7.2	5.5	-0.00349013
7.3	5.5	-0.00289571
7.4	5.5	-0.00238857
7.5	5.5	-0.00195331
7.6	5.5	-0.00157587
7.7	5.5	-0.00124663
7.8	5.5	-0.000961247
7.9	5.5	-0.000719037
8	5.5	-0.000520149
8.1	5.5	-0.000363044
8.2	5.5	-0.000243823
8.3	5.5	-0.000157057
8.4	5.5	-9.67824e-05
8.5	5.5	-5.70502e-05
8.6	5.5	-3.22708e-05
8.7	5.5	-1.76172e-05
8.8	5.5	-9.34391e-06
8.9	5.5	-4.84374e-06
9	5.5	-2.46448e-06
4	5.6	-0.000165867
4.1	5.6	-0.000250802
4.2	5.6	-0.000375246
4.3	5.6	-0.000554461
4.4	5.6	-0.000807388
4.5	5.6	-0.00115609
4.6	5.6	-0.00162423
4.7	5.6	-0.00223433
4.8	5.6	-0.00300403
4.9	5.6	-0.00394187
5	5.6	-0.00504358
5.1	5.6	-0.00628979
5.2	5.6	-0.00764606
5.3	5.6	-0.00906482
5.4	5.6	-0.010489
5.5	5.6	-0.0118559
5.6	5.6	-0.0131017
5.7	5.6	-0.0141647
5.8	5.6	-0.0149897
5.9	5.6	-0.0155314
6	5.6	-0.0157585
6.1	5.6	-0.0156578
6.2	5.6	-0.0152361
6.3	5.6	-0.0145216
6.4	5.6	-0.0135615
6.5	5.6	-0.0124172
6.6	5.6	-0.0111583
6.7	5.6	-0.00985414
6.8	5.6	-0.00856721
6.9	5.6	-0.00734781
7	5.6	-0.00623131
7.1	5.6	-0.00523782
7.2	5.6	-0.00437323
7.3	5.6	-0.00363136
7.4	5.6	-0.00299732
7.5	5.6	-0.00245238
7.6	5.6	-0.00197929
7.7	5.6	-0.00156629
7.8	5.6	-0.00120805
7.9	5.6	-0.000903865
8	5.6	-0.000653987
8.1	5.6	-0.000456541
8.2	5.6	-0.000306666
8.3	5.6	-0.000197564
8.4	5.6	-0.00012176
8.5	5.6	-7.17815e-05
8.6	5.6	-4.06075e-05
8.7	5.6	-2.21702e-05
8.8	5.6	-1.17596e-05
8.9	5.6	-6.09638e-06
9	5.6	-3.10197e-06
4	5.7	-0.000142219
4.1	5.7	-0.000216856
4.2	5.7	-0.000327726
4.3	5.7	-0.000490024
4.4	5.7	-0.000723503
4.5	5.7	-0.00105258
4.6	5.7	-0.00150558
4.7	5.7	-0.00211258
4.8	5.7	-0.00290184
4.9	5.7	-0.00389479
5	5.7	-0.00510038
5.1	5.7	-0.00651015
5.2	5.7	-0.00809521
5.3	5.7	-0.00980609
5.4	5.7	-0.0115755
5.5	5.7	-0.0133236
5.6	5.7	-0.0149637
5.7	5.7	-0.0164093
5.8	5.7	-0.0175805
5.9	5.7	-0.0184102
6	5.7	-0.01885
6.1	5.7	-0.0188755
6.2	5.7	-0.0184894
6.3	5.7	-0.0177225
6.4	5.7	-0.0166313
6.5	5.7	-0.0152917
6.6	5.7	-0.0137906
6.7	5.7	-0.0122162
6.8	5.7	-0.0106486
6.9	5.7	-0.00915323
7	5.7	-0.00777686
7.1	5.7	-0.00654704
7.2	5.7	-0.00547324
7.3	5.7	-0.00454938
7.4	5.7	-0.00375809
7.5	5.7	-0.00307679
7.6	5.7	-0.00248451
7.7	5.7	-0.00196689
7.8	5.7	-0.00151755
7.9	5.7	-0.00113576
8	5.7	-0.000821988
8.1	5.7	-0.000573952
8.2	5.7	-0.000385612
8.3	5.7	-0.000248469
8.4	5.7	-0.000153156
8.5	5.7	-9.03034e-05
8.6	5.7	-5.10918e-05
8.7	5.7	-2.78972e-05
8.8	5.7	-1.47987e-05
8.9	5.7	-7.67245e-06
9	5.7	-3.90415e-06
4	5.8	-0.000121482
4.1	5.8	-0.000186511
4.2	5.8	-0.000284213
4.3	5.8	-0.000429193
4.4	5.8	-0.000641151
4.5	5.8	-0.000945594
4.6	5.8	-0.00137389
4.7	5.8	-0.00196212
4.8	5.8	-0.00274818
4.9	5.8	-0.0037669
5	5.8	-0.00504333
5.1	5.8	-0.00658531
5.2	5.8	-0.00837696
5.3	5.8	-0.0103748
5.4	5.8	-0.0125076
5.5	5.8	-0.0146812
5.6	5.8	-0.0167853
5.7	5.8	-0.0187033
5.8	5.8	-0.0203228
5.9	5.8	-0.0215457
6	5.8	-0.0222974
6.1	5.8	-0.0225343
6.2	5.8	-0.0222494
6.3	5.8	-0.021473
6.4	5.8	-0.0202701
6.5	5.8	-0.0187324
6.6	5.8	-0.0169678
6.7	5.8	-0.0150875
6.8	5.8	-0.013194
6.9	5.8	-0.0113724
7	5.8	-0.00968461
7.1	5.8	-0.00816877
7.2	5.8	-0.00683972
7.3	5.8	-0.00569242
7.4	5.8	-0.00470707
7.5	5.8	-0.00385681
7.6	5.8	-0.00311636
7.7	5.8	-0.00246837
7.8	5.8	-0.00190528
7.9	5.8	-0.00142647
8	5.8	-0.00103272
8.1	5.8	-0.0007213
8.2	5.8	-0.000484732
8.3	5.8	-0.000312407
8.4	5.8	-0.000192607
8.5	5.8	-0.000113584
8.6	5.8	-6.42733e-05
8.7	5.8	-3.50992e-05
8.8	5.8	-1.86212e-05
8.9	5.8	-9.65518e-06
9	5.8	-4.91345e-06
4	5.9	-0.000103452
4.1	5.9	-0.000159719
4.2	5.9	-0.000245044
4.3	5.9	-0.000373087
4.4	5.9	-0.000562815
4.5	5.9	-0.000839702
4.6	5.9	-0.00123655
4.7	5.9	-0.0017934
4.8	5.9	-0.00255582
4.9	5.9	-0.00357085
5	5.9	-0.00488038
5.1	5.9	-0.0065122
5.2	5.9	-0.00847028
5.3	5.9	-0.0107263
5.4	5.9	-0.0132151
5.5	5.9	-0.0158356
5.6	5.9	-0.0184571
5.7	5.9	-0.0209315
5.8	5.9	-0.0231071
5.9	5.9	-0.0248447
6	5.9	-0.0260316
6.1	5.9	-0.0265943
6.2	5.9	-0.0265065
6.3	5.9	-0.0257917
6.4	5.9	-0.0245204
6.5	5.9	-0.0228004
6.6	5.9	-0.0207633
6.7	5.9	-0.0185478
6.8	5.9	-0.0162845
6.9	5.9	-0.0140837
7	5.9	-0.0120278
7.1	5.9	-0.0101694
7.2	5.9	-0.00853148
7.3	5.9	-0.00711163
7.4	5.9	-0.00588803
7.5	5.9	-0.00482926
7.6	5.9	-0.00390521
7.7	5.9	-0.00309519
7.8	5.9	-0.00239039
7.9	5.9	-0.0017905
8	5.9	-0.00129679
8.1	5.9	-0.000906068
8.2	5.9	-0.000609096
8.3	5.9	-0.000392671
8.4	5.9	-0.000242152
8.5	5.9	-0.000142833
8.6	5.9	-8.08401e-05
8.7	5.9	-4.41536e-05
8.8	5.9	-2.34282e-05
8.9	5.9	-1.2149e-05
9	5.9	-6.18316e-06
4	6	-8.78649e-05
4.1	6	-0.000136268
4.2	6	-0.000210223
4.3	6	-0.000322227
4.4	6	-0.000490039
4.5	6	-0.000738215
4.6	6	-0.00109955
4.7	6	-0.00161597
4.8	6	-0.00233813
4.9	6	-0.00332284
5	6	-0.0046274
5.1	6	-0.0063006
5.2	6	-0.00837091
5.3	6	-0.0108339
5.4	6	-0.0136416
5.5	6	-0.0166982
5.6	6	-0.0198619
5.7	6	-0.0229564
5.8	6	-0.0257884
5.9	6	-0.0281686
6	6	-0.0299337
6.1	6	-0.0309657
6.2	6	-0.0312054
6.3	6	-0.0306592
6.4	6	-0.029396
6.5	6	-0.0275373
6.6	6	-0.0252395
6.7	6	-0.0226733
6.8	6	-0.0200033
6.9	6	-0.0173718
7	6	-0.0148882
7.1	6	-0.0126248
7.2	6	-0.0106171
7.3	6	-0.00886752
7.4	6	-0.00735333
7.5	6	-0.00603859
7.6	6	-0.004888
7.7	6	-0.00387725
7.8	6	-0.00299638
7.9	6	-0.00224571
8	6	-0.00162731
8.1	6	-0.00113752
8.2	6	-0.000764997
8.3	6	-0.000493352
8.4	6	-0.000304336
8.5	6	-0.000179562
8.6	6	-0.000101653
8.7	6	-5.55327e-05
8.8	6	-2.94713e-05
8.9	6	-1.52851e-05
9	6	-7.78016e-06
4	6.1	-7.44378e-05
4.1	6.1	-0.000115865
4.2	6.1	-0.000179548
4.3	6.1	-0.000276718
4.4	6.1	-0.000423634
4.5	6.1	-0.000643304
4.6	6.1	-0.000967364
4.7	6.1	-0.00143776
4.8	6.1	-0.00210759
4.9	6.1	-0.00304021
5	6.1	-0.00430526
5.1	6.1	-0.00597087
5.2	6.1	-0.00809144
5.3	6.1	-0.0106923
5.4	6.1	-0.0137537
5.5	6.1	-0.0171989
5.6	6.1	-0.0208897
5.7	6.1	-0.0246324
5.8	6.1	-0.0281961
5.9	6.1	-0.0313375
6	6.1	-0.0338316
6.1	6.1	-0.0354997
6.2	6.1	-0.0362325
6.3	6.1	-0.0360028
6.4	6.1	-0.0348663
6.5	6.1	-0.032951
6.6	6.1	-0.0304363
6.7	6.1	-0.0275274
6.8	6.1	-0.0244289
6.9	6.1	-0.0213228
7	6.1	-0.0183531
7.1	6.1	-0.0156193
7.2	6.1	-0.0131747
7.3	6.1	-0.0110304
7.4	6.1	-0.00916473
7.5	6.1	-0.00753779
7.6	6.1	-0.0061091
7.7	6.1	-0.00485073
7.8	6.1	-0.00375185
7.9	6.1	-0.00281395
8	6.1	-0.00204038
8.1	6.1	-0.00142708
8.2	6.1	-0.000960216
8.3	6.1	-0.000619529
8.4	6.1	-0.000382322
8.5	6.1	-0.000225654
8.6	6.1	-0.000127785
8.7	6.1	-6.98271e-05
8.8	6.1	-3.70657e-05
8.9	6.1	-1.92274e-05
9	6.1	-9.78835e-06
4	6.2	-6.29009e-05
4.1	6.2	-9.81939e-05
4.2	6.2	-0.000152715
4.3	6.2	-0.000236409
4.4	6.2	-0.000363892
4.5	6.2	-0.000556229
4.6	6.2	-0.000843068
4.7	6.2	-0.00126488
4.8	6.2	-0.00187484
4.9	6.2	-0.00273944
5	6.2	-0.00393669
5.1	6.2	-0.00555022
5.2	6.2	-0.00765849
5.3	6.2	-0.0103185
5.4	6.2	-0.0135464
5.5	6.2	-0.017298
5.6	6.2	-0.0214556
5.7	6.2	-0.0258261
5.8	6.2	-0.0301531
5.9	6.2	-0.034144
6	6.2	-0.0375063
6.1	6.2	-0.0399865
6.2	6.2	-0.0414055
6.3	6.2	-0.0416816
6.4	6.2	-0.0408387
6.5	6.2	-0.0389977
6.6	6.2	-0.0363541
6.7	6.2	-0.0331468
6.8	6.2	-0.0296246
6.9	6.2	-0.0260166
7	6.2	-0.0225108
7.1	6.2	-0.0192425
7.2	6.2	-0.0162905
7.3	6.2	-0.0136801
7.4	6.2	-0.0113936
7.5	6.2	-0.00938906
7.6	6.2	-0.00762121
7.7	6.2	-0.00605897
7.8	6.2	-0.00469131
7.9	6.2	-0.00352176
8	6.2	-0.00255565
8.1	6.2	-0.00178875
8.2	6.2	-0.00120433
8.3	6.2	-0.000777469
8.4	6.2	-0.000480028
8.5	6.2	-0.000283446
8.6	6.2	-0.000160573
8.7	6.2	-8.77735e-05
8.8	6.2	-4.66052e-05
8.9	6.2	-2.41816e-05
9	6.2	-1.23128e-05
4	6.3	-5.301e-05
4.1	6.3	-8.29477e-05
4.2	6.3	-0.000129379
4.3	6.3	-0.000201004
4.4	6.3	-0.000310759
4.5	6.3	-0.000477574
4.6	6.3	-0.000728583
4.7	6.3	-0.00110171
4.8	6.3	-0.00164825
4.9	6.3	-0.00243485
5	6.3	-0.00354357
5.1	6.3	-0.00506863
5.2	6.3	-0.0071079
5.3	6.3	-0.00974803
5.4	6.3	-0.0130435
5.5	6.3	-0.0169925
5.6	6.3	-0.0215144
5.7	6.3	-0.0264373
5.8	6.3	-0.0315006
5.9	6.3	-0.0363769
6	6.3	-0.0407102
6.1	6.3	-0.0441649
6.2	6.3	-0.0464741
6.3	6.3	-0.0474779
6.4	6.3	-0.0471435
6.5	6.3	-0.0455636
6.6	6.3	-0.0429351
6.7	6.3	-0.0395239
6.8	6.3	-0.0356233
6.9	6.3	-0.0315154
7	6.3	-0.0274418
7.1	6.3	-0.0235839
7.2	6.3	-0.0200556
7.3	6.3	-0.0169039
7.4	6.3	-0.0141205
7.5	6.3	-0.0116639
7.6	6.3	-0.00948581
7.7	6.3	-0.00755314
7.8	6.3	-0.00585588
7.9	6.3	-0.00440098
8	6.3	-0.00319689
8.1	6.3	-0.00223956
8.2	6.3	-0.00150906
8.3	6.3	-0.000974879
8.4	6.3	-0.00060229
8.5	6.3	-0.000355835
8.6	6.3	-0.000201679
8.7	6.3	-0.000110289
8.8	6.3	-5.85811e-05
8.9	6.3	-3.04045e-05
9	6.3	-1.54852e-05
4	6.4	-4.455e-05
4.1	6.4	-6.98411e-05
4.2	6.4	-0.00010919
4.3	6.4	-0.00017013
4.4	6.4	-0.000263966
4.5	6.4	-0.000407441
4.6	6.4	-0.000624914
4.7	6.4	-0.000951068
4.8	6.4	-0.00143395
4.9	6.4	-0.00213786
5	6.4	-0.00314511
5.1	6.4	-0.00455518
5.2	6.4	-0.00647924
5.3	6.4	-0.00902805
5.4	6.4	-0.0122922
5.5	6.4	-0.0163159
5.6	6.4	-0.0210676
5.7	6.4	-0.0264171
5.8	6.4	-0.0321246
5.9	6.4	-0.037852
6	6.4	-0.043197
6.1	6.4	-0.0477456
6.2	6.4	-0.051133
6.3	6.4	-0.0530993
6.4	6.4	-0.0535263
6.5	6.4	-0.0524498
6.6	6.4	-0.0500442
6.7	6.4	-0.0465865
6.8	6.4	-0.0424085
6.9	6.4	-0.0378476
7	6.4	-0.0332062
7.1	6.4	-0.0287234
7.2	6.4	-0.0245595
7.3	6.4	-0.020793
7.4	6.4	-0.0174326
7.5	6.4	-0.014442
7.6	6.4	-0.011773
7.7	6.4	-0.00939248
7.8	6.4	-0.00729378
7.9	6.4	-0.00548938
8	6.4	-0.0039925
8.1	6.4	-0.00280006
8.2	6.4	-0.00188862
8.3	6.4	-0.00122116
8.4	6.4	-0.000755037
8.5	6.4	-0.000446387
8.6	6.4	-0.000253156
8.7	6.4	-0.000138512
8.8	6.4	-7.36048e-05
8.9	6.4	-3.82163e-05
9	6.4	-1.94697e-05
4	6.5	-3.73334e-05
4.1	6.5	-5.86157e-05
4.2	6.5	-9.18123e-05
4.3	6.5	-0.000143386
4.4	6.5	-0.000223113
4.5	6.5	-0.000345606
4.6	6.5	-0.000532383
4.7	6.5	-0.000814543
4.8	6.5	-0.00123599
4.9	6.5	-0.00185691
5	6.5	-0.00275673
5.1	6.5	-0.0040354
5.2	6.5	-0.00581086
5.3	6.5	-0.0082106
5.4	6.5	-0.0113549
5.5	6.5	-0.0153313
5.6	6.5	-0.020163
5.7	6.5	-0.025776
5.8	6.5	-0.0319758
5.9	6.5	-0.0384437
6	6.5	-0.0447592
6.1	6.5	-0.0504484
6.2	6.5	-0.0550522
6.3	6.5	-0.0581971
6.4	6.5	-0.0596531
6.5	6.5	-0.0593654
6.6	6.5	-0.057453
6.7	6.5	-0.0541778
6.8	6.5	-0.0498936
6.9	6.5	-0.0449875
7	6.5	-0.0398269
7.1	6.5	-0.0347181
7.2	6.5	-0.0298802
7.3	6.5	-0.0254357
7.4	6.5	-0.0214198
7.5	6.5	-0.017809
7.6	6.5	-0.01456
7.7	6.5	-0.0116438
7.8	6.5	-0.00906034
7.9	6.5	-0.00683091
8	6.5	-0.00497597
8.1	6.5	-0.00349468
8.2	6.5	-0.00236008
8.3	6.5	-0.0015277
8.4	6.5	-0.000945495
8.5	6.5	-0.000559474
8.6	6.5	-0.000317532
8.7	6.5	-0.000173849
8.8	6.5	-9.24347e-05
8.9	6.5	-4.80154e-05
9	6.5	-2.44714e-05
4	6.6	-3.11963e-05
4.1	6.6	-4.90391e-05
4.2	6.6	-7.69273e-05
4.3	6.6	-0.000120364
4.4	6.6	-0.000187725
4.5	6.6	-0.000291622
4.6	6.6	-0.00045081
4.7	6.6	-0.000692719
4.8	6.6	-0.00105667
4.9	6.6	-0.00159758
5	6.6	-0.00238978
5.1	6.6	-0.00352976
5.2	6.6	-0.00513633
5.3	6.6	-0.00734573
5.4	6.6	-0.0102991
5.5	6.6	-0.0141202
5.6	6.6	-0.0188843
5.7	6.6	-0.0245804
5.8	6.6	-0.031078
5.9	6.6	-0.038107
6	6.6	-0.0452633
6.1	6.6	-0.0520454
6.2	6.6	-0.0579201
6.3	6.6	-0.0624024
6.4	6.6	-0.0651336
6.5	6.6	-0.0659364
6.6	6.6	-0.0648358
6.7	6.6	-0.0620414
6.8	6.6	-0.0579004
6.9	6.6	-0.0528334
7	6.6	-0.0472682
7.1	6.6	-0.0415838
7.2	6.6	-0.0360698
7.3	6.6	-0.030906
7.4	6.6	-0.0261666
7.5	6.6	-0.0218509
7.6	6.6	-0.0179282
7.7	6.6	-0.0143797
7.8	6.6	-0.0112172
7.9	6.6	-0.00847547
8	6.6	-0.00618595
8.1	6.6	-0.00435205
8.2	6.6	-0.00294368
8.3	6.6	-0.00190811
8.4	6.6	-0.00118238
8.5	6.6	-0.000700409
8.6	6.6	-0.0003979
8.7	6.6	-0.000218031
8.8	6.6	-0.000116008
8.9	6.6	-6.02962e-05
9	6.6	-3.07453e-05
4	6.7	-2.59946e-05
4.1	6.7	-4.09014e-05
4.2	6.7	-6.42388e-05
4.3	6.7	-0.000100661
4.4	6.7	-0.000157288
4.5	6.7	-0.000244903
4.6	6.7	-0.000379667
4.7	6.7	-0.000585445
4.8	6.7	-0.000896861
4.9	6.7	-0.00136304
5	6.7	-0.00205174
5.1	6.7	-0.00305321
5.2	6.7	-0.00448231
5.3	6.7	-0.00647682
5.4	6.7	-0.00918927
5.5	6.7	-0.0127694
5.6	6.7	-0.017336
5.7	6.7	-0.0229396
5.8	6.7	-0.0295224
5.9	6.7	-0.036885
6	6.7	-0.0446742
6.1	6.7	-0.0524008
6.2	6.7	-0.0594932
6.3	6.7	-0.0653766
6.4	6.7	-0.0695639
6.5	6.7	-0.0717343
6.6	6.7	-0.0717813
6.7	6.7	-0.0698183
6.8	6.7	-0.0661454
6.9	6.7	-0.0611861
7	6.7	-0.0554124
7.1	6.7	-0.0492731
7.2	6.7	-0.0431353
7.3	6.7	-0.0372485
7.4	6.7	-0.0317404
7.5	6.7	-0.0266458
7.6	6.7	-0.0219573
7.7	6.7	-0.0176749
7.8	6.7	-0.0138301
7.9	6.7	-0.0104778
8	6.7	-0.00766583
8.1	6.7	-0.0054049
8.2	6.7	-0.00366293
8.3	6.7	-0.00237845
8.4	6.7	-0.00147611
8.5	6.7	-0.000875593
8.6	6.7	-0.000498018
8.7	6.7	-0.000273175
8.8	6.7	-0.000145477
8.9	6.7	-7.56689e-05
9	6.7	-3.86074e-05
4	6.8	-2.16006e-05
4.1	6.8	-3.40138e-05
4.2	6.8	-5.34724e-05
4.3	6.8	-8.38907e-05
4.4	6.8	-0.000131278
4.5	6.8	-0.000204783
4.6	6.8	-0.000318198
4.7	6.8	-0.000492048
4.8	6.8	-0.000756402
4.9	6.8	-0.00115445
5	6.8	-0.00174671
5.1	6.8	-0.00261541
5.2	6.8	-0.00386798
5.3	6.8	-0.00563792
5.4	6.8	-0.00808047
5.5	6.8	-0.0113602
5.6	6.8	-0.0156278
5.7	6.8	-0.0209862
5.8	6.8	-0.027449
5.9	6.8	-0.034899
6	6.8	-0.0430601
6.1	6.8	-0.0514951
6.2	6.8	-0.0596389
6.3	6.8	-0.066866
6.4	6.8	-0.0725834
6.5	6.8	-0.0763247
6.6	6.8	-0.0778263
6.7	6.8	-0.077063
6.8	6.8	-0.0742386
6.9	6.8	-0.0697356
7	6.8	-0.0640389
7.1	6.8	-0.057651
7.2	6.8	-0.0510146
7.3	6.8	-0.0444577
7.4	6.8	-0.0381747
7.5	6.8	-0.0322508
7.6	6.8	-0.0267154
7.7	6.8	-0.0215995
7.8	6.8	-0.0169645
7.9	6.8	-0.0128951
8	6.8	-0.00946246
8.1	6.8	-0.00668958
8.2	6.8	-0.00454453
8.3	6.8	-0.00295727
8.4	6.8	-0.00183886
8.5	6.8	-0.00109263
8.6	6.8	-0.000622398
8.7	6.8	-0.000341846
8.8	6.8	-0.000182249
8.9	6.8	-9.48837e-05
9	6.8	-4.84481e-05
4	6.9	-1.79016e-05
4.1	6.9	-2.82061e-05
4.2	6.9	-4.43761e-05
4.3	6.9	-6.96863e-05
4.4	6.9	-0.000109179
4.5	6.9	-0.000170563
4.6	6.9	-0.000265514
4.7	6.9	-0.000411513
4.8	6.9	-0.000634374
4.9	6.9	-0.000971536
5	6.9	-0.00147613
5.1	6.9	-0.00222149
5.2	6.9	-0.00330548
5.3	6.9	-0.00485308
5.4	6.9	-0.00701526
5.5	6.9	-0.00996115
5.6	6.9	-0.0138607
5.7	6.9	-0.0188559
5.8	6.9	-0.0250223
5.9	6.9	-0.0323244
6	6.9	-0.0405775
6.1	6.9	-0.049427
6.2	6.9	-0.0583588
6.3	6.9	-0.0667467
6.4	6.9	-0.0739333
6.5	6.9	-0.0793297
6.6	6.9	-0.0825105
6.7	6.9	-0.0832816
6.8	6.9	-0.0817027
6.9	6.9	-0.0780623
7	6.9	-0.0728114
7.1	6.9	-0.0664737
7.2	6.9	-0.0595524
7.3	6.9	-0.0524533
7.4	6.9	-0.0454473
7.5	6.9	-0.038684
7.6	6.9	-0.0322457
7.7	6.9	-0.0262089
7.8	6.9	-0.020679
7.9	6.9	-0.0157823
8	6.9	-0.0116234
8.1	6.9	-0.0082446
8.2	6.9	-0.00561771
8.3	6.9	-0.00366544
8.4	6.9	-0.00228467
8.5	6.9	-0.00136042
8.6	6.9	-0.000776392
8.7	6.9	-0.000427121
8.8	6.9	-0.000228029
8.9	6.9	-0.000118856
9	6.9	-6.07469e-05
4	7	-1.47974e-05
4.1	7	-2.33264e-05
4.2	7	-3.67212e-05
4.3	7	-5.77092e-05
4.4	7	-9.05002e-05
4.5	7	-0.000141549
4.6	7	-0.000220672
4.7	7	-0.000342639
4.8	7	-0.000529391
4.9	7	-0.000813008
5	7	-0.00123947
5.1	7	-0.00187306
5.2	7	-0.002801
5.3	7	-0.00413715
5.4	7	-0.00602314
5.5	7	-0.00862444
5.6	7	-0.0121183
5.7	7	-0.0166716
5.8	7	-0.0224069
5.9	7	-0.0293609
6	7	-0.0374411
6.1	7	-0.0463922
6.2	7	-0.0557863
6.3	7	-0.0650456
6.4	7	-0.0735026
6.5	7	-0.0804899
6.6	7	-0.0854429
6.7	7	-0.0879913
6.8	7	-0.0880162
6.9	7	-0.0856593
7	7	-0.0812806
7.1	7	-0.0753769
7.2	7	-0.0684789
7.3	7	-0.0610555
7.4	7	-0.0534547
7.5	7	-0.0459018
7.6	7	-0.0385469
7.7	7	-0.0315289
7.8	7	-0.0250137
7.9	7	-0.0191846
8	7	-0.0141924
8.1	7	-0.0101079
8.2	7	-0.00691283
8.3	7	-0.00452549
8.4	7	-0.00282914
8.5	7	-0.00168909
8.6	7	-0.000966228
8.7	7	-0.000532642
8.8	7	-0.00028486
8.9	7	-0.000148695
9	7	-7.60889e-05
4	7.1	-1.22003e-05
4.1	7.1	-1.92398e-05
4.2	7.1	-3.03025e-05
4.3	7.1	-4.76507e-05
4.4	7.1	-7.47829e-05
4.5	7.1	-0.000117077
4.6	7.1	-0.000182734
4.7	7.1	-0.000284147
4.8	7.1	-0.000439815
4.9	7.1	-0.000676954
5	7.1	-0.00103488
5.1	7.1	-0.00156916
5.2	7.1	-0.00235615
5.3	7.1	-0.00349729
5.4	7.1	-0.00512174
5.5	7.1	-0.00738533
5.6	7.1	-0.0104631
5.7	7.1	-0.0145331
5.8	7.1	-0.0197491
5.9	7.1	-0.0262042
6	7.1	-0.0338879
6.1	7.1	-0.0426467
6.2	7.1	-0.0521586
6.3	7.1	-0.0619332
6.4	7.1	-0.0713466
6.5	7.1	-0.0797106
6.6	7.1	-0.0863675
6.7	7.1	-0.0907923
6.8	7.1	-0.0926778
6.9	7.1	-0.09198
7	7.1	-0.0889115
7.1	7.1	-0.0838818
7.2	7.1	-0.0773994
7.3	7.1	-0.0699641
7.4	7.1	-0.0619879
7.5	7.1	-0.0537733
7.6	7.1	-0.0455502
7.7	7.1	-0.0375363
7.8	7.1	-0.029976
7.9	7.1	-0.023127
8	7.1	-0.017202
8.1	7.1	-0.0123125
8.2	7.1	-0.00845886
8.3	7.1	-0.00556035
8.4	7.1	-0.00348892
8.5	7.1	-0.00208987
8.6	7.1	-0.00119898
8.7	7.1	-0.000662634
8.8	7.1	-0.000355153
8.9	7.1	-0.000185727
9	7.1	-9.51818e-05
4	7.2	-1.00337e-05
4.1	7.2	-1.58279e-05
4.2	7.2	-2.49384e-05
4.3	7.2	-3.92344e-05
4.4	7.2	-6.16116e-05
4.5	7.2	-9.65291e-05
4.6	7.2	-0.000150805
4.7	7.2	-0.000234773
4.8	7.2	-0.00036392
4.9	7.2	-0.000561146
5	7.2	-0.000859749
5.1	7.2	-0.00130717
5.2	7.2	-0.00196929
5.3	7.2	-0.00293488
5.4	7.2	-0.00431907
5.5	7.2	-0.00626424
5.6	7.2	-0.00893624
5.7	7.2	-0.0125133
5.8	7.2	-0.0171654
5.9	7.2	-0.0230242
6	7.2	-0.0301449
6.1	7.2	-0.0384657
6.2	7.2	-0.0477738
6.3	7.2	-0.0576891
6.4	7.2	-0.0676739
6.5	7.2	-0.0770768
6.6	7.2	-0.0852076
6.7	7.2	-0.0914344
6.8	7.2	-0.0952819
6.9	7.2	-0.0965078
7	7.2	-0.0951348
7.1	7.2	-0.0914254
7.2	7.2	-0.0858039
7.3	7.2	-0.0787514
7.4	7.2	-0.0707128
7.5	7.2	-0.0620564
7.6	7.2	-0.0530947
7.7	7.2	-0.0441364
7.8	7.2	-0.0355212
7.9	7.2	-0.0275995
8	7.2	-0.0206632
8.1	7.2	-0.0148796
8.2	7.2	-0.0102793
8.3	7.2	-0.00679109
8.4	7.2	-0.00428057
8.5	7.2	-0.00257455
8.6	7.2	-0.00148241
8.7	7.2	-0.000821875
8.8	7.2	-0.000441701
8.9	7.2	-0.000231516
9	7.2	-0.000118872
4	7.3	-8.2311e-06
4.1	7.3	-1.29876e-05
4.2	7.3	-2.04695e-05
4.3	7.3	-3.22161e-05
4.4	7.3	-5.06148e-05
4.5	7.3	-7.93479e-05
4.6	7.3	-0.000124057
4.7	7.3	-0.000193313
4.8	7.3	-0.000300003
4.9	7.3	-0.00046326
5	7.3	-0.000711049
5.1	7.3	-0.00108347
5.2	7.3	-0.0016367
5.3	7.3	-0.00244728
5.4	7.3	-0.0036159
5.5	7.3	-0.00526965
5.6	7.3	-0.00756069
5.7	7.3	-0.0106593
5.8	7.3	-0.0147393
5.9	7.3	-0.0199543
6	7.3	-0.0264059
6.1	7.3	-0.0341068
6.2	7.3	-0.0429439
6.3	7.3	-0.0526522
6.4	7.3	-0.0628054
6.5	7.3	-0.0728348
6.6	7.3	-0.0820787
6.7	7.3	-0.0898611
6.8	7.3	-0.0955869
6.9	7.3	-0.0988348
7	7.3	-0.099422
7.1	7.3	-0.0974185
7.2	7.3	-0.093103
7.3	7.3	-0.086876
7.4	7.3	-0.0791672
7.5	7.3	-0.070382
7.6	7.3	-0.0609051
7.7	7.3	-0.0511394
7.8	7.3	-0.0415312
7.9	7.3	-0.0325395
8	7.3	-0.0245522
8.1	7.3	-0.0178091
8.2	7.3	-0.012386
8.3	7.3	-0.00823338
8.4	7.3	-0.00521871
8.5	7.3	-0.00315463
8.6	7.3	-0.00182459
8.7	7.3	-0.00101558
8.8	7.3	-0.000547651
8.9	7.3	-0.000287869
9	7.3	-0.000148155
4	7.4	-6.73555e-06
4.1	7.4	-1.06299e-05
4.2	7.4	-1.67577e-05
4.3	7.4	-2.63824e-05
4.4	7.4	-4.14655e-05
4.5	7.4	-6.50362e-05
4.6	7.4	-0.000101743
4.7	7.4	-0.000158662
4.8	7.4	-0.00024646
4.9	7.4	-0.000381026
5	7.4	-0.000585678
5.1	7.4	-0.000894032
5.2	7.4	-0.00135351
5.3	7.4	-0.00202929
5.4	7.4	-0.00300815
5.5	7.4	-0.00440133
5.6	7.4	-0.00634495
5.7	7.4	-0.00899615
5.8	7.4	-0.0125231
5.9	7.4	-0.0170877
6	7.4	-0.0228199
6.1	7.4	-0.0297863
6.2	7.4	-0.037956
6.3	7.4	-0.0471696
6.4	7.4	-0.0571188
6.5	7.4	-0.0673452
6.6	7.4	-0.0772643
6.7	7.4	-0.0862191
6.8	7.4	-0.0935591
6.9	7.4	-0.0987321
7	7.4	-0.101368
7.1	7.4	-0.101326
7.2	7.4	-0.098692
7.3	7.4	-0.0937256
7.4	7.4	-0.0867816
7.5	7.4	-0.0782571
7.6	7.4	-0.0685821
7.7	7.4	-0.0582431
7.8	7.4	-0.0477945
7.9	7.4	-0.0378125
8	7.4	-0.0287943
8.1	7.4	-0.0210679
8.2	7.4	-0.0147714
8.3	7.4	-0.00989242
8.4	7.4	-0.00631313
8.5	7.4	-0.00383984
8.6	7.4	-0.00223323
8.7	7.4	-0.0012491
8.8	7.4	-0.000676418
8.9	7.4	-0.000356818
9	7.4	-0.000184182
4	7.5	-5.49816e-06
4.1	7.5	-8.67841e-06
4.2	7.5	-1.3684e-05
4.3	7.5	-2.15487e-05
4.4	7.5	-3.3879e-05
4.5	7.5	-5.31579e-05
4.6	7.5	-8.32011e-05
4.7	7.5	-0.000129826
4.8	7.5	-0.000201822
4.9	7.5	-0.000312312
5	7.5	-0.000480622
5.1	7.5	-0.000734733
5.2	7.5	-0.00111434
5.3	7.5	-0.00167438
5.4	7.5	-0.00248871
5.5	7.5	-0.0036532
5.6	7.5	-0.00528715
5.7	7.5	-0.00753167
5.8	7.5	-0.0105433
5.9	7.5	-0.0144814
6	7.5	-0.0194891
6.1	7.5	-0.0256678
6.2	7.5	-0.0330474
6.3	7.5	-0.0415559
6.4	7.5	-0.0509946
6.5	7.5	-0.061023
6.6	7.5	-0.0711634
6.7	7.5	-0.0808287
6.8	7.5	-0.0893778
6.9	7.5	-0.0961923
7	7.5	-0.100761
7.1	7.5	-0.102751
7.2	7.5	-0.102036
7.3	7.5	-0.0986884
7.4	7.5	-0.0929296
7.5	7.5	-0.0850932
7.6	7.5	-0.075612
7.7	7.5	-0.0650293
7.8	7.5	-0.0539943
7.9	7.5	-0.0431969
8	7.5	-0.0332485
8.1	7.5	-0.0245766
8.2	7.5	-0.017398
8.3	7.5	-0.0117562
8.4	7.5	-0.00756475
8.5	7.5	-0.00463593
8.6	7.5	-0.00271461
8.7	7.5	-0.0015275
8.8	7.5	-0.000831492
8.9	7.5	-0.000440559
9	7.5	-0.000228242
4	7.6	-4.4773e-06
4.1	7.6	-7.06797e-06
4.2	7.6	-1.11464e-05
4.3	7.6	-1.75563e-05
4.4	7.6	-2.7609e-05
4.5	7.6	-4.33338e-05
4.6	7.6	-6.78517e-05
4.7	7.6	-0.000105928
4.8	7.6	-0.000164772
4.9	7.6	-0.000255175
5	7.6	-0.000393069
5.1	7.6	-0.000601602
5.2	7.6	-0.000913759
5.3	7.6	-0.00137546
5.4	7.6	-0.00204891
5.5	7.6	-0.00301566
5.6	7.6	-0.00437859
5.7	7.6	-0.00626167
5.8	7.6	-0.00880615
5.9	7.6	-0.012162
6	7.6	-0.0164739
6.1	7.6	-0.0218612
6.2	7.6	-0.0283943
6.3	7.6	-0.0360671
6.4	7.6	-0.044772
6.5	7.6	-0.0542789
6.6	7.6	-0.0642256
6.7	7.6	-0.0741261
6.8	7.6	-0.0834007
6.9	7.6	-0.0914303
7	7.6	-0.0976277
7.1	7.6	-0.101512
7.2	7.6	-0.102762
7.3	7.6	-0.101246
7.4	7.6	-0.0970088
7.5	7.6	-0.0902678
7.6	7.6	-0.0814065
7.7	7.6	-0.0709835
7.8	7.6	-0.0597127
7.9	7.6	-0.0483782
8	7.6	-0.0376965
8.1	7.6	-0.0281972
8.2	7.6	-0.0201883
8.3	7.6	-0.0137878
8.4	7.6	-0.00896036
8.5	7.6	-0.00554159
8.6	7.6	-0.00327194
8.7	7.6	-0.00185473
8.8	7.6	-0.00101611
8.9	7.6	-0.000541322
9	7.6	-0.000281723
4	7.7	-3.63757e-06
4.1	7.7	-5.74295e-06
4.2	7.7	-9.05802e-06
4.3	7.7	-1.42693e-05
4.4	7.7	-2.24444e-05
4.5	7.7	-3.52368e-05
4.6	7.7	-5.51911e-05
4.7	7.7	-8.61972e-05
4.8	7.7	-0.000134148
4.9	7.7	-0.00020788
5	7.7	-0.000320465
5.1	7.7	-0.000490954
5.2	7.7	-0.000746587
5.3	7.7	-0.00112547
5.4	7.7	-0.00167953
5.5	7.7	-0.00247741
5.6	7.7	-0.00360661
5.7	7.7	-0.00517416
5.8	7.7	-0.00730453
5.9	7.7	-0.010134
6	7.7	-0.0138006
6.1	7.7	-0.0184294
6.2	7.7	-0.0241131
6.3	7.7	-0.0308909
6.4	7.7	-0.0387241
6.5	7.7	-0.047475
6.6	7.7	-0.0568901
6.7	7.7	-0.0665945
6.8	7.7	-0.0761016
6.9	7.7	-0.0848438
7	7.7	-0.0922232
7.1	7.7	-0.0976746
7.2	7.7	-0.100729
7.3	7.7	-0.101064
7.4	7.7	-0.0985386
7.5	7.7	-0.0932127
7.6	7.7	-0.0853733
7.7	7.7	-0.0755445
7.8	7.7	-0.0644596
7.9	7.7	-0.0529603
8	7.7	-0.0418425
8.1	7.7	-0.0317268
8.2	7.7	-0.0230159
8.3	7.7	-0.0159169
8.4	7.7	-0.0104667
8.5	7.7	-0.00654463
8.6	7.7	-0.00390315
8.7	7.7	-0.00223253
8.8	7.7	-0.00123274
8.9	7.7	-0.000661153
9	7.7	-0.000346028
4	7.8	-2.94893e-06
4.1	7.8	-4.65613e-06
4.2	7.8	-7.34462e-06
4.3	7.8	-1.15716e-05
4.4	7.8	-1.82043e-05
4.5	7.8	-2.85859e-05
4.6	7.8	-4.47856e-05
4.7	7.8	-6.99688e-05
4.8	7.8	-0.000108937
4.9	7.8	-0.000168896
5	7.8	-0.000260533
5.1	7.8	-0.00039945
5.2	7.8	-0.000608026
5.3	7.8	-0.000917683
5.4	7.8	-0.00137145
5.5	7.8	-0.00202656
5.6	7.8	-0.00295664
5.7	7.8	-0.00425271
5.8	7.8	-0.0060224
5.9	7.8	-0.00838624
6	7.8	-0.0114707
6.1	7.8	-0.0153972
6.2	7.8	-0.0202681
6.3	7.8	-0.0261487
6.4	7.8	-0.0330482
6.5	7.8	-0.0408992
6.6	7.8	-0.0495397
6.7	7.8	-0.0586992
6.8	7.8	-0.0679953
6.9	7.8	-0.0769443
7	7.8	-0.0849896
7.1	7.8	-0.0915465
7.2	7.8	-0.0960601
7.3	7.8	-0.0980664
7.4	7.8	-0.0972529
7.5	7.8	-0.093516
7.6	7.8	-0.0870117
7.7	7.8	-0.078183
7.8	7.8	-0.0677305
7.9	7.8	-0.0565021
8	7.8	-0.0453313
8.1	7.8	-0.0349023
8.2	7.8	-0.0257026
8.3	7.8	-0.0180349
8.4	7.8	-0.012025
8.5	7.8	-0.00761771
8.6	7.8	-0.00459821
8.7	7.8	-0.00265886
8.8	7.8	-0.00148228
8.9	7.8	-0.000801562
9	7.8	-0.00042243
4	7.9	-2.38592e-06
4.1	7.9	-3.76743e-06
4.2	7.9	-5.94328e-06
4.3	7.9	-9.36479e-06
4.4	7.9	-1.47345e-05
4.5	7.9	-2.31412e-05
4.6	7.9	-3.6263e-05
4.7	7.9	-5.66686e-05
4.8	7.9	-8.8258e-05
4.9	7.9	-0.000136892
5	7.9	-0.000211271
[truncated: 601 more rows]

## Sheet: Fig4c
4	4	0.000216744
4.1	4	0.000234308
4.2	4	0.000249232
4.3	4	0.000261325
4.4	4	0.000270513
4.5	4	0.000276793
4.6	4	0.000280198
4.7	4	0.000280771
4.8	4	0.000278548
4.9	4	0.000273558
5	4	0.000265835
5.1	4	0.000255431
5.2	4	0.000242442
5.3	4	0.000227037
5.4	4	0.000209481
5.5	4	0.000190152
5.6	4	0.000169547
5.7	4	0.000148271
5.8	4	0.000127004
5.9	4	0.00010644
6	4	8.72179e-05
6.1	4	6.98347e-05
6.2	4	5.45927e-05
6.3	4	4.15925e-05
6.4	4	3.07797e-05
6.5	4	2.20145e-05
6.6	4	1.51233e-05
6.7	4	9.91181e-06
6.8	4	6.15467e-06
6.9	4	3.59327e-06
7	4	1.95364e-06
7.1	4	9.74983e-07
7.2	4	4.33383e-07
7.3	4	1.55515e-07
7.4	4	2.3004e-08
7.5	4	-3.39126e-08
7.6	4	-5.16432e-08
7.7	4	-4.90877e-08
7.8	4	-3.74854e-08
7.9	4	-2.4305e-08
8	4	-1.38846e-08
8.1	4	-7.41932e-09
8.2	4	-3.98628e-09
8.3	4	-2.20688e-09
8.4	4	-1.20381e-09
8.5	4	-6.11089e-10
8.6	4	-2.80946e-10
8.7	4	-1.17143e-10
8.8	4	-4.5006e-11
8.9	4	-1.62493e-11
9	4	-5.61184e-12
4	4.1	0.000246252
4.1	4.1	0.000270759
4.2	4.1	0.000292257
4.3	4.1	0.000310289
4.4	4.1	0.000324593
4.5	4.1	0.000335049
4.6	4.1	0.000341633
4.7	4.1	0.000344368
4.8	4.1	0.0003433
4.9	4.1	0.000338482
5	4.1	0.000329978
5.1	4.1	0.000317884
5.2	4.1	0.000302352
5.3	4.1	0.000283621
5.4	4.1	0.00026205
5.5	4.1	0.000238137
5.6	4.1	0.000212526
5.7	4.1	0.000185997
5.8	4.1	0.000159416
5.9	4.1	0.000133673
6	4.1	0.000109579
6.1	4.1	8.77703e-05
6.2	4.1	6.86338e-05
6.3	4.1	5.23026e-05
6.4	4.1	3.8713e-05
6.5	4.1	2.76931e-05
6.6	4.1	1.90269e-05
6.7	4.1	1.24715e-05
6.8	4.1	7.74479e-06
6.9	4.1	4.52196e-06
7	4.1	2.45871e-06
7.1	4.1	1.2271e-06
7.2	4.1	5.45473e-07
7.3	4.1	1.95742e-07
7.4	4.1	2.89529e-08
7.5	4.1	-4.26905e-08
7.6	4.1	-6.50095e-08
7.7	4.1	-6.17929e-08
7.8	4.1	-4.71878e-08
7.9	4.1	-3.0596e-08
8	4.1	-1.74785e-08
8.1	4.1	-9.33982e-09
8.2	4.1	-5.01818e-09
8.3	4.1	-2.77819e-09
8.4	4.1	-1.51545e-09
8.5	4.1	-7.69296e-10
8.6	4.1	-3.53684e-10
8.7	4.1	-1.47471e-10
8.8	4.1	-5.6659e-11
8.9	4.1	-2.04564e-11
9	4.1	-7.06535e-12
4	4.2	0.000274323
4.1	4.2	0.000307495
4.2	4.2	0.000337584
4.3	4.2	0.000363706
4.4	4.2	0.000385255
4.5	4.2	0.000401869
4.6	4.2	0.000413373
4.7	4.2	0.000419711
4.8	4.2	0.000420905
4.9	4.2	0.000417018
5	4.2	0.000408153
5.1	4.2	0.00039446
5.2	4.2	0.000376166
5.3	4.2	0.00035361
5.4	4.2	0.000327279
5.5	4.2	0.000297831
5.6	4.2	0.000266106
5.7	4.2	0.000233107
5.8	4.2	0.000199948
5.9	4.2	0.000167768
6	4.2	0.000137602
6.1	4.2	0.000110265
6.2	4.2	8.62555e-05
6.3	4.2	6.57512e-05
6.4	4.2	4.86795e-05
6.5	4.2	3.48295e-05
6.6	4.2	2.3934e-05
6.7	4.2	1.56901e-05
6.8	4.2	9.74461e-06
6.9	4.2	5.69011e-06
7	4.2	3.0941e-06
7.1	4.2	1.54431e-06
7.2	4.2	6.86514e-07
7.3	4.2	2.46363e-07
7.4	4.2	3.64378e-08
7.5	4.2	-5.37394e-08
7.6	4.2	-8.18337e-08
7.7	4.2	-7.7785e-08
7.8	4.2	-5.94004e-08
7.9	4.2	-3.85148e-08
8	4.2	-2.20023e-08
8.1	4.2	-1.17573e-08
8.2	4.2	-6.31712e-09
8.3	4.2	-3.49735e-09
8.4	4.2	-1.90777e-09
8.5	4.2	-9.68455e-10
8.6	4.2	-4.4525e-10
8.7	4.2	-1.85651e-10
8.8	4.2	-7.13283e-11
8.9	4.2	-2.57525e-11
9	4.2	-8.89444e-12
4	4.3	0.000298944
4.1	4.3	0.000342376
4.2	4.3	0.000383194
4.3	4.3	0.000419903
4.4	4.3	0.00045135
4.5	4.3	0.000476735
4.6	4.3	0.000495571
4.7	4.3	0.000507605
4.8	4.3	0.000512756
4.9	4.3	0.000511061
5	4.3	0.000502644
5.1	4.3	0.000487719
5.2	4.3	0.00046661
5.3	4.3	0.00043979
5.4	4.3	0.000407917
5.5	4.3	0.000371864
5.6	4.3	0.00033273
5.7	4.3	0.000291813
5.8	4.3	0.000250547
5.9	4.3	0.000210392
6	4.3	0.000172678
6.1	4.3	0.000138449
6.2	4.3	0.000108353
6.3	4.3	8.26274e-05
6.4	4.3	6.1193e-05
6.5	4.3	4.3794e-05
6.6	4.3	3.01004e-05
6.7	4.3	1.97359e-05
6.8	4.3	1.2259e-05
6.9	4.3	7.15916e-06
7	4.3	3.89329e-06
7.1	4.3	1.94336e-06
7.2	4.3	8.63961e-07
7.3	4.3	3.10055e-07
7.4	4.3	4.58539e-08
7.5	4.3	-6.76464e-08
7.6	4.3	-1.03009e-07
7.7	4.3	-9.79134e-08
7.8	4.3	-7.47719e-08
7.9	4.3	-4.84818e-08
8	4.3	-2.76964e-08
8.1	4.3	-1.48001e-08
8.2	4.3	-7.95214e-09
8.3	4.3	-4.40263e-09
8.4	4.3	-2.40162e-09
8.5	4.3	-1.21916e-09
8.6	4.3	-5.60518e-10
8.7	4.3	-2.33715e-10
8.8	4.3	-8.97945e-11
8.9	4.3	-3.24203e-11
9	4.3	-1.11969e-11
4	4.4	0.000318022
4.1	4.4	0.000372875
4.2	4.4	0.000426397
4.3	4.4	0.000476338
4.4	4.4	0.000520765
4.5	4.4	0.000558182
4.6	4.4	0.000587538
4.7	4.4	0.000608181
4.8	4.4	0.000619779
4.9	4.4	0.000622244
5	4.4	0.000615674
5.1	4.4	0.000600333
5.2	4.4	0.000576661
5.3	4.4	0.0005453
5.4	4.4	0.000507136
5.5	4.4	0.000463327
5.6	4.4	0.000415312
5.7	4.4	0.000364777
5.8	4.4	0.000313575
5.9	4.4	0.000263585
6	4.4	0.000216517
6.1	4.4	0.00017372
6.2	4.4	0.000136036
6.3	4.4	0.000103787
6.4	4.4	7.68939e-05
6.5	4.4	5.50482e-05
6.6	4.4	3.78455e-05
6.7	4.4	2.48194e-05
6.8	4.4	1.54194e-05
6.9	4.4	9.0061e-06
7	4.4	4.89827e-06
7.1	4.4	2.44524e-06
7.2	4.4	1.08717e-06
7.3	4.4	3.9018e-07
7.4	4.4	5.76971e-08
7.5	4.4	-8.51499e-08
7.6	4.4	-1.29659e-07
7.7	4.4	-1.23246e-07
7.8	4.4	-9.41184e-08
7.9	4.4	-6.10265e-08
8	4.4	-3.48632e-08
8.1	4.4	-1.863e-08
8.2	4.4	-1.00102e-08
8.3	4.4	-5.54213e-09
8.4	4.4	-3.02326e-09
8.5	4.4	-1.53476e-09
8.6	4.4	-7.05621e-10
8.7	4.4	-2.9422e-10
8.8	4.4	-1.13042e-10
8.9	4.4	-4.08139e-11
9	4.4	-1.40964e-11
4	4.5	0.000329705
4.1	4.5	0.000396371
4.2	4.5	0.000464028
4.3	4.5	0.000529639
4.4	4.5	0.000590307
4.5	4.5	0.000643542
4.6	4.5	0.000687401
4.7	4.5	0.000720519
4.8	4.5	0.000742054
4.9	4.5	0.000751606
5	4.5	0.000749128
5.1	4.5	0.00073488
5.2	4.5	0.000709407
5.3	4.5	0.000673556
5.4	4.5	0.000628502
5.5	4.5	0.000575777
5.6	4.5	0.000517264
5.7	4.5	0.000455162
5.8	4.5	0.00039187
5.9	4.5	0.000329815
6	4.5	0.000271207
6.1	4.5	0.000217791
6.2	4.5	0.000170671
6.3	4.5	0.00013029
6.4	4.5	9.6577e-05
6.5	4.5	6.9167e-05
6.6	4.5	4.75678e-05
6.7	4.5	3.12038e-05
6.8	4.5	1.939e-05
6.9	4.5	1.13273e-05
7	4.5	6.16167e-06
7.1	4.5	3.07632e-06
7.2	4.5	1.36789e-06
7.3	4.5	4.90962e-07
7.4	4.5	7.25895e-08
7.5	4.5	-1.07179e-07
7.6	4.5	-1.63198e-07
7.7	4.5	-1.55128e-07
7.8	4.5	-1.18466e-07
7.9	4.5	-7.68143e-08
8	4.5	-4.38829e-08
8.1	4.5	-2.34503e-08
8.2	4.5	-1.26004e-08
8.3	4.5	-6.97642e-09
8.4	4.5	-3.80575e-09
8.5	4.5	-1.93202e-09
8.6	4.5	-8.88277e-10
8.7	4.5	-3.70385e-10
8.8	4.5	-1.42306e-10
8.9	4.5	-5.13801e-11
9	4.5	-1.77457e-11
4	4.6	0.000332726
4.1	4.6	0.000410554
4.2	4.6	0.000492811
4.3	4.6	0.000575845
4.4	4.6	0.000655751
4.5	4.6	0.000728804
4.6	4.6	0.000791797
4.7	4.6	0.000842229
4.8	4.6	0.000878353
4.9	4.6	0.000899131
5	4.6	0.00090414
5.1	4.6	0.000893493
5.2	4.6	0.000867782
5.3	4.6	0.000828064
5.4	4.6	0.000775864
5.5	4.6	0.000713186
5.6	4.6	0.000642498
5.7	4.6	0.000566663
5.8	4.6	0.000488797
5.9	4.6	0.000412045
6	4.6	0.000339272
6.1	4.6	0.000272751
6.2	4.6	0.000213935
6.3	4.6	0.000163441
6.4	4.6	0.000121225
6.5	4.6	8.68635e-05
6.6	4.6	5.97627e-05
6.7	4.6	3.92167e-05
6.8	4.6	2.4376e-05
6.9	4.6	1.42433e-05
7	4.6	7.74934e-06
7.1	4.6	3.8696e-06
7.2	4.6	1.72084e-06
7.3	4.6	6.17694e-07
7.4	4.6	9.13108e-08
7.5	4.6	-1.349e-07
7.6	4.6	-2.054e-07
7.7	4.6	-1.95246e-07
7.8	4.6	-1.49105e-07
7.9	4.6	-9.66822e-08
8	4.6	-5.52338e-08
8.1	4.6	-2.95167e-08
8.2	4.6	-1.58605e-08
8.3	4.6	-8.78167e-09
8.4	4.6	-4.79068e-09
8.5	4.6	-2.43207e-09
8.6	4.6	-1.1182e-09
8.7	4.6	-4.66262e-10
8.8	4.6	-1.79146e-10
8.9	4.6	-6.46816e-11
9	4.6	-2.23399e-11
4	4.7	0.000326664
4.1	4.7	0.000413852
4.2	4.7	0.000509869
4.3	4.7	0.000610871
4.4	4.7	0.000712151
4.5	4.7	0.000808688
4.6	4.7	0.000895698
4.7	4.7	0.000969072
4.8	4.7	0.00102562
4.9	4.7	0.00106318
5	4.7	0.00108053
5.1	4.7	0.00107737
5.2	4.7	0.00105415
5.3	4.7	0.00101211
5.4	4.7	0.000953133
5.5	4.7	0.000879816
5.6	4.7	0.000795361
5.7	4.7	0.000703494
5.8	4.7	0.000608271
5.9	4.7	0.000513774
6	4.7	0.000423734
6.1	4.7	0.000341122
6.2	4.7	0.00026787
6.3	4.7	0.00020484
6.4	4.7	0.000152049
6.5	4.7	0.000109019
6.6	4.7	7.50447e-05
6.7	4.7	4.92657e-05
6.8	4.7	3.06329e-05
6.9	4.7	1.79045e-05
7	4.7	9.74359e-06
7.1	4.7	4.86638e-06
7.2	4.7	2.16446e-06
7.3	4.7	7.77014e-07
7.4	4.7	1.14836e-07
7.5	4.7	-1.69782e-07
7.6	4.7	-2.58499e-07
7.7	4.7	-2.45723e-07
7.8	4.7	-1.87657e-07
7.9	4.7	-1.21682e-07
8	4.7	-6.95171e-08
8.1	4.7	-3.71505e-08
8.2	4.7	-1.99632e-08
8.3	4.7	-1.10537e-08
8.4	4.7	-6.03033e-09
8.5	4.7	-3.06148e-09
8.6	4.7	-1.40762e-09
8.7	4.7	-5.86949e-10
8.8	4.7	-2.25519e-10
8.9	4.7	-8.14258e-11
9	4.7	-2.81235e-11
4	4.8	0.000312038
4.1	4.8	0.000405758
4.2	4.8	0.000513262
4.3	4.8	0.000631148
4.4	4.8	0.00075443
4.5	4.8	0.000877039
4.6	4.8	0.000992526
4.7	4.8	0.00109477
4.8	4.8	0.00117854
4.9	4.8	0.00123986
5	4.8	0.00127612
5.1	4.8	0.00128607
5.2	4.8	0.00126972
5.3	4.8	0.00122824
5.4	4.8	0.00116391
5.5	4.8	0.00107994
5.6	4.8	0.00098047
5.7	4.8	0.000870312
5.8	4.8	0.000754737
5.9	4.8	0.000639062
6	4.8	0.000528154
6.1	4.8	0.000425917
6.2	4.8	0.000334937
6.3	4.8	0.00025643
6.4	4.8	0.000190528
6.5	4.8	0.000136717
6.6	4.8	9.41724e-05
6.7	4.8	6.18558e-05
6.8	4.8	3.84782e-05
6.9	4.8	2.24981e-05
7	4.8	1.22471e-05
7.1	4.8	6.11824e-06
7.2	4.8	2.72182e-06
7.3	4.8	9.77225e-07
7.4	4.8	1.44384e-07
7.5	4.8	-2.13668e-07
7.6	4.8	-3.25297e-07
7.7	4.8	-3.09226e-07
7.8	4.8	-2.36159e-07
7.9	4.8	-1.53135e-07
8	4.8	-8.74881e-08
8.1	4.8	-4.67558e-08
8.2	4.8	-2.51258e-08
8.3	4.8	-1.3913e-08
8.4	4.8	-7.59052e-09
8.5	4.8	-3.85368e-09
8.6	4.8	-1.7719e-09
8.7	4.8	-7.38863e-10
8.8	4.8	-2.83892e-10
8.9	4.8	-1.02503e-10
9	4.8	-3.5404e-11
4	4.9	0.000290208
4.1	4.9	0.000386953
4.2	4.9	0.000502392
4.3	4.9	0.000634295
4.4	4.9	0.00077818
4.5	4.9	0.000927571
4.6	4.9	0.00107465
4.7	4.9	0.00121115
4.8	4.9	0.0013293
4.9	4.9	0.00142253
5	4.9	0.001486
5.1	4.9	0.00151673
5.2	4.9	0.00151367
5.3	4.9	0.00147759
5.4	4.9	0.00141087
5.5	4.9	0.00131741
5.6	4.9	0.0012024
5.7	4.9	0.00107202
5.8	4.9	0.000933074
5.9	4.9	0.000792496
6	4.9	0.000656646
6.1	4.9	0.000530677
6.2	4.9	0.000418068
6.3	4.9	0.000320551
6.4	4.9	0.000238461
6.5	4.9	0.000171283
6.6	4.9	0.000118078
6.7	4.9	7.76096e-05
6.8	4.9	4.83048e-05
6.9	4.9	2.82565e-05
7	4.9	1.53875e-05
7.1	4.9	7.6895e-06
7.2	4.9	3.42168e-06
7.3	4.9	1.22871e-06
7.4	4.9	1.81475e-07
7.5	4.9	-2.68873e-07
7.6	4.9	-4.09312e-07
7.7	4.9	-3.891e-07
7.8	4.9	-2.97169e-07
7.9	4.9	-1.927e-07
8	4.9	-1.10095e-07
8.1	4.9	-5.88401e-08
8.2	4.9	-3.16215e-08
8.3	4.9	-1.75109e-08
8.4	4.9	-9.55397e-09
8.5	4.9	-4.85071e-09
8.6	4.9	-2.2304e-09
8.7	4.9	-9.30074e-10
8.8	4.9	-3.57368e-10
8.9	4.9	-1.29035e-10
9	4.9	-4.4568e-11
4	5	0.000263104
4.1	5	0.000359167
4.2	5	0.000478155
4.3	5	0.000619627
4.4	5	0.000780505
4.5	5	0.000954875
4.6	5	0.00113433
4.7	5	0.00130881
4.8	5	0.0014678
4.9	5	0.00160151
5	5	0.00170187
5.1	5	0.00176315
5.2	5	0.00178228
5.3	5	0.00175884
5.4	5	0.00169494
5.5	5	0.00159495
5.6	5	0.00146516
5.7	5	0.00131338
5.8	5	0.00114836
5.9	5	0.00097907
6	5	0.000813835
6.1	5	0.000659478
6.2	5	0.000520701
6.3	5	0.000399985
6.4	5	0.000298006
6.5	5	0.000214321
6.6	5	0.000147898
6.7	5	9.72914e-05
6.8	5	6.05968e-05
6.9	5	3.54671e-05
7	5	1.93233e-05
7.1	5	9.66011e-06
7.2	5	4.29993e-06
7.3	5	1.5444e-06
7.4	5	2.27999e-07
7.5	5	-3.38304e-07
7.6	5	-5.14957e-07
7.7	5	-4.89544e-07
7.8	5	-3.73894e-07
7.9	5	-2.42461e-07
8	5	-1.3853e-07
8.1	5	-7.40404e-08
8.2	5	-3.97932e-08
8.3	5	-2.20378e-08
8.4	5	-1.20247e-08
8.5	5	-6.10544e-09
8.6	5	-2.80744e-09
8.7	5	-1.17074e-09
8.8	5	-4.4985e-10
8.9	5	-1.62431e-10
9	5	-5.61041e-11
4	5.1	0.000232882
4.1	5.1	0.000324846
4.2	5.1	0.000442763
4.3	5.1	0.000588331
4.4	5.1	0.000760646
4.5	5.1	0.000955463
4.6	5.1	0.00116498
4.7	5.1	0.00137829
4.8	5.1	0.00158254
4.9	5.1	0.00176445
5	5.1	0.00191188
5.1	5.1	0.00201513
5.2	5.1	0.0020678
5.3	5.1	0.00206717
5.4	5.1	0.00201417
5.5	5.1	0.00191316
5.6	5.1	0.0017714
5.7	5.1	0.00159848
5.8	5.1	0.00140547
5.9	5.1	0.00120393
6	5.1	0.00100472
6.1	5.1	0.000816876
6.2	5.1	0.000646777
6.3	5.1	0.000497982
6.4	5.1	0.000371725
6.5	5.1	0.000267756
6.6	5.1	0.000185009
6.7	5.1	0.000121832
6.8	5.1	7.59474e-05
6.9	5.1	4.44837e-05
7	5.1	2.42502e-05
7.1	5.1	1.21291e-05
7.2	5.1	5.40109e-06
7.3	5.1	1.94042e-06
7.4	5.1	2.86298e-07
7.5	5.1	-4.25602e-07
7.6	5.1	-6.47759e-07
7.7	5.1	-6.15817e-07
7.8	5.1	-4.70358e-07
7.9	5.1	-3.05027e-07
8	5.1	-1.74284e-07
8.1	5.1	-9.31561e-08
8.2	5.1	-5.00715e-08
8.3	5.1	-2.77328e-08
8.4	5.1	-1.51333e-08
8.5	5.1	-7.68432e-09
8.6	5.1	-3.53362e-09
8.7	5.1	-1.47362e-09
8.8	5.1	-5.66251e-10
8.9	5.1	-2.04466e-10
9	5.1	-7.06243e-11
4	5.2	0.000201601
4.1	5.2	0.000286715
4.2	5.2	0.00039932
4.3	5.2	0.000543247
4.4	5.2	0.000720198
4.5	5.2	0.000928549
4.6	5.2	0.00116246
4.7	5.2	0.00141164
4.8	5.2	0.00166204
4.9	5.2	0.00189735
5	5.2	0.00210099
5.1	5.2	0.00225823
5.2	5.2	0.00235781
5.3	5.2	0.00239309
5.4	5.2	0.00236247
5.5	5.2	0.00226928
5.6	5.2	0.00212128
5.7	5.2	0.00192975
5.8	5.2	0.0017084
5.9	5.2	0.00147192
6	5.2	0.0012344
6.1	5.2	0.00100776
6.2	5.2	0.000800677
6.3	5.2	0.000618251
6.4	5.2	0.000462597
6.5	5.2	0.000333861
6.6	5.2	0.000231054
6.7	5.2	0.000152354
6.8	5.2	9.50779e-05
6.9	5.2	5.5739e-05
7	5.2	3.04086e-05
7.1	5.2	1.52187e-05
7.2	5.2	6.78031e-06
7.3	5.2	2.43673e-06
7.4	5.2	3.59266e-07
7.5	5.2	-5.3533e-07
7.6	5.2	-8.14637e-07
7.7	5.2	-7.74505e-07
7.8	5.2	-5.91597e-07
7.9	5.2	-3.83669e-07
8	5.2	-2.1923e-07
8.1	5.2	-1.17189e-07
8.2	5.2	-6.29964e-08
8.3	5.2	-3.48958e-08
8.4	5.2	-1.9044e-08
8.5	5.2	-9.67086e-09
8.6	5.2	-4.4474e-09
8.7	5.2	-1.85479e-09
8.8	5.2	-7.12745e-10
8.9	5.2	-2.57372e-10
9	5.2	-8.8901e-11
4	5.3	0.000170991
4.1	5.3	0.00024737
4.2	5.3	0.00035127
4.3	5.3	0.000488318
4.4	5.3	0.000662813
4.5	5.3	0.000876289
4.6	5.3	0.00112604
4.7	5.3	0.00140406
4.8	5.3	0.00169688
4.9	5.3	0.0019865
5	5.3	0.00225244
5.1	5.3	0.00247441
5.2	5.3	0.00263494
5.3	5.3	0.0027216
5.4	5.3	0.00272831
5.5	5.3	0.00265578
5.6	5.3	0.00251111
5.7	5.3	0.00230682
5.8	5.3	0.0020593
5.9	5.3	0.00178686
6	5.3	0.00150756
6.1	5.3	0.00123705
6.2	5.3	0.000987063
6.3	5.3	0.000764894
6.4	5.3	0.000574011
6.5	5.3	0.000415276
6.6	5.3	0.000287972
6.7	5.3	0.000190198
6.8	5.3	0.000118857
6.9	5.3	6.97577e-05
7	5.3	3.80922e-05
7.1	5.3	1.9079e-05
7.2	5.3	8.50549e-06
7.3	5.3	3.058e-06
7.4	5.3	4.50453e-07
7.5	5.3	-6.73196e-07
7.6	5.3	-1.02423e-06
7.7	5.3	-9.73837e-07
7.8	5.3	-7.43907e-07
7.9	5.3	-4.82476e-07
8	5.3	-2.75707e-07
8.1	5.3	-1.47394e-07
8.2	5.3	-7.92445e-08
8.3	5.3	-4.3903e-08
8.4	5.3	-2.39629e-08
8.5	5.3	-1.21699e-08
8.6	5.3	-5.5971e-09
8.7	5.3	-2.33441e-09
8.8	5.3	-8.97098e-10
8.9	5.3	-3.23955e-10
9	5.3	-1.11904e-10
4	5.4	0.000142338
4.1	5.4	0.000208989
4.2	5.4	0.000301887
4.3	5.4	0.000427898
4.4	5.4	0.000593507
4.5	5.4	0.000803398
4.6	5.4	0.00105866
4.7	5.4	0.00135501
4.8	5.4	0.00168158
4.9	5.4	0.00202084
5	5.4	0.00235002
5.1	5.4	0.0026438
5.2	5.4	0.00287784
5.3	5.4	0.00303217
5.4	5.4	0.00309396
5.5	5.4	0.00305895
5.6	5.4	0.00293177
5.7	5.4	0.00272495
5.8	5.4	0.00245715
5.9	5.4	0.00215051
6	5.4	0.00182775
6.1	5.4	0.00150918
6.2	5.4	0.00121056
6.3	5.4	0.000942233
6.4	5.4	0.000709682
6.5	5.4	0.000514978
6.6	5.4	0.000357999
6.7	5.4	0.000236935
6.8	5.4	0.000148315
6.9	5.4	8.71702e-05
7	5.4	4.76564e-05
7.1	5.4	2.38926e-05
7.2	5.4	1.06598e-05
7.3	5.4	3.83456e-06
7.4	5.4	5.6419e-07
7.5	5.4	-8.46324e-07
7.6	5.4	-1.28732e-06
7.7	5.4	-1.22408e-06
7.8	5.4	-9.35148e-07
7.9	5.4	-6.06556e-07
8	5.4	-3.46641e-07
8.1	5.4	-1.85338e-07
8.2	5.4	-9.96629e-08
8.3	5.4	-5.52261e-08
8.4	5.4	-3.01482e-08
8.5	5.4	-1.53132e-08
8.6	5.4	-7.04341e-09
8.7	5.4	-2.93786e-09
8.8	5.4	-1.12907e-09
8.9	5.4	-4.07746e-10
9	5.4	-1.40854e-10
4	5.5	0.000116469
4.1	5.5	0.000173184
4.2	5.5	0.000253905
4.3	5.5	0.000366108
4.4	5.5	0.000517783
4.5	5.5	0.000716257
4.6	5.5	0.000966417
4.7	5.5	0.00126851
4.8	5.5	0.00161604
4.9	5.5	0.0019944
5	5.5	0.00238108
5.1	5.5	0.00274763
5.2	5.5	0.00306338
5.3	5.5	0.00329993
5.4	5.5	0.00343552
5.5	5.5	0.00345819
5.6	5.5	0.00336733
5.7	5.5	0.00317343
5.8	5.5	0.00289615
5.9	5.5	0.00256117
6	5.5	0.00219627
6.1	5.5	0.00182733
6.2	5.5	0.00147526
6.3	5.5	0.0011545
6.4	5.5	0.000873488
6.5	5.5	0.000636213
6.6	5.5	0.000443644
6.7	5.5	0.00029437
6.8	5.5	0.00018466
6.9	5.5	0.000108723
7	5.5	5.95266e-05
7.1	5.5	2.98802e-05
7.2	5.5	1.33445e-05
7.3	5.5	4.80341e-06
7.4	5.5	7.05706e-07
7.5	5.5	-1.06359e-06
7.6	5.5	-1.6173e-06
7.7	5.5	-1.538e-06
7.8	5.5	-1.17511e-06
7.9	5.5	-7.62272e-07
8	5.5	-4.35678e-07
8.1	5.5	-2.3298e-07
8.2	5.5	-1.2531e-07
8.3	5.5	-6.9455e-08
8.4	5.5	-3.79238e-08
8.5	5.5	-1.92658e-08
8.6	5.5	-8.86251e-09
8.7	5.5	-3.69698e-09
8.8	5.5	-1.42093e-09
8.9	5.5	-5.1318e-10
9	5.5	-1.77285e-10
4	5.6	9.38078e-05
4.1	5.6	0.000140986
4.2	5.6	0.00020934
4.3	5.6	0.000306373
4.4	5.6	0.000440811
4.5	5.6	0.000621799
4.6	5.6	0.000857411
4.7	5.6	0.00115244
4.8	5.6	0.00150575
4.9	5.6	0.00190782
5	5.6	0.00233931
5.1	5.6	0.00277172
5.2	5.6	0.0031702
5.3	5.6	0.00349847
5.4	5.6	0.00372459
5.5	5.6	0.00382626
5.6	5.6	0.00379436
5.7	5.6	0.00363417
5.8	5.6	0.00336407
5.9	5.6	0.00301204
6	5.6	0.00261075
6.1	5.6	0.00219232
6.2	5.6	0.00178389
6.3	5.6	0.00140531
6.4	5.6	0.00106915
6.5	5.6	0.00078232
6.6	5.6	0.000547615
6.7	5.6	0.000364513
6.8	5.6	0.000229266
6.9	5.6	0.000135283
7	5.6	7.42045e-05
7.1	5.6	3.73048e-05
7.2	5.6	1.6681e-05
7.3	5.6	6.00934e-06
7.4	5.6	8.81244e-07
7.5	5.6	-1.33603e-06
7.6	5.6	-2.03079e-06
7.7	5.6	-1.93145e-06
7.8	5.6	-1.47593e-06
7.9	5.6	-9.57528e-07
8	5.6	-5.4735e-07
8.1	5.6	-2.92755e-07
8.2	5.6	-1.57505e-07
8.3	5.6	-8.73271e-08
8.4	5.6	-4.76949e-08
8.5	5.6	-2.42345e-08
8.6	5.6	-1.11499e-08
8.7	5.6	-4.65174e-09
8.8	5.6	-1.78807e-09
8.9	5.6	-6.4583e-10
9	5.6	-2.23126e-10
4	5.7	7.44591e-05
4.1	5.7	0.000112912
4.2	5.7	0.000169463
4.3	5.7	0.000251193
4.4	5.7	0.000366857
4.5	5.7	0.000526486
4.6	5.7	0.000740344
4.7	5.7	0.00101705
4.8	5.7	0.00136086
4.9	5.7	0.00176854
5	5.7	0.00222657
5.1	5.7	0.00270985
5.2	5.7	0.00318293
5.3	5.7	0.00360407
5.4	5.7	0.00393168
5.5	5.7	0.00413144
5.6	5.7	0.00418254
5.7	5.7	0.00408118
5.8	5.7	0.00384094
5.9	5.7	0.00348958
6	5.7	0.00306354
6.1	5.7	0.00260117
6.2	5.7	0.00213676
6.3	5.7	0.0016969
6.4	5.7	0.00129975
6.5	5.7	0.000956437
6.6	5.7	0.000672653
6.7	5.7	0.000449505
6.8	5.7	0.000283653
6.9	5.7	0.000167835
7	5.7	9.22699e-05
7.1	5.7	4.64755e-05
7.2	5.7	2.08141e-05
7.3	5.7	7.50595e-06
7.4	5.7	1.09813e-06
7.5	5.7	-1.6773e-06
7.6	5.7	-2.54828e-06
7.7	5.7	-2.42402e-06
7.8	5.7	-1.85265e-06
7.9	5.7	-1.20211e-06
8	5.7	-6.87277e-07
8.1	5.7	-3.67688e-07
8.2	5.7	-1.97891e-07
8.3	5.7	-1.09762e-07
8.4	5.7	-5.99678e-08
8.5	5.7	-3.04783e-08
8.6	5.7	-1.40253e-08
8.7	5.7	-5.85226e-09
8.8	5.7	-2.24982e-09
8.9	5.7	-8.12695e-10
9	5.7	-2.80801e-10
4	5.8	5.83044e-05
4.1	5.8	8.90737e-05
4.2	5.8	0.000134893
4.3	5.8	0.00020212
4.4	5.8	0.000298992
4.5	5.8	0.00043558
4.6	5.8	0.00062322
4.7	5.8	0.000873162
4.8	5.8	0.00119422
4.9	5.8	0.00158954
5	5.8	0.00205287
5.1	5.8	0.00256564
5.2	5.8	0.00309592
5.3	5.8	0.00360062
5.4	5.8	0.00403115
5.5	5.8	0.0043416
5.6	5.8	0.00449728
5.7	5.8	0.00448152
5.8	5.8	0.00429863
5.9	5.8	0.00397228
6	5.8	0.00354007
6.1	5.8	0.00304551
6.2	5.8	0.00253034
6.3	5.8	0.00202904
6.4	5.8	0.00156696
6.5	5.8	0.00116103
6.6	5.8	0.000821265
6.7	5.8	0.000551479
6.8	5.8	0.000349417
6.9	5.8	0.000207451
7	5.8	0.000114375
7.1	5.8	5.77469e-05
7.2	5.8	2.59122e-05
7.3	5.8	9.35639e-06
7.4	5.8	1.36476e-06
7.5	5.8	-2.10424e-06
7.6	5.8	-3.19495e-06
7.7	5.8	-3.03975e-06
7.8	5.8	-2.32377e-06
7.9	5.8	-1.50809e-06
8	5.8	-8.62395e-07
8.1	5.8	-4.61519e-07
8.2	5.8	-2.48503e-07
8.3	5.8	-1.37902e-07
8.4	5.8	-7.5374e-08
8.5	5.8	-3.83206e-08
8.6	5.8	-1.76384e-08
8.7	5.8	-7.36134e-09
8.8	5.8	-2.83042e-09
8.9	5.8	-1.02256e-09
9	5.8	-3.5335e-10
4	5.9	4.50828e-05
4.1	5.9	6.92982e-05
4.2	5.9	0.000105733
4.3	5.9	0.000159867
4.4	5.9	0.00023907
4.5	5.9	0.000352799
4.6	5.9	0.000512455
4.7	5.9	0.000730594
4.8	5.9	0.00101919
4.9	5.9	0.00138678
5	5.9	0.00183455
5.1	5.9	0.00235227
5.2	5.9	0.00291519
5.3	5.9	0.00348368
5.4	5.9	0.00400679
5.5	5.9	0.00442984
5.6	5.9	0.00470448
5.7	5.9	0.00479845
5.8	5.9	0.00470227
5.9	5.9	0.00443053
6	5.9	0.00401776
6.1	5.9	0.00351007
6.2	5.9	0.00295575
6.3	5.9	0.00239775
6.4	5.9	0.00187004
6.5	5.9	0.00139719
6.6	5.9	0.00099529
6.7	5.9	0.000672313
6.8	5.9	0.000428113
6.9	5.9	0.000255245
7	5.9	0.000141223
7.1	5.9	7.1514e-05
7.2	5.9	3.21676e-05
7.3	5.9	1.16336e-05
7.4	5.9	1.69045e-06
7.5	5.9	-2.63746e-06
7.6	5.9	-4.00151e-06
7.7	5.9	-3.80807e-06
7.8	5.9	-2.91192e-06
7.9	5.9	-1.89025e-06
8	5.9	-1.08121e-06
8.1	5.9	-5.7885e-07
8.2	5.9	-3.11857e-07
8.3	5.9	-1.73167e-07
8.4	5.9	-9.46989e-08
8.5	5.9	-4.81648e-08
8.6	5.9	-2.21764e-08
8.7	5.9	-9.25752e-09
8.8	5.9	-3.56021e-09
8.9	5.9	-1.28643e-09
9	5.9	-4.44593e-10
4	6	3.44557e-05
4.1	6	5.32303e-05
4.2	6	8.17205e-05
4.3	6	0.000124495
4.4	6	0.000187878
4.5	6	0.000280301
4.6	6	0.000412462
4.7	6	0.000597033
4.8	6	0.000847597
4.9	6	0.00117645
5	6	0.00159114
5.1	6	0.00209002
5.2	6	0.00265771
5.3	6	0.00326232
5.4	6	0.00385604
5.5	6	0.00438056
5.6	6	0.00477679
5.7	6	0.00499673
5.8	6	0.00501379
5.9	6	0.00482827
6	6	0.00446614
6.1	6	0.00397171
6.2	6	0.00339731
6.3	6	0.00279379
6.4	6	0.00220461
6.5	6	0.00166373
6.6	6	0.00119528
6.7	6	0.000813262
6.8	6	0.000521049
6.9	6	0.000312267
7	6	0.00017353
7.1	6	8.81977e-05
7.2	6	3.97917e-05
7.3	6	1.44194e-05
7.4	6	2.08503e-06
7.5	6	-3.30206e-06
7.6	6	-5.00504e-06
7.7	6	-4.76455e-06
7.8	6	-3.64458e-06
7.9	6	-2.36656e-06
8	6	-1.35411e-06
8.1	6	-7.2531e-07
8.2	6	-3.91042e-07
8.3	6	-2.17307e-07
8.4	6	-1.18916e-07
8.5	6	-6.05126e-08
8.6	6	-2.78725e-08
8.7	6	-1.16389e-08
8.8	6	-4.47718e-09
8.9	6	-1.6181e-09
9	6	-5.59316e-10
4	6.1	2.60546e-05
4.1	6.1	4.04178e-05
4.2	6.1	6.23663e-05
4.3	6.1	9.5604e-05
4.4	6.1	0.000145377
4.5	6.1	0.000218894
4.6	6.1	0.000325667
4.7	6.1	0.000477592
4.8	6.1	0.000688465
4.9	6.1	0.000972565
5	6.1	0.00134194
5.1	6.1	0.00180231
5.2	6.1	0.0023481
5.3	6.1	0.00295776
5.4	6.1	0.00359155
5.5	6.1	0.0041937
5.6	6.1	0.00469991
5.7	6.1	0.00504934
5.8	6.1	0.00519768
5.9	6.1	0.00512697
6	6.1	0.00484876
6.1	6.1	0.00439971
6.2	6.1	0.0038318
6.3	6.1	0.00320144
6.4	6.1	0.00256135
6.5	6.1	0.00195604
6.6	6.1	0.0014197
6.7	6.1	0.00097443
6.8	6.1	0.000628985
6.9	6.1	0.000379354
7	6.1	0.000211948
7.1	6.1	0.000108216
7.2	6.1	4.9006e-05
7.3	6.1	1.78018e-05
7.4	6.1	2.55802e-06
7.5	6.1	-4.12826e-06
7.6	6.1	-6.24986e-06
7.7	6.1	-5.95182e-06
7.8	6.1	-4.55474e-06
7.9	6.1	-2.95867e-06
8	6.1	-1.69361e-06
8.1	6.1	-9.07721e-07
8.2	6.1	-4.89828e-07
8.3	6.1	-2.72472e-07
8.4	6.1	-1.49229e-07
8.5	6.1	-7.59859e-08
8.6	6.1	-3.50166e-08
8.7	6.1	-1.46279e-08
8.8	6.1	-5.62875e-09
8.9	6.1	-2.03482e-09
9	6.1	-7.03513e-10
4	6.2	1.95139e-05
4.1	6.2	3.03732e-05
4.2	6.2	4.70624e-05
4.3	6.2	7.25146e-05
4.4	6.2	0.000110962
4.5	6.2	0.000168358
4.6	6.2	0.000252809
4.7	6.2	0.000374876
4.8	6.2	0.000547539
4.9	6.2	0.000785456
5	6.2	0.00110312
5.1	6.2	0.00151159
5.2	6.2	0.00201378
5.3	6.2	0.00259909
5.4	6.2	0.00323897
5.5	6.2	0.00388573
5.6	6.2	0.00447662
5.7	6.2	0.00494378
5.8	6.2	0.0052279
5.9	6.2	0.00529157
6	6.2	0.00512734
6.1	6.2	0.0047579
6.2	6.2	0.00422882
6.3	6.2	0.00359781
6.4	6.2	0.00292482
6.5	6.2	0.00226497
6.6	6.2	0.00166394
6.7	6.2	0.00115409
6.8	6.2	0.000751708
6.9	6.2	0.00045689
7	6.2	0.000256957
7.1	6.2	0.000131934
7.2	6.2	6.00235e-05
7.3	6.2	2.18699e-05
7.4	6.2	3.11718e-06
7.5	6.2	-5.15195e-06
7.6	6.2	-7.78806e-06
7.7	6.2	-7.42017e-06
7.8	6.2	-5.68148e-06
7.9	6.2	-3.6923e-06
8	6.2	-2.11465e-06
8.1	6.2	-1.13427e-06
8.2	6.2	-6.12774e-07
8.3	6.2	-3.41286e-07
8.4	6.2	-1.87114e-07
8.5	6.2	-9.53527e-08
8.6	6.2	-4.39684e-08
8.7	6.2	-1.83764e-08
8.8	6.2	-7.074e-09
8.9	6.2	-2.55814e-09
9	6.2	-8.84684e-10
4	6.3	1.44919e-05
4.1	6.3	2.26181e-05
4.2	6.3	3.51651e-05
4.3	6.3	5.44106e-05
4.4	6.3	8.36903e-05
4.5	6.3	0.000127786
4.6	6.3	0.000193369
4.7	6.3	0.000289418
4.8	6.3	0.000427458
4.9	6.3	0.000621342
5	6.3	0.000886196
5.1	6.3	0.0012361
5.2	6.3	0.00168022
5.3	6.3	0.0022176
5.4	6.3	0.0028317
5.5	6.3	0.00348653
5.6	6.3	0.0041271
5.7	6.3	0.00468569
5.8	6.3	0.00509391
5.9	6.3	0.00529734
6	6.3	0.00526781
6.1	6.3	0.00500887
6.2	6.3	0.0045531
6.3	6.3	0.00395348
6.4	6.3	0.00327306
6.5	6.3	0.00257587
6.6	6.3	0.00191939
6.7	6.3	0.00134792
6.8	6.3	0.000887498
6.9	6.3	0.000544488
7	6.3	0.000308693
7.1	6.3	0.000159591
7.2	6.3	7.302e-05
7.3	6.3	2.67037e-05
7.4	6.3	3.76623e-06
7.5	6.3	-6.4151e-06
7.6	6.3	-9.6796e-06
7.7	6.3	-9.22775e-06
7.8	6.3	-7.07022e-06
7.9	6.3	-4.59747e-06
8	6.3	-2.63477e-06
8.1	6.3	-1.41465e-06
8.2	6.3	-7.65332e-07
8.3	6.3	-4.26921e-07
8.4	6.3	-2.34374e-07
8.5	6.3	-1.19556e-07
8.6	6.3	-5.51713e-08
8.7	6.3	-2.30728e-08
8.8	6.3	-8.8864e-09
8.9	6.3	-3.21489e-09
9	6.3	-1.11219e-09
4	6.4	1.0683e-05
4.1	6.4	1.67104e-05
4.2	6.4	2.60517e-05
4.3	6.4	4.04474e-05
4.4	6.4	6.24763e-05
4.5	6.4	9.58918e-05
4.6	6.4	0.000146033
4.7	6.4	0.000220268
4.8	6.4	0.000328383
4.9	6.4	0.000482698
5	6.4	0.000697622
5.1	6.4	0.000988216
5.2	6.4	0.00136735
5.3	6.4	0.00184133
5.4	6.4	0.00240432
5.5	6.4	0.00303321
5.6	6.4	0.00368483
5.7	6.4	0.00429835
5.8	6.4	0.00480382
5.9	6.4	0.00513564
6	6.4	0.00524697
6.1	6.4	0.00511999
6.2	6.4	0.00476876
6.3	6.4	0.0042348
6.4	6.4	0.00357832
6.5	6.4	0.00286836
6.6	6.4	0.00217272
6.7	6.4	0.00154821
6.8	6.4	0.00103253
6.9	6.4	0.000640601
7	6.4	0.00036673
7.1	6.4	0.00019119
7.2	6.4	8.80885e-05
7.3	6.4	3.23596e-05
7.4	6.4	4.50125e-06
7.5	6.4	-7.96554e-06
7.6	6.4	-1.19915e-05
7.7	6.4	-1.14399e-05
7.8	6.4	-8.77237e-06
7.9	6.4	-5.70841e-06
8	6.4	-3.27407e-06
8.1	6.4	-1.76007e-06
8.2	6.4	-9.53915e-07
8.3	6.4	-5.33164e-07
8.4	6.4	-2.93188e-07
8.5	6.4	-1.49747e-07
8.6	6.4	-6.91702e-08
8.7	6.4	-2.89496e-08
8.8	6.4	-1.11569e-08
8.9	6.4	-4.03843e-09
9	6.4	-1.3977e-09
4	6.5	7.82419e-06
4.1	6.5	1.22604e-05
4.2	6.5	1.91567e-05
4.3	6.5	2.98247e-05
4.4	6.5	4.62265e-05
4.5	6.5	7.12524e-05
4.6	6.5	0.000109077
4.7	6.5	0.000165581
4.8	6.5	0.000248777
4.9	6.5	0.000369124
5	6.5	0.000539481
5.1	6.5	0.00077437
5.2	6.5	0.00108811
5.3	6.5	0.00149147
5.4	6.5	0.00198689
5.5	6.5	0.0025629
5.6	6.5	0.00318969
5.7	6.5	0.00381794
5.8	6.5	0.00438326
5.9	6.5	0.00481655
6	6.5	0.00505792
6.1	6.5	0.00506985
6.2	6.5	0.00484521
6.3	6.5	0.00440822
6.4	6.5	0.00380949
6.5	6.5	0.0031172
6.6	6.5	0.00240579
6.7	6.5	0.00174342
6.8	6.5	0.00118034
6.9	6.5	0.000742096
7	6.5	0.000429812
7.1	6.5	0.000226358
7.2	6.5	0.000105178
7.3	6.5	3.88475e-05
7.4	6.5	5.30575e-06
7.5	6.5	-9.85599e-06
7.6	6.5	-1.47955e-05
7.7	6.5	-1.41272e-05
7.8	6.5	-1.0844e-05
7.9	6.5	-7.06272e-06
8	6.5	-4.0549e-06
8.1	6.5	-2.18319e-06
8.2	6.5	-1.18591e-06
8.3	6.5	-6.64474e-07
8.4	6.5	-3.6616e-07
8.5	6.5	-1.87314e-07
8.6	6.5	-8.66287e-08
8.7	6.5	-3.62918e-08
8.8	6.5	-1.39977e-08
8.9	6.5	-5.07005e-09
9	6.5	-1.75569e-09
4	6.6	5.69612e-06
4.1	6.6	8.93855e-06
4.2	6.6	1.39913e-05
4.3	6.6	2.18314e-05
4.4	6.6	3.39312e-05
4.5	6.6	5.24807e-05
4.6	6.6	8.0682e-05
4.7	6.6	0.000123117
4.8	6.6	0.000186162
4.9	6.6	0.000278367
5	6.6	0.000410653
5.1	6.6	0.000596054
5.2	6.6	0.00084863
5.3	6.6	0.00118116
5.4	6.6	0.00160138
5.5	6.6	0.00210701
5.6	6.6	0.00268061
5.7	6.6	0.00328624
5.8	6.6	0.0038702
5.9	6.6	0.00436735
6	6.6	0.00471243
6.1	6.6	0.0048535
6.2	6.6	0.00476342
6.3	6.6	0.00444606
6.4	6.6	0.00393638
6.5	6.6	0.00329481
6.6	6.6	0.00259673
6.7	6.6	0.00191827
6.8	6.6	0.0013215
6.9	6.6	0.000843897
7	6.6	0.00049558
7.1	6.6	0.000264185
7.2	6.6	0.000124013
7.3	6.6	4.61015e-05
7.4	6.6	6.14392e-06
7.5	6.6	-1.21417e-05
7.6	6.6	-1.81633e-05
7.7	6.6	-1.73612e-05
7.8	6.6	-1.33428e-05
7.9	6.6	-8.69961e-06
8	6.6	-5.00089e-06
8.1	6.6	-2.69772e-06
8.2	6.6	-1.46957e-06
8.3	6.6	-8.25977e-07
8.4	6.6	-4.56355e-07
8.5	6.6	-2.33921e-07
8.6	6.6	-1.08349e-07
8.7	6.6	-4.54466e-08
8.8	6.6	-1.75463e-08
8.9	6.6	-6.36066e-09
9	6.6	-2.20412e-09
4	6.7	4.12176e-06
4.1	6.7	6.47538e-06
4.2	6.7	1.01502e-05
4.3	6.7	1.58662e-05
4.4	6.7	2.47147e-05
4.5	6.7	3.83313e-05
4.6	6.7	5.91311e-05
4.7	6.7	9.06132e-05
4.8	6.7	0.000137726
4.9	6.7	0.000207249
5	6.7	0.000308098
5.1	6.7	0.000451351
5.2	6.7	0.00064973
5.3	6.7	0.000916143
5.4	6.7	0.00126098
5.5	6.7	0.0016881
5.6	6.7	0.00219
5.7	6.7	0.00274349
5.8	6.7	0.00330788
5.9	6.7	0.00382752
6	6.7	0.00423939
6.1	6.7	0.00448466
6.2	6.7	0.00452102
6.3	6.7	0.00433264
6.4	6.7	0.00393528
6.5	6.7	0.00337537
6.6	6.7	0.00272233
6.7	6.7	0.00205482
6.8	6.7	0.00144393
6.9	6.7	0.000938855
7	6.7	0.000560368
7.1	6.7	0.000303063
7.2	6.7	0.000144007
7.3	6.7	5.39429e-05
7.4	6.7	6.95269e-06
7.5	6.7	-1.4876e-05
7.6	6.7	-2.21587e-05
7.7	6.7	-2.12068e-05
7.8	6.7	-1.63226e-05
7.9	6.7	-1.06565e-05
8	6.7	-6.13514e-06
8.1	6.7	-3.31759e-06
8.2	6.7	-1.8137e-06
8.3	6.7	-1.0234e-06
8.4	6.7	-5.67303e-07
8.5	6.7	-2.9152e-07
8.6	6.7	-1.35287e-07
8.7	6.7	-5.6833e-08
8.8	6.7	-2.19702e-08
8.9	6.7	-7.97265e-09
9	6.7	-2.76508e-09
4	6.8	2.9623e-06
4.1	6.8	4.65805e-06
4.2	6.8	7.30979e-06
4.3	6.8	1.14423e-05
4.4	6.8	1.78551e-05
4.5	6.8	2.77532e-05
4.6	6.8	4.29298e-05
4.7	6.8	6.60085e-05
4.8	6.8	0.000100747
4.9	6.8	0.00015238
5	6.8	0.000227946
5.1	6.8	0.000336466
5.2	6.8	0.000488771
5.3	6.8	0.000696677
5.4	6.8	0.000971191
5.5	6.8	0.00131952
5.6	6.8	0.00174108
5.7	6.8	0.00222318
5.8	6.8	0.00273788
5.9	6.8	0.00324177
6	6.8	0.00367994
6.1	6.8	0.00399426
6.2	6.8	0.00413438
6.3	6.8	0.00406903
6.4	6.8	0.0037948
6.5	6.8	0.00334009
6.6	6.8	0.00276189
6.7	6.8	0.00213474
6.8	6.8	0.00153384
6.9	6.8	0.00101804
7	6.8	0.000619173
7.1	6.8	0.000340586
7.2	6.8	0.000164184
7.3	6.8	6.20421e-05
7.4	6.8	7.63345e-06
7.5	6.8	-1.8103e-05
7.6	6.8	-2.68251e-05
7.7	6.8	-2.57105e-05
7.8	6.8	-1.98243e-05
7.9	6.8	-1.29631e-05
8	6.8	-7.47708e-06
8.1	6.8	-4.05546e-06
8.2	6.8	-2.22706e-06
8.3	6.8	-1.26285e-06
8.4	6.8	-7.02948e-07
8.5	6.8	-3.6236e-07
8.6	6.8	-1.68567e-07
8.7	6.8	-7.09504e-08
8.8	6.8	-2.74711e-08
8.9	6.8	-9.98192e-09
9	6.8	-3.46568e-09
4	6.9	2.11179e-06
4.1	6.9	3.323e-06
4.2	6.9	5.21932e-06
4.3	6.9	8.17904e-06
4.4	6.9	1.27805e-05
4.5	6.9	1.98997e-05
4.6	6.9	3.08477e-05
4.7	6.9	4.75576e-05
4.8	6.9	7.28251e-05
4.9	6.9	0.000110596
5	6.9	0.000166268
5.1	6.9	0.000246919
5.2	6.9	0.000361336
5.3	6.9	0.000519605
5.4	6.9	0.000731997
5.5	6.9	0.00100691
5.6	6.9	0.00134783
5.7	6.9	0.00174963
5.8	6.9	0.00219514
5.9	6.9	0.00265338
6	6.9	0.00308067
6.1	6.9	0.00342554
6.2	6.9	0.00363697
6.3	6.9	0.00367479
6.4	6.9	0.00351999
6.5	6.9	0.0031823
6.6	6.9	0.00270187
6.7	6.9	0.00214264
6.8	6.9	0.00157775
6.9	6.9	0.00107167
7	6.9	0.000665956
7.1	6.9	0.00037358
7.2	6.9	0.000183134
7.3	6.9	6.98873e-05
7.4	6.9	8.04571e-06
7.5	6.9	-2.18465e-05
7.6	6.9	-3.21674e-05
7.7	6.9	-3.08827e-05
7.8	6.9	-2.3862e-05
7.9	6.9	-1.56327e-05
8	6.9	-9.03746e-06
8.1	6.9	-4.92022e-06
8.2	6.9	-2.71723e-06
8.3	6.9	-1.55038e-06
8.4	6.9	-8.67507e-07
8.5	6.9	-4.48952e-07
8.6	6.9	-2.0948e-07
8.7	6.9	-8.8384e-08
8.8	6.9	-3.42893e-08
8.9	6.9	-1.24799e-08
9	6.9	-4.33883e-09
4	7	1.49089e-06
4.1	7	2.34725e-06
4.2	7	3.68923e-06
4.3	7	5.78618e-06
4.4	7	9.05103e-06
4.5	7	1.41115e-05
4.6	7	2.19112e-05
4.7	7	3.38498e-05
4.8	7	5.19668e-05
4.9	7	7.91695e-05
5	7	0.000119486
5.1	7	0.000178294
5.2	7	0.000262436
5.3	7	0.000380057
5.4	7	0.000539968
5.5	7	0.000750303
5.6	7	0.00101637
5.7	7	0.00133777
5.8	7	0.00170539
5.9	7	0.00209899
6	7	0.00248666
6.1	7	0.00282694
6.2	7	0.00307401
6.3	7	0.00318575
6.4	7	0.00313339
6.5	7	0.0029108
6.6	7	0.00254009
6.7	7	0.00206993
6.8	7	0.00156524
6.9	7	0.00109067
7	7	0.000694362
7.1	7	0.000398342
7.2	7	0.00019906
7.3	7	7.67776e-05
7.4	7	8.00655e-06
7.5	7	-2.60954e-05
7.6	7	-3.81286e-05
7.7	7	-3.66739e-05
7.8	7	-2.84046e-05
7.9	7	-1.86494e-05
8	7	-1.0811e-05
8.1	7	-5.91329e-06
8.2	7	-3.28893e-06
8.3	7	-1.89127e-06
8.4	7	-1.06518e-06
8.5	7	-5.53978e-07
8.6	7	-2.59463e-07
8.7	7	-1.09805e-07
8.8	7	-4.27059e-08
8.9	7	-1.55753e-08
9	7	-5.42422e-09
4	7.1	1.04076e-06
4.1	7.1	1.63922e-06
4.2	7.1	2.57771e-06
4.3	7.1	4.04543e-06
4.4	7.1	6.33308e-06
4.5	7.1	9.88369e-06
4.6	7.1	1.53657e-05
4.7	7.1	2.37746e-05
4.8	7.1	3.65695e-05
4.9	7.1	5.58457e-05
5	7.1	8.45344e-05
5.1	7.1	0.000126602
5.2	7.1	0.000187186
5.3	7.1	0.000272571
5.4	7.1	0.00038984
5.5	7.1	0.000546055
5.6	7.1	0.000746814
5.7	7.1	0.0009942
5.8	7.1	0.00128437
5.9	7.1	0.00160533
6	7.1	0.00193557
6.1	7.1	0.00224442
6.2	7.1	0.00249469
6.3	7.1	0.00264789
6.4	7.1	0.00267189
6.5	7.1	0.00254988
6.6	7.1	0.002288
6.7	7.1	0.001918
6.8	7.1	0.00149186
6.9	7.1	0.00106875
7	7.1	0.00069888
7.1	7.1	0.000411151
7.2	7.1	0.00020994
7.3	7.1	8.18576e-05
7.4	7.1	7.30067e-06
7.5	7.1	-3.07849e-05
7.6	7.1	-4.45624e-05
7.7	7.1	-4.29455e-05
7.8	7.1	-3.33507e-05
7.9	7.1	-2.19511e-05
8	7.1	-1.27664e-05
8.1	7.1	-7.0233e-06
8.2	7.1	-3.94134e-06
8.3	7.1	-2.28878e-06
8.4	7.1	-1.29967e-06
8.5	7.1	-6.80107e-07
8.6	7.1	-3.20046e-07
8.7	7.1	-1.35957e-07
8.8	7.1	-5.30425e-08
8.9	7.1	-1.93953e-08
9	7.1	-6.76895e-09
4	7.2	7.17608e-07
4.1	7.2	1.13058e-06
4.2	7.2	1.77849e-06
4.3	7.2	2.79241e-06
4.4	7.2	4.37397e-06
4.5	7.2	6.83108e-06
4.6	7.2	1.06294e-05
4.7	7.2	1.64647e-05
4.8	7.2	2.5361e-05
4.9	7.2	3.87963e-05
5	7.2	5.88535e-05
5.1	7.2	8.83777e-05
5.2	7.2	0.000131104
5.3	7.2	0.000191689
5.4	7.2	0.000275539
5.5	7.2	0.000388323
5.6	7.2	0.000535054
5.7	7.2	0.000718705
5.8	7.2	0.000938474
5.9	7.2	0.00118797
6	7.2	0.0014538
6.1	7.2	0.00171497
6.2	7.2	0.00194384
6.3	7.2	0.00210892
6.4	7.2	0.00218
6.5	7.2	0.0021354
6.6	7.2	0.0019698
6.7	7.2	0.00169943
6.8	7.2	0.00136127
6.9	7.2	0.00100442
7	7.2	0.000676235
7.1	7.2	0.000409006
7.2	7.2	0.000213829
7.3	7.2	8.42104e-05
7.4	7.2	5.70564e-06
7.5	7.2	-3.57782e-05
7.6	7.2	-5.12064e-05
7.7	7.2	-4.94394e-05
7.8	7.2	-3.8502e-05
7.9	7.2	-2.541e-05
8	7.2	-1.48342e-05
8.1	7.2	-8.21923e-06
8.2	7.2	-4.66462e-06
8.3	7.2	-2.74245e-06
8.4	7.2	-1.57334e-06
8.5	7.2	-8.2968e-07
8.6	7.2	-3.9274e-07
8.7	7.2	-1.67629e-07
8.8	7.2	-6.56547e-08
8.9	7.2	-2.40848e-08
9	7.2	-8.42808e-09
4	7.3	4.88475e-07
4.1	7.3	7.69729e-07
4.2	7.3	1.21114e-06
4.3	7.3	1.90219e-06
4.4	7.3	2.98068e-06
4.5	7.3	4.65732e-06
4.6	7.3	7.2513e-06
4.7	7.3	1.12406e-05
4.8	7.3	1.73304e-05
4.9	7.3	2.65428e-05
5	7.3	4.03247e-05
5.1	7.3	6.06658e-05
5.2	7.3	9.02026e-05
5.3	7.3	0.000132265
5.4	7.3	0.000190801
5.5	7.3	0.000270091
5.6	7.3	0.000374185
5.7	7.3	0.000506009
5.8	7.3	0.000666197
5.9	7.3	0.000851781
6	7.3	0.001055
6.1	7.3	0.0012625
6.2	7.3	0.00145527
6.3	7.3	0.00160985
6.4	7.3	0.00170121
6.5	7.3	0.00170779
6.6	7.3	0.00161804
6.7	7.3	0.00143641
6.8	7.3	0.00118558
6.9	7.3	0.000902217
7	7.3	0.000626594
7.1	7.3	0.000390449
7.2	7.3	0.000209277
7.3	7.3	8.30127e-05
7.4	7.3	3.03397e-06
7.5	7.3	-4.08524e-05
7.6	7.3	-5.76645e-05
7.7	7.3	-5.57537e-05
7.8	7.3	-4.35386e-05
7.9	7.3	-2.8813e-05
8	7.3	-1.68932e-05
8.1	7.3	-9.44253e-06
8.2	7.3	-5.43537e-06
8.3	7.3	-3.2457e-06
8.4	7.3	-1.8861e-06
8.5	7.3	-1.0042e-06
8.6	7.3	-4.78855e-07
8.7	7.3	-2.05593e-07
8.8	7.3	-8.09171e-08
8.9	7.3	-2.9804e-08
9	7.3	-1.04643e-08
4	7.4	3.28283e-07
4.1	7.4	5.1736e-07
4.2	7.4	8.14164e-07
4.3	7.4	1.27893e-06
4.4	7.4	2.00451e-06
4.5	7.4	3.13294e-06
4.6	7.4	4.87965e-06
4.7	7.4	7.56757e-06
4.8	7.4	1.16741e-05
4.9	7.4	1.78926e-05
5	7.4	2.72077e-05
5.1	7.4	4.09788e-05
5.2	7.4	6.10183e-05
5.3	7.4	8.96347e-05
5.4	7.4	0.000129601
5.5	7.4	0.000183993
5.6	7.4	0.000255843
5.7	7.4	0.000347586
5.8	7.4	0.00046031
5.9	7.4	0.000592885
6	7.4	0.000741105
6.1	7.4	0.000896969
6.2	7.4	0.0010483
6.3	7.4	0.00117898
6.4	7.4	0.00127033
6.5	7.4	0.00130406
6.6	7.4	0.00126699
6.7	7.4	0.00115637
6.8	7.4	0.000983421
6.9	7.4	0.0007724
7	7.4	0.000554081
7.1	7.4	0.000356179
7.2	7.4	0.00019574
7.3	7.4	7.77269e-05
7.4	7.4	-8.12679e-07
7.5	7.4	-4.56969e-05
7.6	7.4	-6.34116e-05
7.7	7.4	-6.13386e-05
7.8	7.4	-4.80079e-05
7.9	7.4	-3.18493e-05
8	7.4	-1.87609e-05
8.1	7.4	-1.05997e-05
8.2	7.4	-6.21184e-06
8.3	7.4	-3.78287e-06
8.4	7.4	-2.23382e-06
8.5	7.4	-1.20361e-06
8.6	7.4	-5.79202e-07
8.7	7.4	-2.50507e-07
8.8	7.4	-9.91941e-08
8.9	7.4	-3.67208e-08
9	7.4	-1.29468e-08
4	7.5	2.17932e-07
4.1	7.5	3.43469e-07
4.2	7.5	5.40548e-07
4.3	7.5	8.49191e-07
4.4	7.5	1.3311e-06
4.5	7.5	2.0807e-06
4.6	7.5	3.24128e-06
4.7	7.5	5.02776e-06
4.8	7.5	7.75813e-06
4.9	7.5	1.18947e-05
5	7.5	1.80949e-05
5.1	7.5	2.72687e-05
5.2	7.5	4.06326e-05
5.3	7.5	5.97439e-05
5.4	7.5	8.64869e-05
5.5	7.5	0.000122979
5.6	7.5	0.000171359
5.7	7.5	0.00023345
5.8	7.5	0.000310288
5.9	7.5	0.000401585
6	7.5	0.000505168
6.1	7.5	0.000616469
6.2	7.5	0.000728122
6.3	7.5	0.00082984
6.4	7.5	0.000908859
6.5	7.5	0.000951457
6.6	7.5	0.000945859
6.7	7.5	0.000886181
6.8	7.5	0.000775947
6.9	7.5	0.000628988
7	7.5	0.000466213
7.1	7.5	0.000309175
7.2	7.5	0.000173861
7.3	7.5	6.82825e-05
7.4	7.5	-5.78885e-06
7.5	7.5	-4.99338e-05
7.6	7.5	-6.78334e-05
7.7	7.5	-6.55278e-05
7.8	7.5	-5.13417e-05
7.9	7.5	-3.41157e-05
8	7.5	-2.01916e-05
8.1	7.5	-1.15586e-05
8.2	7.5	-6.92985e-06
8.3	7.5	-4.32619e-06
8.4	7.5	-2.60638e-06
8.5	7.5	-1.4253e-06
8.6	7.5	-6.93675e-07
8.7	7.5	-3.02757e-07
8.8	7.5	-1.2079e-07
8.9	7.5	-4.49973e-08
9	7.5	-1.59477e-08
4	7.6	1.43029e-07
4.1	7.6	2.25419e-07
4.2	7.6	3.54762e-07
4.3	7.6	5.57326e-07
4.4	7.6	8.73604e-07
4.5	7.6	1.36558e-06
4.6	7.6	2.12729e-06
4.7	7.6	3.29982e-06
4.8	7.6	5.09193e-06
4.9	7.6	7.80713e-06
5	7.6	1.18773e-05
5.1	7.6	1.79002e-05
5.2	7.6	2.6676e-05
5.3	7.6	3.92303e-05
5.4	7.6	5.68077e-05
5.5	7.6	8.08137e-05
5.6	7.6	0.000112686
5.7	7.6	0.000153682
5.8	7.6	0.000204599
5.9	7.6	0.000265447
6	7.6	0.000335116
6.1	7.6	0.000411064
6.2	7.6	0.000489033
6.3	7.6	0.000562847
6.4	7.6	0.000624452
6.5	7.6	0.000664541
6.6	7.6	0.000674106
6.7	7.6	0.00064693
6.8	7.6	0.000582324
6.9	7.6	0.00048665
7	7.6	0.000372311
7.1	7.6	0.000254195
7.2	7.6	0.000145471
7.3	7.6	5.51857e-05
7.4	7.6	-1.1666e-05
7.5	7.6	-5.31619e-05
7.6	7.6	-7.03106e-05
7.7	7.6	-6.76224e-05
7.8	7.6	-5.29172e-05
7.9	7.6	-3.51523e-05
8	7.6	-2.08928e-05
8.1	7.6	-1.21524e-05
8.2	7.6	-7.50177e-06
8.3	7.6	-4.83335e-06
8.4	7.6	-2.98574e-06
8.5	7.6	-1.66292e-06
8.6	7.6	-8.20682e-07
8.7	7.6	-3.62235e-07
8.8	7.6	-1.45875e-07
8.9	7.6	-5.47675e-08
9	7.6	-1.95366e-08
4	7.7	9.29221e-08
4.1	7.7	1.46444e-07
4.2	7.7	2.30461e-07
4.3	7.7	3.62031e-07
4.4	7.7	5.67441e-07
4.5	7.7	8.86922e-07
4.6	7.7	1.38149e-06
4.7	7.7	2.14266e-06
4.8	7.7	3.30578e-06
4.9	7.7	5.06753e-06
5	7.7	7.70754e-06
5.1	7.7	1.16127e-05
5.2	7.7	1.73e-05
5.3	7.7	2.54318e-05
5.4	7.7	3.68106e-05
5.5	7.7	5.23421e-05
5.6	7.7	7.29533e-05
5.7	7.7	9.94605e-05
5.8	7.7	0.000132398
5.9	7.7	0.000171828
6	7.7	0.000217156
6.1	7.7	0.000266965
6.2	7.7	0.000318856
6.3	7.7	0.000369298
6.4	7.7	0.000413546
6.5	7.7	0.000445811
6.6	7.7	0.000459956
6.7	7.7	0.000450842
6.8	7.7	0.000416105
6.9	7.7	0.000357576
7	7.7	0.000281442
7.1	7.7	0.000196787
7.2	7.7	0.00011331
7.3	7.7	3.95148e-05
7.4	7.7	-1.80208e-05
7.5	7.7	-5.50186e-05
7.6	7.7	-7.0341e-05
7.7	7.7	-6.70261e-05
7.8	7.7	-5.21712e-05
7.9	7.7	-3.45196e-05
8	7.7	-2.05668e-05
8.1	7.7	-1.21976e-05
8.2	7.7	-7.82151e-06
8.3	7.7	-5.24722e-06
8.4	7.7	-3.34439e-06
8.5	7.7	-1.90519e-06
8.6	7.7	-9.56486e-07
8.7	7.7	-4.28049e-07
8.8	7.7	-1.74374e-07
8.9	7.7	-6.61019e-08
9	7.7	-2.37701e-08
4	7.8	5.98835e-08
4.1	7.8	9.43697e-08
4.2	7.8	1.485e-07
4.3	7.8	2.33257e-07
4.4	7.8	3.65559e-07
4.5	7.8	5.71292e-07
4.6	7.8	8.89694e-07
4.7	7.8	1.37958e-06
4.8	7.8	2.12785e-06
4.9	7.8	3.26069e-06
5	7.8	4.95721e-06
5.1	7.8	7.46481e-06
5.2	7.8	1.11134e-05
5.3	7.8	1.63241e-05
5.4	7.8	2.36054e-05
5.5	7.8	3.35276e-05
5.6	7.8	4.66699e-05
5.7	7.8	6.35366e-05
5.8	7.8	8.44516e-05
5.9	7.8	0.000109448
6	7.8	0.000138172
6.1	7.8	0.000169804
6.2	7.8	0.000202997
6.3	7.8	0.000235791
6.4	7.8	0.000265532
6.5	7.8	0.000288863
6.6	7.8	0.000301952
6.7	7.8	0.000301104
6.8	7.8	0.00028375
6.9	7.8	0.000249489
7	7.8	0.000200676
7.1	7.8	0.000142188
7.2	7.8	8.05314e-05
7.3	7.8	2.27957e-05
7.4	7.8	-2.42556e-05
7.5	7.8	-5.52412e-05
7.6	7.8	-6.76707e-05
7.7	7.8	-6.34142e-05
7.8	7.8	-4.87578e-05
7.9	7.8	-3.19149e-05
8	7.8	-1.8982e-05
8.1	7.8	-1.15298e-05
8.2	7.8	-7.77879e-06
8.3	7.8	-5.49975e-06
8.4	7.8	-3.64534e-06
8.5	7.8	-2.13501e-06
8.6	7.8	-1.09453e-06
8.7	7.8	-4.98177e-07
8.8	7.8	-2.05829e-07
8.9	7.8	-7.89586e-08
9	7.8	-2.8677e-08
4	7.9	3.83989e-08
4.1	7.9	6.05083e-08
4.2	7.9	9.52076e-08
4.3	7.9	1.49531e-07
4.4	7.9	2.34313e-07
4.5	7.9	3.66118e-07
4.6	7.9	5.70047e-07
4.7	7.9	8.83688e-07
4.8	7.9	1.36254e-06
4.9	7.9	2.08705e-06
5	7.9	3.17129e-06
[truncated: 601 more rows]
